1 **A novel non-catalytic scaffolding activity of Hexokinase 2 contributes to EMT and metastasis**

2  
3  
4 Catherine Blaha<sup>1\*</sup>, Gopalakrishnan Ramakrishnan<sup>1\*</sup>, Sang-Min Jeon<sup>3\*</sup>, Hyunsoo Rho<sup>1</sup>, Prashanth  
5 Bhaskar<sup>1</sup>, Soeun Kang<sup>1</sup>, Veronique Nogueira<sup>1</sup>, Alexander R. Terry<sup>1</sup>, Alexandre F. Aissa<sup>1</sup>, Maxim V.  
6 Frolov<sup>1</sup>, Krushna C. Patra<sup>1,6</sup>, R. Brooks Robey<sup>4,5</sup>, and Nissim Hay<sup>1,2</sup>

7  
8 <sup>1</sup>Department of Biochemistry and Molecular Genetics, College of Medicine, University of Illinois  
9 at Chicago, Chicago, IL 60607, USA <sup>2</sup>Research & Development Section, Jesse Brown VA Medical  
10 Center, Chicago, IL 60612, USA; <sup>3</sup>College of Pharmacy, Ajou University Yeongtong-gu, Suwon-si,  
11 Gyeonggi-do, 443-749, Korea; <sup>4</sup>Veterans Affairs Medical Center, White River Junction, VT  
12 05009, USA, and <sup>5</sup>Geisel School of Medicine at Dartmouth, Hanover, NH 03755, USA

13  
14  
15 <sup>6</sup> Present address: Department of Cancer Biology; University of Cincinnati, Cincinnati OH 45267-  
16 0521

17  
18 \* Equal contributions

19  
20 Correspondence:

21 Nissim Hay: [nhay@uic.edu](mailto:nhay@uic.edu)

22 Sang-Min Jeon: [smjeon@ajou.ac.kr](mailto:smjeon@ajou.ac.kr)

23

24

25

26

27

28

29

## Abstract

30 Hexokinase 2 (HK2), a glycolytic enzyme that catalyzes the first committed step in glucose  
31 metabolism, is markedly induced in cancer cells. HK2's role in tumorigenesis has been  
32 attributed to its glucose kinase activity. However, we uncovered a novel kinase-independent  
33 HK2 activity, which promotes metastasis. We found that HK2 binds and sequesters glycogen  
34 kinase 3 (GSK3) and acts as a scaffold forming a ternary complex with the regulatory subunit of  
35 protein kinase A (PRKAR1a) and GSK3b to facilitate GSK3b phosphorylation by PKA, and to  
36 inhibit its activity. Thus, HK2 functions as an A-kinase anchoring protein (AKAP). GSK3b is known  
37 to phosphorylate proteins, which in turn are targeted for degradation. Consistently, HK2  
38 increased the level and stability of the GSK3 targets, MCL1, NRF2, and SNAIL. In a mouse model  
39 of breast cancer metastasis, systemic HK2 deletion after tumor onset inhibited metastasis,  
40 which is determined by the effect of HK2 on GSK3b and SNAIL. We concluded that HK2  
41 promotes SNAIL stability and breast cancer metastasis via two mechanisms: direct modulation  
42 of GSK3-activity and SNAIL-glycosylation that decreases susceptibility to phosphorylation by  
43 GSK3.

44

45

46

47 Increased glucose uptake and intracellular glucose metabolism are known to occur in cancer  
48 cells in response to hyperactivation of signaling pathways <sup>1</sup>. However, little is known about  
49 retrograde signaling, whereby glycolytic enzymes regulate the activity of signaling enzymes. The  
50 first committed step in glucose metabolism is catalyzed by hexokinases. The phosphorylation of  
51 glucose by hexokinases determines the flux of glucose in not only in glycolysis but also in the  
52 pentose phosphate pathway (PPP) and the hexosamine biosynthetic pathway <sup>2</sup>. Among the  
53 hexokinase isoforms hexokinase 1 (HK1) and hexokinase 2 (HK2) are mitochondria-associated,  
54 high affinity, low-K<sub>m</sub> hexokinases that couple oxidative phosphorylation and glycolysis. While  
55 HK1 is widely expressed in mammalian tissues, HK2 is expressed only in a limited number of  
56 tissues. However, when normal cells are converted to cancer cells, they start expressing very  
57 high levels of HK2 in addition to the already expressed HK1. Therefore, HK2 expression is  
58 considered a hallmark of cancer cells that determines their high glycolytic flux. Thus far, the  
59 role of HK2 in tumorigenesis was attributed to its glycolytic activity <sup>3,4</sup>.

60 The low-K<sub>m</sub> hexokinases (HK1 and HK2) are inhibited by their own catalytic product,  
61 glucose-6-phosphate (G6P), which distinguishes them from glucokinase. G6P acts as an  
62 allosteric inhibitor of HK1 and HK2 and this feedback inhibition is likely instated to coordinate  
63 the uptake of glucose and ATP consumed to phosphorylate it with the cellular demand for  
64 glucose as a carbon source for energy and building blocks for anabolic processes. Notably, G6P  
65 mimetics could be used to target HK2 glycolytic activity for cancer therapy <sup>4,5</sup>. Buildup in G6P  
66 level may occur in a temporal manner or when the flux downstream of G6P is attenuated or  
67 inhibited. The substitution of 2-deoxyglucose (2-DG) for glucose results in 2-deoxyglucose-6-  
68 phosphate (2-DG6P) accumulation because 2-DG6P cannot be further metabolized in glycolysis.  
69 Although 2-DG6P is less efficient than G6P in inhibiting HK1 and HK2, its rapid accumulation to  
70 relatively high amounts inside cells inhibits HK1 or HK2 <sup>6,7</sup>. Thus, 2-DG can be used to study the  
71 consequences of the allosteric inhibition of HK1 and HK2 by their own catalytic product. Using  
72 this approach, we uncovered a novel mechanism by which HK2 affects the activity of glycogen  
73 kinase 3 (GSK3).

74 GSK3 is a Ser/Thr kinase, which plays a crucial role in many vital cellular processes, such  
75 as cell proliferation, apoptosis, metabolism, and cancer progression. There are two isoforms of

76 GSK3 ( $\alpha$  and  $\beta$ ) encoded by two separate genes. The kinase activity of GSK3 is inhibited by  
77 phosphorylation of the protein at Ser21/Ser9 (corresponding residues in GSK3  $\alpha/\beta$ ). The  
78 phosphorylation of GSK3 on these residues is mediated by several AGC kinases<sup>8-12</sup>, and by  
79 Ser/Thr phosphatases such as protein phosphatase 1 (PP1) and protein phosphatase 2A (PP2A)  
80<sup>13</sup>.

81 Our results showed that HK2 sequesters GSK3 inhibiting its activity and accessibility to  
82 its targets. Importantly, we demonstrated that HK2 directly binds GSK3b and the cyclic-AMP  
83 dependent protein kinase A (PKA) regulatory subunit 1a (PRKAR1a) to facilitate GSK3b  
84 phosphorylation by PKA. Thus, HK2 functions as AKAP, independently of its catalytic activity.  
85 However, G6P disrupts the binding of HK2 to GSK3b and PRKAR1a. In vivo, the accumulation of  
86 G6P or 2DG6P, which change allosterically HK2, dramatically reduced the inhibitory  
87 phosphorylation of GSK3 $\alpha$  and GSK3 $\beta$  on Ser21 or Ser9 respectively, by dissociating GSK3 and  
88 increasing its susceptibility to PP2A.

89 Phosphorylation of proteins by GSK3 often targets them for degradation<sup>14</sup>. Consistent  
90 with the effect of HK2 on GSK3 activity, we found that both wild-type (WT) HK2 and kinase-  
91 dead HK2 affect the level and stability of MCL-1, NRF2, and SNAIL which are known GSK3  
92 targets<sup>15-17</sup><sup>18</sup>. We have demonstrated that SNAIL's stabilization by HK2 promotes EMT and  
93 breast cancer metastasis.

94

95

## 96 **Results**

### 97 **The glucose analog 2-deoxyglucose (2-DG) inhibits the phosphorylation of glycogen synthase** 98 **kinase 3 (GSK3) and increases its activity**

99 The replacement of glucose with two different glucose analogs, 2-DG and 5-thiogluco-  
100 se (5-TG), revealed a rapid reduction in the phosphorylation of GSK3 $\beta$  specifically by 2-DG, and not by 5-  
101 TG, in both Rat1a cells and mouse embryo fibroblasts (MEFs) (Fig. 1a). Although neither 2-DG  
102 nor 5-TG can be metabolized in glycolysis, 2-DG can be phosphorylated to 2-DG6P by  
103 hexokinase, whereas 5-TG, although binds hexokinase, cannot be phosphorylated by

104 hexokinase (Fig. 1b). The effect of 2-DG on both GSK3 $\alpha$  and GSK3 $\beta$  phosphorylation was  
105 observed in most rodent and human cell lines that were tested (Fig. 1c).

106 GSK3 is a versatile kinase that participates in many fundamental cellular processes, such  
107 as cell proliferation, cell growth, and cell survival<sup>9, 19</sup>. In many cases the phosphorylation of  
108 proteins by GSK3 targets them for degradation. For instance, GSK3 was shown to regulate the  
109 stability of the anti-apoptotic protein Mcl-1 through direct phosphorylation<sup>15</sup>. Indeed, we  
110 found that replacement of glucose with 2-DG markedly and rapidly reduced the level of Mcl-1  
111 (Fig. 1d).

112 **HK2 maintains a high level of GSK3 phosphorylation independent of its activity, but its**  
113 **activity is required for the suppression of GSK3 phosphorylation by 2-DG**

114 Unlike 5-TG, 2-DG can be phosphorylated by hexokinase, so we examined whether hexokinase  
115 activity is required for the inhibitory effect of 2-DG on GSK3 $\beta$  phosphorylation. We took  
116 advantage of M15-4 CHO cells<sup>20</sup>, which lack detectable hexokinase expression and have  
117 limited hexokinase activity, and ectopically expressed either WT HK2 or HK2 mutants in these  
118 cells. HK2-DA is a mutant in which alanine is substituted for two aspartic acid residues in the  
119 amino- and carboxy-terminal domains of HK2 required for the binding of glucose  
120 (D209A/D657A). HK2-SA is a mutant in which alanine is substituted for two serine residues in  
121 the amino- and carboxy-terminal domains required for catalytic activity (S155A/S603A)<sup>21</sup>. HK2-  
122 dMT is a mutant that carries a deletion of the first 20 amino acids, which are required for  
123 binding to VDAC and mitochondria. When expressed in M15-4 CHO cells, both WT HK2 and dMT  
124 mutant of HK2 had catalytic activity, whereas the DA and SA mutants had very little or no  
125 catalytic activity (Extended Data Fig. 1A). As shown in Fig. 1e and Extended Data Fig. 1b, 2-DG  
126 had no effect on GSK3 $\beta$  phosphorylation in M15-4 CHO cells expressing vector alone. However,  
127 expression of WT HK2 in these cells elevated GSK3 $\beta$  phosphorylation in the presence of  
128 glucose, but GSK3 $\beta$  phosphorylation was decreased in the presence of 2-DG. Surprisingly, both  
129 WT HK2 and kinase-inactive HK2 mutants increased GSK3 $\beta$  phosphorylation in the presence of  
130 glucose (Fig. 1e). However, the replacement of glucose with 2-DG reduced GSK3 $\beta$   
131 phosphorylation in cells expressing kinase-active WT HK2 or the mitochondrial binding-deficient

132 mutant (dMT-HK2) and, to a much lesser extent, in cells expressing kinase-inactive mutants (Fig.  
133 1e, and Extended Data Fig. 1b). Interestingly, overexpression of WT HK2, kinase-inactive HK2  
134 mutants, or a mitochondrial binding-deficient mutant of HK2 even in cells that express  
135 endogenous hexokinases, such as Rat1a and HEK-293 cells, also increased GSK3 $\beta$   
136 phosphorylation (Extended Data Fig. 2a, b). However, in all cell lines tested, 2-DG markedly  
137 reduced GSK3 $\beta$  phosphorylation only in cells expressing kinase-active HK2 (Fig. 1e, and  
138 Extended Data Fig. 2a, b). Taken together, these results indicate that high-level expression of  
139 HK2 can elevate the phosphorylation of GSK3 $\beta$  in a kinase-independent manner, while 2-DG  
140 markedly inhibits GSK3 $\beta$  phosphorylation only in the presence of a catalytically active  
141 hexokinase. The ability of HK2 to affect GSK3 $\beta$  phosphorylation appears to be independent of  
142 its binding to mitochondria. Therefore, these data strongly suggest that the effect of 2-DG on  
143 GSK3 phosphorylation is dependent upon 2-DG6P. Moreover, this can explain why 5-TG had no  
144 effect on the phosphorylation of GSK3, as unlike 2-DG, 5-TG cannot be phosphorylated. (see Fig.  
145 1a, b). Consistent with the effect of HK2 on GSK3 phosphorylation and activity, we found that  
146 the expression of either WT or mutant HK2 in M15-4 CHO cells markedly increased the steady  
147 state levels and stability of Mcl-1 (Fig. 1f and Fig. 1g).

148

#### 149 **The effects of HK2 and 2-DG on GSK3 $\beta$ phosphorylation are mediated by PKA and PP2A**

150 The phosphorylation of GSK3 $\beta$  on Ser9, leads to its inhibition and is mediated by several AGC  
151 kinases including AKT, PKC, PKA, p70S6K, and p90RSK as well as Ser/Thr protein phosphatases  
152 such as PP1 and PP2A<sup>22, 23</sup>. To understand the mechanism by which GSK3 phosphorylation is  
153 affected, we first determined which of the known kinases that phosphorylate GSK3 $\beta$  on Ser9  
154 might be involved. Akt is usually the predominant kinase that phosphorylates GSK3. However,  
155 we excluded Akt involvement because 2-DG inhibited GSK3 $\beta$  phosphorylation independently of  
156 Akt activity (Extended Data Fig. 3a-c). First, 2-DG reduced GSK3 $\beta$  phosphorylation despite a  
157 corresponding increase in Akt activation. Second, although the complete depletion of Akt  
158 activity in Akt1/2 DKO MEFs by LY294002 (PI3-kinase inhibitor) treatment reduced GSK3 $\beta$   
159 phosphorylation in the presence of glucose, it was further reduced when glucose was replaced  
160 with 2-DG. Finally, overexpression of a constitutively activated form of Akt (mAkt) was

161 associated with GSK3 $\beta$  phosphorylation, which was largely amenable to 2-DG inhibition. Taken  
162 together, these findings suggest that the effects of 2-DG on GSK3 $\beta$  phosphorylation and  
163 activation are not dependent on Akt.

164 In an unbiased yeast two-hybrid screen, where a full length HK2 was used as a bait, we  
165 found that a protein fragment containing the first 129 amino acids, which encompasses the  
166 dimerization/docking domain of PRKAR1a<sup>24</sup>, the regulatory subunit of PKA, interacts with HK2  
167 (Extended Data Fig. 4). Therefore, we next explored the possibility that the effect of 2-DG6P on  
168 GSK3 $\beta$  phosphorylation is mediated by PKA. PRKAR1a (RIa) binds the catalytic subunit of PKA  
169 and restrains its activity, but upon binding of cyclic-AMP, the catalytic subunit is dissociated  
170 from PRKAR1a, enabling the phosphorylation of PKA target proteins<sup>25</sup>. We, therefore, focused  
171 on the possibility that the effect of HK2 on GSK3 phosphorylation is mediated by PKA. We  
172 examined the effect of the adenylate cyclase inhibitor, 2'5'-dideoxyadenosine on the ability of  
173 HK2 to increase the phosphorylation of GSK3. As shown in Fig. 2a, the increase in GSK3  
174 phosphorylation following overexpression of HK2 in M15-4 CHO cells was blunted in the  
175 presence of the adenylate cyclase inhibitor 2'5'-dideoxyadenosine. We then used the PKA  
176 inhibitor H-89 and found that it reduced GSK3 phosphorylation mediated by HK2 (Fig. 2b). To  
177 further understand the mechanism by which HK2 affects GSK3 phosphorylation through  
178 PRKAR1a, we used immunoprecipitation experiments with HK2 and PRKAR1a to confirm the  
179 yeast two-hybrid results. Indeed, we found that HK2 bound PRKAR1a in the presence of  
180 glucose, but this binding was inhibited when glucose was replaced with 2-DG (Fig. 2c). As shown  
181 in Fig. 2d and Extended Data Fig. 5a, ectopically expressed HK2 also pulled down ectopically  
182 expressed GSK3 $\beta$  in the presence of glucose but not in the presence of 2-DG. Either the WT or  
183 active GSK3 $\beta$  mutant bound HK2 in the presence of glucose, but to a much lesser extent in the  
184 presence of 2-DG (Extended Data Fig. 5a). In a reciprocal experiment, GSK3 $\beta$  pulled down HK2  
185 (extended Fig. 5b). Notably, GSK3 $\beta$  was phosphorylated when was bound to HK2 (Extended  
186 Data Fig. 5a). Finally, when exogenous HK2 was immunoprecipitated, it pulled down  
187 endogenous PRKAR1a, but only in the presence of glucose and not in the presence of 2-DG (Fig.  
188 2e). Importantly, when M15-4 CHO cells were treated with 2-DG, GSK3 $\beta$  was dissociated from  
189 only catalytically active HK2 but not from kinase-dead HK2 mutants (Extended Fig. 5c). This is

190 consistent with the results showing that 2-DG markedly decreased GSK3 $\beta$  phosphorylation only  
191 when kinase-active HK2 was expressed but not when the kinase-dead HK2 mutant was  
192 expressed (Fig. 1e and Extended Data Fig. 2b). To verify that endogenous HK2 binds  
193 endogenous GSK3 $\beta$ , we immunoprecipitated endogenous HK2 from HEK293 cells and found  
194 that  
195 it interacted with endogenous GSK3 $\beta$ , but this interaction did not occur when glucose was  
196 replaced with 2-DG (Fig. 2f, see also Extended Data Fig. 13c). Taken together, these results raise  
197 the possibility that the binding of PRKAR1a and GSK3 $\beta$  to hexokinase increases the  
198 susceptibility of GSK3 $\beta$  to PKA-mediated phosphorylation in a cyclic AMP- and PKA-dependent  
199 manner. However, conformational changes in HK2 in response to 2-DG6P or glucose-6-  
200 phosphate (G6P) binding inhibits the interaction between HK2, PRKAR1a, and GSK3 $\beta$  and  
201 thereby decreases GSK3 $\beta$  phosphorylation.

202 Since both the protein phosphatase 1 (PP1) and protein phosphatase 2A (PP2A)  
203 phosphatases also regulate GSK3 phosphorylation<sup>13</sup>, we examined their potential involvement  
204 in the effect of hexokinase on GSK3 $\beta$  phosphorylation. Treatment of cells with the PP2A  
205 inhibitor okadaic acid (OA) or the PP1 inhibitor tautomycin (TC) revealed that treatment with  
206 100 nM OA markedly increased GSK3 $\beta$  phosphorylation in the presence of glucose but also  
207 blunted the decrease in GSK3 phosphorylation after glucose was replaced with 2-DG (Extended  
208 Data Fig. 6a). TC failed to mimic these effects at concentration as high as 500nM (Extended  
209 Data Fig. 6a), but the specific PP2A inhibitor LB100 inhibited the effect of 2-DG on  
210 GSK3 $\beta$  phosphorylation (Extended Data Fig. 6b), suggesting PP2A involvement in the  
211 dephosphorylating effect of 2-DG on GSK3 $\beta$ . Endogenous PP2A interaction with GSK3 $\beta$   
212 dissociated from HK2 in the presence of 2-DG (Fig. 2g) is compatible with this interpretation.  
213 These results indicate that HK2 facilitates GSK3 inhibition not only via PKA-mediated  
214 phosphorylation, but also via physical GSK3 sequestration and the associated prevention of its  
215 dephosphorylation and activation by PP2A.

216  
217 **HK2 forms complexes with GSK3b and PRKAR1a (R1a) in vitro in a G6P-dependent manner,**  
218 **indicating direct binding**



219 As was shown for bone-fide AKAPs the ultimate definition of AKAP is determined by its ability to  
220 bind directly to the PKA regulatory subunits together with the target protein. To further  
221 determine if HK2 can be categorized as AKAP, we conducted in vitro binding assays as  
222 previously described <sup>26</sup>. We employed His-tagged or GST-tagged protein coated plates. The  
223 plates were subjected to the interacting proteins and interaction was determined by  
224 fluorescent anti-tagged antibodies against the interacting protein (Fig. 3, Left panels). As shown  
225 in Fig. 3a anchored R1a binds the increasing amounts of HK2, but this interaction was disrupted  
226 after addition of G6P. Likewise, anchored GSK3b binds HK2, and this binding is disrupted by the  
227 addition of G6P (Fig. 3b). Finally, anchored R1a binds GSK3b only when HK2 is present to form a  
228 ternary complex (Fig. 3c). This complex is also sensitive to the addition of G6P but to a less  
229 extent than the individual complexes suggesting that the ternary complex is more resistant to  
230 the allosteric inhibition of HK2. To determine if the ternary complex can bind the catalytic PKA  
231 subunit (PKAc), we added PKAc to the tethered complex and showed that it binds in an HK2 and  
232 R1a dependent manner (Fig. 3d). Furthermore, addition of cAMP markedly induced the  
233 phosphorylation of GSK3b in the complex, which was diminished by G6P (Fig. 3e). Therefore,  
234 collectively, these results provide a strong evidence that the binding of HK2 to GSK3b and R1a is  
235 direct and that HK2 is a bone-fide AKAP.

236 The majority of AKAPs have dual specificity for the regulatory subunits of PKA, R1a and  
237 R2a, whereas a subset of AKAPs bind R1a only <sup>27</sup>. We subjected the complex of HK2 and R1a to  
238 the disruptor FMP-API-1, which disrupt either R1a or R2a from the dual specificity AKAPs <sup>28</sup>. We  
239 found that FMP-API-1 could not disrupt HK2-R1a interaction in vitro (Extended data Fig. 7),  
240 suggesting that HK2 is a R1a specific AKAP.

### 241 242 **Glucose flux could determine the effect of HK2 on GSK3 phosphorylation**

243 The results described above showed that in the presence of glucose, HK2 elevates GSK3  
244 phosphorylation through its interaction with GSK3 and PKA (which phosphorylates GSK3). This  
245 effect on GSK3 phosphorylation is independent of either hexokinase activity or binding to the  
246 mitochondria. However, the replacement of glucose with 2-DG inhibited GSK3 phosphorylation  
247 through a mechanism that was dependent on hexokinase activity and the phosphorylation of 2-

248 DG to 2-DG6P. Unlike G6P, 2-DG6P is not utilized in glycolysis and therefore accumulates and  
249 binds HK2 to elicit conformational changes that promote the dissociation of GSK3 and R1a. If  
250 this hypothesis is correct, it is expected that a reduction in glucose metabolism flux in a way  
251 that causes G6P accumulation should reduce GSK3 phosphorylation. Therefore, we inhibited  
252 the flux of glucose metabolism by exposing the cells to 6-aminonicotinamide (6-AN). 6-AN  
253 inhibits 6-phosphogluconate dehydrogenase (6-PGDH), which results in the accumulation of 6-  
254 phosphogluconate (6-PG). 6-PG is a competitive inhibitor of phosphoglucose isomerase (PGI),  
255 and its inhibition is known to induce G6P accumulation<sup>29, 30, 31</sup> (Fig. 4a). Indeed, we found a  
256 marked reduction in GSK3 $\beta$  phosphorylation following treatment with 6-AN (Fig. 4b, e, and  
257 Extended Data Fig. 13b). Interestingly, dehydroepiandrosterone (DHEA), which inhibits glucose-  
258 6-phosphate dehydrogenase (G6PDH) and the first step of the PPP (Fig. 4a), did not inhibit  
259 GSK3 $\beta$  phosphorylation (Fig. 4b), suggesting that G6P does not sufficiently accumulate if only  
260 the first step of the PPP is inhibited. Consistently, we found accumulation of G6P in the cells  
261 only after 6-AN treatment and not after DHEA treatment (Fig. 4c). To further corroborate these  
262 pharmacological results, we used A549 cells expressing doxycycline (DOX)-induced shRNA  
263 targeting G6PDH, PGI or 6PGDH. First, we found that both the pentose phosphate pathway  
264 (PPP) and glycolysis were inhibited by either 6-AN or 6PGDH knockdown (Fig. 4d), consistent  
265 with inhibition of PGI and the accumulation of G6P. Second, and as expected PGI knockdown  
266 decreased secreted lactate, but the secreted lactate was also decreased by 6PGDH knockdown  
267 and not by G6PD knockdown further supporting the notion that 6PGDH deficiency via 6-PG  
268 accumulation inhibits PGI (Extended Data Fig. 8). Consistent with the pharmacological results,  
269 only the knockdown of 6PGDH inhibited the phosphorylation of GSK3 $\beta$ , similar to 6AN  
270 treatment (Fig. 4e). Furthermore, the same as with 6-AN, 6PGDH deficiency and not PGI  
271 deficiency induced the accumulation of both 6PG (Fig. 4f) and G6P (Fig. 4g).

272 Since NRF2 expression is elevated in A549 cells because of a lack of functional KEAP1,  
273 NRF2 protein stability is controlled in these cells by GSK3 phosphorylation in a Keap1-  
274 independent manner<sup>32</sup>. Consistently, we found that the knockdown of HK2 in A549 cells  
275 decreased the phosphorylation of GSK3 $\alpha$  and GSK3 $\beta$  with concomitant decrease in MCL1 and  
276 NRF2 protein levels (Extended Data Fig. 9). Thus, it is expected that NRF2 protein levels would

277 be decreased upon depletion of 6-PGDH. Indeed, we found that following the knockdown of 6-  
278 PGDH, NRF2 protein levels declined (Fig. 4h).

279 Collectively, these results show that HK2 acts as a scaffold that brings together PKA and  
280 its substrate, GSK3, to facilitate the phosphorylation of GSK3. As depicted in Extended Data Fig.  
281 10, upon accumulation of G6P or 2-DG6P, which induces an allosteric conformational change in  
282 HK2, GSK3 is released and subjected to dephosphorylation by PP2A. We concluded that HK2  
283 inhibits GSK3 activity by sequestration and by facilitating its phosphorylation by PKA as was  
284 shown for other two AKAPs. Both AKAP200 and GSK3b interacting protein (GSKIP) were shown  
285 to interact with both GSK3b and PKA to facilitate the phosphorylation of GSK3b by PKA<sup>26, 33, 34</sup>  
286 (see Discussion).

287

### 288 **Systemic HK2 deletion in a highly metastatic mouse model of breast cancer decreased** 289 **metastasis to the lung**

290 The induction of HK2 expression in cancer cells distinguishes them from normal  
291 cells. We previously showed that systemic deletion of HK2 in adult mice impeded lung  
292 cancer without adverse consequences, suggesting that HK2 could be a selective  
293 therapeutic target for cancer<sup>35</sup>. HK2 was also implicated in breast cancer metastasis<sup>36</sup>;  
294 therefore, we examined whether systemic HK2 deletion could inhibit breast cancer  
295 metastasis.

296 As shown previously<sup>35</sup>, and in Fig. 6d, HK2 expression was markedly induced in the  
297 MMTV-PyMT mouse model of breast cancer metastasis<sup>37</sup>, thus making it an ideal mouse model  
298 to study HK2's role in metastasis. Therefore, we crossed the *MMTV-PyMT* mice with *HK2<sup>ff</sup>; UBC-*  
299 *Cre<sup>ERT2</sup>* mice to enable systemic deletion of HK2 after primary breast tumor onset in order to  
300 emulate drug therapy and test the effect of systemic HK2 deletion on breast cancer metastasis  
301 (Fig. 5a). Once a primary breast tumor was detected by palpation in experimental *MMTV-PyMT*;  
302 *HK2<sup>ff</sup>; UBC-Cre<sup>ERT2</sup>* mice and control *MMTV-PyMT; HK2<sup>ff</sup>* mice, the mice were injected with  
303 tamoxifen for 7 consecutive days to systemically delete HK2 in the experimental *MMTV-PyMT*;  
304 *HK2<sup>ff</sup>; UBC-Cre<sup>ERT2</sup>* mice (Fig. 5a). Systemic HK2 deletion increased the time required to reach  
305 end-point (when a tumor reached ~2cm in diameter) (Fig. 5b). At the tumor end-point, the mice

306 were euthanized, and the lungs were analyzed for metastases. As shown in Fig. 5c, lung  
307 metastatic lesions were markedly decreased by the systemic deletion of HK2. To determine  
308 whether the effect of HK2 on metastasis is cell autonomous, mammary epithelial cells were  
309 isolated from the breast tumors of donor *MMTV-PyMT; HK2<sup>ff</sup>* mice and established in tissue  
310 culture. The cells were infected with GFP-Cre adenovirus to delete HK2, or GFP adenovirus as a  
311 control. The cells were transplanted into the mammary fat pad of recipient NOG mice and  
312 followed until end-point. HK2 deletion significantly decreased metastatic lung lesions (Fig. 5d).  
313 To further determine the cell autonomous effect of HK2 on metastasis, we generated *MMTV-*  
314 *PyMT;Hk2<sup>ff</sup>;LSL.Luc;MMTV.rtTATet(O)Cre* mice in which HK2 could be specifically deleted in the  
315 mammary gland immediately after tumor onset by exposing the mice to doxycycline diet (Fig.  
316 5e), and found a marked reduction in the metastatic lesions in the lungs. Thus, the effect of  
317 HK2 on metastasis is, at least in part, cell autonomous.

318

### 319 **HK2 deletion decreased the expression of epithelial mesenchymal transition (EMT) genes and** 320 **SNAIL protein abundance**

321 We analyzed the primary tumors with single-cell RNA sequencing (scRNA-seq). We adopted  
322 Drop-seq technology for scRNA-seq as previously described<sup>38 39-41</sup>. We sequenced 28417  
323 cells from 15 biological replicates of primary tumors derived from *MMTV-PyMT;HK2<sup>ff</sup>;UBC-*  
324 *Cre<sup>ERT2</sup>* mice with and without systemic HK2 deletion (7 replicates and 8 replicates,  
325 respectively). We found 25 clusters and identified 9 clusters (0, 3, 5, 9, 10, 11, 14, 15, and  
326 18) within the primary tumor based on the expression of PyMT (Fig. 6A, and Supp. Table 1).  
327 However, the percentage of cells from the primary tumors after the systemic deletion of  
328 HK2 that grouped into the 9 PyMT clusters was not significantly different from that in the  
329 control primary tumors (Extended Data Fig. 11, and Supp. Table 1). However, when we had  
330 a close look at two adjacent clusters; cluster 14, which expresses the highest levels of  
331 epithelial markers, and cluster 15, which expresses the highest levels of mesenchymal  
332 markers, we found changes in the expression of SNAIL target genes by the deletion of HK2.  
333 Cluster 14 exhibited high expression of the epithelial markers including E-cadherin (Cdh1),  
334 Claudin-1 (Cldn1) and Desmoplakin (Dsp), which are known to be repressed by SNAIL<sup>42-44</sup>.

335 Cluster 15 expresses the highest level of genes that promote EMT and are known SNAIL  
336 targets (vimentin (Vim), Matrix metalloproteinase 2 (Mmp2), secreted protein acidic and  
337 cysteine rich (Sparc), TGF beta receptor 2 (Tgfbr2), and Transgelin (Tagln)). Interestingly,  
338 the systemic deletion of HK2 markedly reduced SNAIL target genes in Cluster 15 and  
339 increased epithelial genes in Cluster 14 in comparison with their levels in the control  
340 samples (Fig. 6b and c). These results suggest that the loss of HK2 in primary tumors  
341 impaired the expression of SNAIL-regulated targets important for EMT and metastasis.

342 EMT is important for breast cancer metastasis, and the deletion of SNAIL in the  
343 mammary gland of MMTV-PyMT mice was shown to inhibit metastasis to the lung<sup>45, 46</sup>.  
344 Therefore, the results raised the possibility that the deletion of HK2 could affect metastasis by  
345 impairing SNAIL activity to mediate EMT. When we analyzed the primary tumors for SNAIL  
346 protein levels, we first found that HK2 was induced, with a concomitant marked increase in  
347 SNAIL in the tumors when compared to that in normal mammary glands (Fig. 6d); second, SNAIL  
348 protein levels in the tumors were markedly reduced after HK2 deletion (Fig. 6e). To determine if  
349 the effect of systemic HK2 deletion on SNAIL is cell autonomous, we analyzed primary tumors in  
350 the cell autonomous mouse model described in Fig. 5e. As shown in Fig. 6f, cell autonomous  
351 HK2 deletion in the mammary gland decreased p-GSK3b, with concomitant increase in E-  
352 cadherin, in the primary tumors. Finally, when cells were isolated from the primary tumors of  
353 *MMTV-PyMT; HK2<sup>ff</sup>* mice and HK2 was deleted by adenovirus expressing Cre, we found that the  
354 SNAIL protein level was decreased, with a concomitant increase in the E-cadherin protein level  
355 and a decrease in the vimentin protein level (Fig. 6g). Taken together, these results indicate  
356 that HK2 deletion reduced SNAIL protein level, and leading to a decrease in its transcriptional  
357 activity important for EMT.

### 358 359 **Increased HK2 expression correlates with increased metastatic potential**

360 To further investigate the cell autonomous role of HK2 in metastasis, we utilized two  
361 isogenic mammary tumor cell lines (67NR and 4T1) that, when implanted into the  
362 mammary gland of mice, display different metastatic potential<sup>47</sup>. Both cell lines have the  
363 ability to form mammary tumors within a month. However, the 67NR cells only forms

364 primary tumors with no metastasis, whereas the 4T1 cells forms primary tumor with high  
365 incidence of metastasis to the lung. When HK2 protein levels were analyzed, the non-  
366 metastatic cell line 67NR exhibited markedly lower levels when compared to the highly  
367 metastatic 4T1 cell line (Fig. 7a). As a result, this enabled us to manipulate the level of HK2  
368 expression in these cell lines to determine whether HK2 plays a cell autonomous role in the  
369 metastatic potential of these cell lines. Therefore, we silenced HK2 in 4T1 cells (4T1shHK2)  
370 and overexpressed HK2 in 67NR cells (67NR HK2) (Extended Data Fig. 12a). The knockdown  
371 of HK2 in 4T1 cells decreased transwell migration, and invasion (Extended Data Fig. 12b, c)  
372 while the overexpression of WT HK2 in 67NR cells increased migration (Extended Data Fig.  
373 12b). Interestingly, even overexpression of kinase inactive HK2DA mutant in 67NR cells was  
374 able to increase migration (Extended Data Fig. 12c), suggesting that, at least in these cells,  
375 the scaffolding activity of HK2 is pre-dominant in promoting migration. Thus, overall, HK2  
376 level appears to correlate with the metastatic potential of these cell lines. Next, we  
377 assessed the effect of HK2 on the metastasis of 4T1 cells in vivo. 4T1 or 4T1 shHK2 cells were  
378 injected orthotopically into the fourth mammary fat pad of syngeneic mice. At end-point, when  
379 primary tumors reached the same size, the mice were euthanized, and the lungs were analyzed  
380 for lung metastases. The knockdown of HK2 significantly decreased the number of lung  
381 metastases. The control 4T1 tumors had an average of 28 lung metastases whereas the mice  
382 with 4T1 shHK2 tumors had an average of 4 lung metastases (Fig. 7b).

383

### 384 **HK2 regulates the protein stability of the EMT transcription factor SNAIL in a GSK3 $\beta$ -** 385 **dependent manner**

386 Based on the results in Fig. 6, we concluded that HK2 deletion might affect EMT and  
387 metastasis by downregulating SNAIL protein levels. Because SNAIL protein level was shown  
388 to be regulated by GSK3 phosphorylation, targeting it for proteasomal degradation<sup>18</sup>, we  
389 determined whether HK2 affects the level of SNAIL via GSK3.

390 Consistent with the results obtained with the primary MMTV-PyMT tumors (Figs.  
391 6e-g), SNAIL protein levels were decreased by knocking down HK2 in 4T1 cells, with a  
392 concomitant decrease in Vimentin and increase in E-cadherin at both the protein and

393 mRNA levels (Figs. 7c-e). Interestingly, the mRNA level of SNAIL (Fig. 7e) did not correlate  
394 with SNAIL protein levels (Fig. 7c), indicating that SNAIL protein stability was impaired by  
395 HK2 silencing. We also found that the decrease of SNAIL protein level in 4T1shHK2 cells  
396 was associated with a concomitant decrease in GSK3 $\beta$  phosphorylation, whereas the  
397 increase in SNAIL protein level in 67NR WTHK2 cells is associated with concomitant  
398 increase in GSK3 $\beta$  phosphorylation (Fig. 7c). To directly test the possibility that HK2 affects  
399 SNAIL protein stability, we analyzed the half-life of SNAIL in 4T1 cells after the knockdown  
400 of HK2 and found that the half-life of SNAIL protein was markedly decreased (Fig. 7f). The  
401 half-life of ectopically expressed SNAIL-GFP fusion protein was also markedly decreased by  
402 the knockdown of HK2 (Fig. 7g), but this was not true for the half-life of 6SA-SNAIL-GFP  
403 fusion protein, in which all the serine residues that are phosphorylated by GSK3 were  
404 converted alanine residues<sup>18</sup> (Fig. 7h).

405 GSK3 $\beta$  not only targets SNAIL for degradation, but also shifts the localization of  
406 SNAIL from the nucleus to the cytoplasm<sup>18</sup>. We wanted to determine whether HK2  
407 expression could mediate the localization of SNAIL in a GSK3 $\beta$ -dependent manner. We  
408 therefore quantified the intracellular localization of WT SNAIL-GFP fusion protein or  
409 mutant 6SA-SNAIL-GFP fusion protein, which is resistant to GSK3 phosphorylation<sup>18</sup>, in 4T1  
410 and 4T1shHK2 cells. WT SNAIL was mainly localized to the nucleus in the 4T1 cells, but its  
411 localization shifted to a more cytoplasmic localization in the 4T1shHK2 cells, whereas the  
412 SNAIL-6SA mutant remained mostly nuclear in both cell lines (Fig. 7i). Taken together these  
413 results strongly demonstrate that HK2 affects SNAIL protein stability and nuclear  
414 localization via its effect on GSK3. Furthermore, 2DG treatment, which led to the  
415 accumulation 2DG6P, as well as 6-AN treatment that leads to accumulation of G6P and  
416 activation of GSK3 decreased SNAIL protein levels in 4T1 cells (Extended Data Fig. 13 a, b,  
417 c). Finally, the same as was shown for HEK293 cells in Fig. 2f, we found that in 4T1 cells  
418 endogenous HK2 binds endogenous GSK3 only in the presence of glucose and not in the in  
419 the presence of 2-DG (Extended Data Fig. 13c).

420 If the HK2 effect on metastasis is via SNAIL, it is expected that 6SA-SNAIL mutant  
421 would restore metastasis in HK2-deficient cells. Since it was reported that only transient

422 SNAIL expression induces metastasis, whereas constitutive expression of SNAIL does not  
423 and may impede metastasis <sup>46</sup>, we generated a 4T1shHK2 cell line with doxycycline-  
424 inducible 6SA-SNAIL expression. Transient inducible expression of SNAIL-6SA mutant in the  
425 4T1shHK2 in mice rescued changes in lung metastasis (Fig. 7j). We concluded that HK2  
426 affects metastasis through its effect on SNAIL protein stability and nuclear localization.

427

#### 428 **HK2 deficiency impaired global O-GlcNAcylation and specific SNAIL O-GlcNAc modification**

429 It was previously reported that O-linked-N-acetylglucosamine (O-GlcNAc) modification (O-  
430 GlcNAcylation) is important to breast cancer primary tumor progression and metastasis, and  
431 that primary tumor GlcNAcylation levels were found to be increased during mammary tumor  
432 progression in MMTV-PyMT mice <sup>48</sup>. Uridine 5'-diphospho-N acetylglucosamine (UDP-GlcNAc),  
433 which is transferred to the serine or threonine residues of proteins to yield O-GlcNAcylation, is  
434 generated by the hexosamine biosynthetic pathway. Flux in the hexosamine biosynthesis  
435 pathway is dependent on G6P, raising the possibility that HK2 deficiency reduces glycosylation.  
436 By using an O-GlcNAc specific antibody on total protein lysates, we found that the systemic  
437 deletion of HK2 in MMTV-PyMT mice decreased the total O-GlcNAcylation levels in the primary  
438 tumors at end-point (Fig. 8a). Consistently, the nonmetastatic 67NR cells, which express  
439 relatively low level of HK2, had less total O-GlcNAcylation when compared to the metastatic  
440 4T1 cells, which express higher level of HK2 (Fig. 8b). Furthermore, the knockdown of HK2 in  
441 4T1 cells decreased protein O-GlcNAcylation, and overexpression of WT HK2 in 67NR cells  
442 increased the O-GlcNAcylation (Fig. 8b). Taken together these results strongly suggest that HK2  
443 deficiency reduces global O-GlcNAcylation. To further interrogate the role of HK2 in the  
444 hexosamine pathway we conducted a metabolic labeling experiment to determine whether  
445 HK2 deficiency decreases the flux of glucose to the hexosamine pathway. As shown in Fig. 8C,  
446 HK2 deficiency markedly decreased the incorporation of U<sup>13</sup> C<sub>6</sub> glucose in all UDP-GlcNAc  
447 isotopomers.

448 O-GlcNAcylation had been shown to contribute to SNAIL protein stability by blocking  
449 GSK3 $\beta$  from serially phosphorylating SNAIL to promote its degradation <sup>49</sup>. O-GlcNAc at Ser112  
450 stabilizes SNAIL by blocking GSK3 $\beta$  from serially phosphorylating at serine 104, 107, and 111



451 and promoting SNAIL degradation<sup>49</sup>. Therefore, we wanted to examine whether in addition to  
452 the noncatalytic effect of HK2 on GSK3 activity, HK2 could affect the glycosylation of SNAIL. To  
453 verify whether there are specific changes in O-GlcNAcylation of the SNAIL protein itself  
454 occurred, GFP-SNAIL was transiently expressed in the 4T1 and 4T1shHK2 cells. This was  
455 followed by immunoprecipitation with anti-O-GlcNAc antibody and immunoblotting with anti-  
456 SNAIL antibody (Fig. 8d). The results clearly showed that SNAIL O-GlcNAcylation was  
457 diminished by the deficiency of HK2. We concluded that in addition to its noncatalytic activity  
458 on GSK3, HK2 catalytic ability can also contribute to the stability and nuclear localization of  
459 SNAIL via O-GlcNAcylation (Fig. 8e).

460

## 461 **Discussion**

462 HK2 is markedly induced in cancer cells when compared to normal cells. An increase in HK2  
463 expression and activity is a critical determinant of the accelerated glucose metabolism in cancer  
464 cells. We previously documented that HK2 is required for tumorigenesis both in vitro and in  
465 vivo<sup>4, 35, 50</sup>. HK2 expression also correlates with the incidence of breast cancer metastasis to the  
466 brain<sup>36</sup>. However, thus far the pro-tumorigenic role of HK2 has been attributed to its metabolic  
467 activity as a glucose kinase that converts glucose to glucose 6-phosphate. Here we uncovered a  
468 new activity of HK2 independent of its catalytic activity. We showed that HK2 binds to GSK3 as  
469 well as the PKA regulatory subunit RIa, and it is conceivable that HK2 thereby facilitates the  
470 phosphorylation of GSK3 by PKA. Since these interactions may not require HK2 catalytic activity,  
471 HK2 may act as purely a scaffold in this scenario. On the other hand, the conversion of glucose  
472 to G6P or 2-DG to 2-DG6P by catalytically active hexokinase seems to be required for the  
473 diminished phosphorylation of GSK3 and therefore its activation. Binding of G6P or 2-DG6P to  
474 HK2 induces a conformational change that can dissociate GSK3. Indeed, we found that 2-DG  
475 disrupted the HK2-GSK3 and HK2-RIa interactions. In addition, we found that following the  
476 dissociation of GSK3 by 2-DG, it interacts with PP2A, which facilitates its dephosphorylation and  
477 thus its activation.

478 Our results suggest that HK2 can function as an A-kinase-anchoring protein (AKAP), a

479 novel moonlighting function for this important glycolytic enzyme that has not previously been  
480 described. Two of the AKAPs, AKAP220 and GSKIP, were shown to facilitate GSK3  
481 phosphorylation by anchoring PKA through its interaction with PRKAR2<sup>26, 33, 34</sup>, but AKAP220  
482 was also reported to interact with PRKAR1<sup>34</sup>. Interestingly, some AKAPs were shown to interact  
483 with phosphatases. For instance, AKAP220 was shown to interact with PP1, which could  
484 contribute to the regulation of GSK3 phosphorylation<sup>34</sup>. Although we were unable to  
485 demonstrate binding of PP2A to HK2, we showed that GSK3 binds PP2A when not sequestered  
486 by HK2. That said, we cannot completely exclude PP2A binding to HK2. It is interesting to note  
487 that D-AKAP1 interacts with the outer mitochondrial membrane through an hydrophobic motif  
488 similar to those of HK1 and HK2<sup>51</sup> and thus could be in close proximity to the mitochondrial  
489 HK2. Therefore, we could not completely rule out the possibility that PKA and phosphatases  
490 associated with D-AKAP1 could also influence the phosphorylation of GSK3 associated with HK2,  
491 although we found that a mitochondrial binding-deficient mutant of HK2 could still exert a  
492 similar effect on GSK3. We clearly showed that HK2 binds GSK3b and affects GSK3b  
493 phosphorylation in a kinase-independent manner. The yeast-two hybrid screen showed that  
494 the amino-terminus domain of R1a, which possess the docking site to AKAPs<sup>24</sup>, is sufficient to  
495 bind HK2. The binding of HK2 to R1a was confirmed by co-immunoprecipitation in mammalian  
496 cells and together with the inhibition of HK2-mediated GSK3 phosphorylation by  
497 pharmacological inhibitors of adenylate cyclase and PKA, the results strongly suggest that HK2  
498 could be a bona-fide AKAP. This is confirmed by the in vitro binding assays with purified  
499 proteins that showed unequivocally a direct binding between HK2, GSK3b, and R1a to form  
500 complexes that are disrupted upon addition of G6P.

501 All ~100 kDa high affinity hexokinases are thought to have arisen from gene duplication  
502 and tandem ligation events involving a common ancestral ~50 kDa hexokinase<sup>21, 52</sup>. As a  
503 consequence of this common evolutionary origin, the individual amino- and carboxy-halves of  
504 HK2 are highly homologous with each other and with the corresponding hemidomains of HK1.  
505 Given their known structural similarities, it is conceivable that both hemidomains could anchor  
506 GSK3, PKA, and possibly PP2A (Extended Data Fig. 10). Although presently speculative, we also  
507 cannot exclude the possibility that HK1 may serve similar AKAP-like roles.

508 In summary, we have discovered a novel phenomenon, wherein glucose metabolites regulate  
509 the activity of GSK3 with far-reaching and profound biological significance. HK2 can sequester  
510 GSK3 and facilitate its phosphorylation. However, a metabolic slow-down that leads to the  
511 accumulation of the most upstream glucose metabolite, G6P, could trigger the  
512 dephosphorylation and consequent activation of GSK3. In turn, GSK3 could affect cell  
513 proliferation, cell growth, cell survival by multiple mechanisms, and tumorigenesis. We showed  
514 that HK2 could affect the levels of three proteins that are known targets of GSK3: MCL1, NRF2,  
515 and SNAIL. Here, we also showed for the first time that systemic deletion of HK2 inhibited  
516 breast cancer metastasis in a mouse model of breast cancer metastasis. Our results strongly  
517 suggest that the effect of HK2 on metastasis is mostly cell autonomous, although we cannot  
518 completely exclude non-cell autonomous effects. We have demonstrated that HK2 depletion  
519 reduced SNAIL protein levels in a GSK3-dependent manner and in turn affected the expression  
520 of EMT genes and metastasis. It was shown that the extent of GlcNAcylation is induced in  
521 human breast cancer and is further elevated in metastatic lymph nodes<sup>53</sup>. It was also reported  
522 that O-GlcNAcylation and GlcNAcylation in general are important for breast cancer tumor  
523 progression and metastasis<sup>48, 53</sup> and that SNAIL phosphorylation by GSK3 could be  
524 counteracted by O-GlcNAcylation<sup>49</sup>. Therefore, we examined the effect of HK2 depletion on the  
525 hexosamine pathway, as well as general and SNAIL-specific O-GlcNAcylation. Our findings  
526 showed that HK2 depletion markedly reduced the hexosamine pathway and both general and  
527 SNAIL-specific O-GlcNAcylation. Thus, our results showed that both the noncatalytic activity,  
528 uncovered here, and the catalytic HK2 activity contribute to the regulation of SNAIL protein  
529 levels and metastasis. Importantly, as we had previously suggested the feedback inhibition of  
530 HK2 by its own catalytic product G6P could be used as a strategy to target HK2 for cancer  
531 therapy by developing mimetics of G6P or 2DG6P to inhibit its activity<sup>35</sup>. Using this approach,  
532 inhibitors that selectively target HK2 and not HK1 were developed<sup>5</sup>. Since G6P or 2DG6P also  
533 dissociates GSK3 from HK2 thereby increasing the activity of GSK3, this approach could inhibit  
534 both the glycolytic activity of HK2 as well as its moonlighting activity as a promoter of  
535 metastasis.  
536

537 **Methods**

538 **Cell culture, transfection and transduction**

539 MI5-4 CHO cells were kindly provided by Dr. John Wilson. CHO cells were cultured in  $\alpha$ -MEM  
540 supplemented with 10% FBS (Gemini) and 2 mM glutamine. All other cells were cultured in  
541 DMEM (Invitrogen) containing 10% FBS (Gemini). For glucose starvation, the medium was  
542 replaced with glucose-free DMEM (Invitrogen) containing 10% dialyzed FBS (Gemini) after  
543 washing with PBS. For immunoprecipitation,  $2 \times 10^6$  HEK293-HK2-HA cells were plated in 6-cm  
544 dishes one day before transfection using 2  $\mu$ g of each plasmid. After 24 hr of transfection, cells  
545 were used for experiments. For transient transfection of shRNA plasmids in HEK293-HK2-HA  
546 cells,  $2.5 \times 10^5$  cells were plated in 6-well plates one day before transfection using 3  $\mu$ g of each  
547 shRNA plasmid and Lipofectamine 2000. After 48 hr of transfection, cells were used for  
548 experiments. For the tet-inducible shRNA expression system, each shRNA sequence was  
549 inserted into the Tet-pLKO-puro vector (a gift from Dmitri Wiederschain; Addgene plasmid  
550 #21915). The most efficient shRNA sequences we used were TRCN0000281204 for G6PDsh,  
551 TRCN0000274975 for GPGDsh, and TRCN0000290649 for GPIsh. For lentivirus production, each  
552 lentiviral vector was cotransfected with pMD2.G and psPAX2 (gifts from Didier Trono; Addgene  
553 plasmids #12259 and #12260, respectively) in 293T cells using Lipofectamine 2000 as described  
554 in a protocol on the Addgene website. Lentivirus infection was performed overnight in the  
555 presence of polybrene, and selection was carried out with 10  $\mu$ g/ml blasticidin.

556 The cDNA for rat HK2 was subcloned into the pcDNA3-HA vector. Site-directed  
557 mutagenesis of HK2-DA (D209A/D657A; a non-glucose-binding mutant), SA (S155A/S603A; a  
558 noncatalytic mutant), and dMT (d1-20aa) was performed using QuickChange II XL (Stratagene)  
559 according to the manufacturer's instructions. The HA-tagged cDNAs were subcloned into the  
560 pLenti6-D-TOPO vector (Invitrogen). The cDNA for human GSK3 $\beta$  was subcloned into the pCMV-  
561 myc vector. cDNA for human PRKAR1a was subcloned into the pLenti6-D-TOPO vector. All  
562 lentiviruses were produced using the BLOCK-iT lentiviral expression system (Invitrogen)  
563 according to the manufacturer's instructions.

564 Polyclonal 4T1 cells with stable HK2 knockdown were generated after infection with pLenti6-  
565 puro vector expressing a mouse HK2 hairpin and selection with puromycin. The HK2 mouse

566 target sequence was 5'-GCATATGATCGCCTGCTTAT-3'. Flag-Snail-6SA and GFP-SNAIL-6SA were  
567 obtained from Mien-Chie Hung through Addgene (Addgene plasmid # 16225  
568 ; <http://n2t.net/addgene:16225> ; RRID:Addgene\_16225) and cloned into the PCW-puro vector  
569 (addgene: 50661, following the removal of Cas9 with NHEI and BamHI) using Gibson Assembly.  
570 The ViraPower™ lentiviral expression system from Thermo Fischer Scientific was used for virus  
571 production. Cells were selected with 2 µg/µl puromycin or 8 µg/µl blasticidin for 5 days. The  
572 4T1 cells were sent for screening with the IDEAX Impact I panel before orthotopic  
573 transplantation into mice. The cells used to test for total O-GlcNAc levels, and for  
574 immunoprecipitation experiments were plated in 5 mM glucose DMEM with 10% serum for at  
575 least 5 days prior to harvesting for experiments.

#### 576 Immunoprecipitation and immunoblotting

577 For immunoprecipitation, cells grown in 6-cm dishes were lysed in IP buffer (50 mM Tris-Cl (pH  
578 8.0), 0.5% NP-40, 150 mM NaCl, 1 mM EGTA, 1 mM EDTA) containing phosphatase inhibitors  
579 (10 mM sodium pyrophosphate, 20 mM β-glycerophosphate, 100 mM NaF) and protease  
580 inhibitor cocktail (Roche Applied Science). Protein extracts were incubated with each antibody  
581 with rotation for 2 hr and then added to protein A/G agarose beads (Santa Cruz, sc-2003) for an  
582 additional 1 hr. The immunoprecipitates were washed three times with IP buffer and then  
583 resuspended in sample buffer for immunoblotting.

584 For immunoblotting, protein extracts were prepared in lysis buffer as described before  
585 <sup>54</sup>. Briefly, cells were lysed in lysis buffer (20 mM HEPES, 1% TX-100, 150 mM NaCl, 1 mM EGTA,  
586 1 mM EDTA) containing phosphatase inhibitors (10 mM sodium pyrophosphate, 20 mM β-  
587 glycerophosphate, 100 mM NaF, 5 mM IAA, 20 nM okadaic acid (OA)) and protease inhibitor  
588 cocktail. Solubilized proteins were collected by centrifugation and quantified using protein  
589 assay reagent (Bio-Rad). Samples containing equal amounts of protein were resolved by  
590 electrophoresis on a 8-10% gel and transferred to polyvinylidene difluoride membranes (Bio-  
591 Rad). Standard enhanced chemiluminescence (ECL) was used for film exposure, and an Azure or  
592 LI-COR machine was used to image the blot. ImageJ or LI-COR imaging software was used to  
593 quantify bands on the blots. To determine total O-GlcNAc levels, cells were lysed in RIPPA  
594 buffer with a Pierce™ protease inhibitor mini tablet and a Pierce™ phosphatase inhibitor mini

595 tablet (1 tablet per 10 mL of lysis buffer). The lysates were incubated on ice for 30 min and  
596 centrifuged at 13000 rpm for 10 min before immunoblotting.

597

#### 598 Immunofluorescence

599 Cells were plated in triplicate in 4 well culture slides. Wild-type or 6SA GFP-tagged SNAIL  
600 plasmid (0.75  $\mu$ g) was transiently transfected by using Lipofectamine 2000 overnight. Cells were  
601 fixed in 4% paraformaldehyde (PFA) for 30 minutes followed by four washes in ice cold PBS.  
602 After fixation of the cells, the localization of SNAIL proteins (green) and nuclei (blue;  
603 Hoechst 33342) were examined under a confocal microscope (Zeiss Lsm 700), in at least 40  
604 randomly selected fields at X400 magnification.

605

#### 606 Hexokinase activity assay

607 Hexokinase activity in whole-cell lysates and mitochondrial fractions was measured using a  
608 standard glucose-6-phosphate (G6P) dehydrogenase (G6PDH)-coupled spectrophotometric  
609 assay as described previously<sup>55</sup>. Whole-cell lysates were prepared by brief sonication in  
610 homogenization buffer containing 45 mM Tris-HCl, 50 mM KH<sub>2</sub>PO<sub>4</sub>, 10 mM glucose, and 0.5  
611 mM EGTA. Hexokinase activity was measured as the total glucose-phosphorylating capacity of  
612 whole-cell lysates in a final assay mixture containing 50 mM triethanolamine chloride, 7.5 mM  
613 MgCl<sub>2</sub>, 0.5 mM EGTA, 11 mM monothioglycerol, 4 mM glucose, 6.6 mM ATP, 0.5 mg/ml NADP,  
614 and 0.5 U/ml G6PDH, pH 8.5. Hexokinase activity in each sample was calculated as the coupled  
615 rate of NADPH formation by the Lambert-Beer law as follows:  $[(A_{340}/t)] \times \text{dilution}$   
616  $\text{factor}/[\text{protein}]$ , where  $(6.22 \text{ mM}^{-1}\text{cm}^{-1})$  is the extinction coefficient for NADPH at 340 nm  
617 ( $t$ =time,  $[\text{protein}]$ =protein concentration).

618

#### 619 Quantitation of G6P in cells by fluorometric assay

620 An enzymatic fluorometric assay to quantify G6P was performed following the method  
621 described previously<sup>56</sup> with minor modifications. Briefly, samples were extracted from  $5 \times 10^6$   
622 cells with MeOH/CHCl<sub>3</sub> and stored at -80°C. Just prior to the assay, the extracted samples were  
623 dissolved in 50  $\mu$ l of Millipore water, and then 10  $\mu$ l of each extraction sample were incubated

624 for 30 min at room temperature in a 96-well plate with 90  $\mu$ l of an assay cocktail containing 50  
625 mM triethanolamine (TEA, pH 7.6), 1.0 mM MgCl<sub>2</sub>, 100  $\mu$ M NADP<sup>+</sup>, 10  $\mu$ M resazurin, 1.5 U/ml  
626 G6PD, and 0.2 U/ml diaphorase). In this assay, G6P is oxidized by G6P dehydrogenase in the  
627 presence of NADP<sup>+</sup>, and stoichiometrically generated NADPH is then amplified by the  
628 diaphorase–resazurin system. Fluorescence at 590 nm was measured using excitation at 530  
629 nm. Background fluorescence was corrected by subtracting the value of the blank for each  
630 sample, and G6P concentrations were calculated from a standard curve. Fluorescence was  
631 measured using a Tecan Infinite M200 PRO plate reader in 96-well black assay plates.

632

### 633 Protein Stability Assays

634 For measuring MCL1 protein stability in M15-4 CHO cells and in M15-4 CHO cells expressing  
635 HK2 or for measuring endogenous SNAIL protein stability in 4T1 and 4T1shHK2 cells, cells were  
636 plated on 6-well plates at a seeding density of  $2 \times 10^5$  cells/well. Cells were treated with  
637 cycloheximide (100  $\mu$ M) for the indicated time points. For wild-type GFP-tagged or 6SA GFP-  
638 tagged SNAIL, 1.5 $\mu$ g of plasmid was transiently transfected by using Lipofectamine 2000  
639 overnight.

640

### 641 Enzyme-linked Immunosorbent Assay for Monitoring the HK2/PRKAR1a and HK2/GSK3b 642 Interaction

643 Enzyme-linked immunosorbent assays were conducted in Pierce Nickel (His) or Glutathione  
644 (GST) 96-well coated plates. The plates were respectively coated with His-PRKAR1a (50nM; Sino  
645 Biological) or GST-GSK3b (50nM; Abcam), in coating buffer (phosphate-buffered saline  
646 containing 0.5 mM phenylmethanesulfonyl fluoride and 1mM dithiothreitol) and incubated  
647 overnight at 4°C. Thereafter, unbound protein was removed by washing the wells three times  
648 with 100ul of washing buffer (phosphate-buffered saline containing 0.05% Tween 20) and  
649 blocking buffer (coating buffer containing 0.6% skimmed milk powder and 0.05% Tween 20)  
650 was added (100 ul, 1 h, room temperature). After removal, monitoring of interactions of  
651 PRKAR1a or GSK3b with HK2 was carried out in coating buffer and increasing concentration of  
652 Myc-HK2 protein (OriGene; 0-64nM, 40ul/well, 2h, room temperature). For G6P-induced

653 binding inhibition, 30minutes before the end of the incubation, G6P (0-100uM) is added directly  
654 to the wells. Unbound protein was removed by washing the wells three times with 100ul of  
655 washing buffer and bound Myc-HK2 was detected with monoclonal anti-Myc HRP-conjugated  
656 antibody (Abcam; 1:5000 in blocking buffer, 1h, room temperature). Bound PRKAR1a or GSK3b  
657 were detected by incubation with rabbit anti- PRKAR1a antibody (Cell Signaling; 1:2000 in  
658 blocking buffer) or mouse anti-GSK3b antibody (Millipore; 1:2000 in blocking buffer) and HRP-  
659 conjugated anti-rabbit or mouse IgG (1:3000, 1 h, room temperature). For each assay, non-  
660 specific binding is also conducted as described in figures.

661 Each antibody incubation step was followed by washing. The HRP reaction was initiated by  
662 addition of 3,3',5,5'-tetramethylbenzidine enzyme-linked immunosorbent assay substrate  
663 solution (Sigma) and terminated after 30 min by adding H2SO4 (2M; 50ul/well). The colored  
664 reaction product was quantified by measuring A450 nm in a Cytation 1 plate reader (Biotek).

665

#### 666 Enzyme-linked Immunosorbent Assay for Monitoring the PRKAR1a/HK2/GSK3b Interaction

667 Binding assay is conducted on Pierce Nickel-coated 96 well plates and after successive  
668 incubation with His-PRKAR1a and Myc-HK2 as described above, unbound proteins will be  
669 washed and blocking buffer will be added for 1h at room temperature. Thereafter, GST-GSK3b  
670 is added at increasing concentration (0-64nM; 40ul/well, 2h, room temperature). For G6P-  
671 induced binding inhibition, 30minutes before the end of the incubation, G6P (0-1000uM) is  
672 added directly to the wells. Unbound protein was removed by washing the wells as described  
673 above and bound GST-GSK3b was detected with monoclonal anti-GST HRP-conjugated antibody  
674 (Abcam; 1:5000 in blocking buffer, 1h, room temperature). Bound PRKAR1a or HK2 were  
675 detected by incubation with rabbit anti- PRKAR1a antibody (Cell Signaling; 1:2000 in blocking  
676 buffer) or rabbit anti-HK2 antibody (Cell Signaling; 1:2000 in blocking buffer) and HRP-  
677 conjugated anti-rabbit IgG (1:3000, 1 h, room temperature). For each assay, non-specific  
678 binding is also conducted as described in figures and HRP reaction is conducted as described  
679 above.

680

#### 681 Monitoring of GSK3 phosphorylation in the HK2/PRKAR1 $\alpha$ /GSK3 $\beta$ complex



682 Enzyme-linked immunosorbent assays were conducted in Pierce Nickel- 8-well-strip coated  
683 plates. The plates were coated with His-HK2 (50nM; Creative Biomart) in coating buffer and  
684 incubated overnight at 4°C. Unbound proteins is then washed and blocking buffer is added for  
685 1h at room temperature. Thereafter, Myc-PRKAR1 $\alpha$  (32nM; Creative Biomart), PKAc (20nM;  
686 Promega) and GST-GSK3 $\beta$  (32nM; Abcam) successively, each for 1h incubation at room  
687 temperature, and unbound protein will be carefully washed after each incubation. After all  
688 proteins are bound, kinase buffer (1mM ATP and 10mM MgCl<sub>2</sub> in Tris 20mM, pH7.4) with or  
689 without cyclic AMP (10 $\mu$ M) is added to all appropriate wells (1h; room temperature). After  
690 incubation, kinase buffer is washed and appropriate antibody will be added to the wells de  
691 detect bound proteins (P-GSK3 $\beta$ , total GSK3, PRKAR1 $\alpha$ , HK2 and PKAc) and incubated overnight  
692 at 4°C. After washing, total bound GST-GSK3 $\beta$  was detected with monoclonal anti-GST HRP-  
693 conjugated antibody, and bound P-GSK3 $\beta$ , PRKAR1 $\alpha$ , HK2 and PKAc antibodies are detected  
694 with HRP-conjugated anti-rabbit IgG (1:3000, 2h, room temperature). The HRP reaction is  
695 conducted as described above.

696 For G6P-induced binding inhibition, G6P (1mM) is added 30minutes before the end of the  
697 incubation with GST-GSK3 $\beta$ , before the addition of kinase buffer.

698 Negative control reactions are conducted as described above, in absence of His-HK2 or Myc-  
699 PKAR1 $\alpha$ .

700

#### 701 Enzyme-linked Immunosorbent Assay for Monitoring the PRKAR1 $\alpha$ /HK2 Interaction in presence 702 of FMP-API-1

703 Binding assay is conducted on Pierce Nickel-coated 8-well strip plates and after successive  
704 incubation with His-PRKAR1 $\alpha$  and Myc-HK2 as described above, unbound proteins will be  
705 washed and blocking buffer will be added for 1h at room temperature. Thereafter, FMP-API-1 is  
706 added directly to the wells 30minutes before the end of the incubation with Myc-HK2 at  
707 increasing concentration (0-1000uM). Unbound protein was removed by washing the wells as  
708 described above and bound Myc-HK2 was detected with monoclonal anti-Myc HRP-conjugated  
709 antibody (Abcam; 1:5000 in blocking buffer, 1h, room temperature). HRP reaction is then  
710 conducted as described above.

711

712 Metabolic labelling

713 For metabolic tracing in A549 cells ,  $7.0 \times 10^5$  cells were plated onto 6 well plates for next day  
714 pulse-labeling with either 25 mM [1,2- $^{13}\text{C}$ ] glucose (Cambridge Isotope Laboratories). Isotope  
715 labeling experiments were performed for 4 hours and extra plates were included for cell  
716 counts. At the time of collection, plates were washed twice with 1 mL of (9 g/L) NaCl. Then,  
717 cells were incubated with 600  $\mu\text{L}$  mixed solvent (water:methanol:acetonitrile = 1:1:1)  
718 containing 2  $\mu\text{L}$  of 2 mg/mL Norvaline (SigmaAldrich) dissolved in distilled water as an internal  
719 standard, and then scraped down with cell scrapers. The solution was shaken at 1,200 rpm for  
720 30 min and centrifuged at  $16,000 \times g$  for 15 min at 4 °C. The supernatant (280  $\mu\text{L}$ ) was  
721 transferred to a clean tube and lyophilized under nitrogen gas. The lyophilized samples were  
722 derivatized with 15  $\mu\text{L}$  of 2 wt% methoxylamine hydrochloride (Thermo Fisher) for 60 min at 42  
723 °C. Next, 35  $\mu\text{L}$  of N-methyl-N-(tert-butyldimethylsilyl)-trifluoroacetamide (MTBSTFA) + 1% tert-  
724 butyldimethylchlorosilane (t-BDMCS) (SigmaAldrich) was added and the samples were  
725 incubated for 60 min at 75 °C. The derivatized samples were then centrifuged at  $16,000 \times g$  for  
726 5 min at 4 °C, and the supernatant (1  $\mu\text{L}$ ) was subjected to GC-MS measurement.

727 GC-MS analysis was performed using an Agilent 7890B GC equipped with a DB-5ms  
728 column (30 m  $\times$  0.25-mm inner diameter; film thickness, 0.25  $\mu\text{m}$ ; Agilent J&W Scientific). The  
729 front inlet temperature was 280 °C and helium flow was maintained at 1.428 mL/min. For  
730 intracellular lactate analysis, the column temperature was held at 60 °C for 1 minute followed  
731 by 1-minute of run time, rising at 10 °C/minute to 320 °C and holding for 1 minutes followed by  
732 a post run of 320 °C for 9 minutes. For the analysis of G6P and 6PG, the initial rate was held at  
733 60 °C for 1 minute followed by 1-minute of run time, rising at 10 °C/minute to 325 °C and  
734 holding for 10 minutes followed by a post run of 60 °C for 1 minutes<sup>57, 58</sup>. The peak area of each  
735 quantified ion was calculated and corrected for natural isotope abundances by following the  
736 procedure by Fernandez et al<sup>59</sup>, and then normalized by the peak area of norvaline as an  
737 internal standard and cell number.

738 For metabolic tracing, in 4T1 and 4T1shHK2 cells, the cells were plated on 6cm plate in  
739 triplicate ( $3 \times 10^5$ ) in 5mM glucose DMEM media for 48 hours. Cells were washed in PBS and

740 5mM of uniformly labeled C-13 glucose in DMEM with 10% dialyzed FBS was added for 5  
741 minutes following extraction in 1mL of cold 90/10 acetonitrile/water. Cells were collected using  
742 a cell scraper, vortexed for 2 minutes, and centrifuged at highest speed for 5 minutes. The  
743 supernatant was transferred to clean eppendorf tube and sent to MD Anderson Cancer Center's  
744 Proteomics and Metabolomics Core Facility for analysis by Ion chromatography mass  
745 spectrometry (IC-MS). One 6cm plate was collected for western blot. Cell number was counted  
746 on extra 6 well plate and protein concentration was quantified with remaining cell pellet.

747

#### 748 Extracellular lactate measurements

749 Extracellular lactate concentrations were measured using a YSI 2700 Bioanalyzer (YSI).

750

#### 751 Mouse strains and treatment protocol

752 C57BL/6 *MMTV-PyMT* and *HK2<sup>ff</sup>;UBC-Cre<sup>ERT2</sup>* mice were previously described <sup>35</sup>. *MMTV-*  
753 *PyMT;HK2<sup>ff</sup>* mice were crossed with *HK2<sup>ff</sup>;UBC-Cre<sup>ERT2</sup>* or *HK2<sup>ff</sup>* mice to generate experimental  
754 and control mice on a C57BL/6 background. Once a primary tumor was palpable (~12 weeks  
755 old), 0.1 ml of 30 mg/ml tamoxifen was injected IP for 7 consecutive days to systemically delete  
756 HK2 as previously described <sup>35</sup>. At the tumor end point (20% weight loss from baseline, 15%  
757 weight gain compared to aged-matched controls, tumor size greater than 15% of the body  
758 weight, tumor mass > 2 cm, tumor ulceration, pallor, respiratory distress, or inability to  
759 ambulate), the mice were euthanized, and their lungs were analyzed for metastases.

760 *MMTV-rtTA* and *LSL-luc* mice were purchased from Jackson Laboratory.

761 *MMTV-PyMT;Hk2<sup>ff</sup>;LSL.Luc;MMTV.rtTATet(O)Cre* mice were generated by first crossing *MMTV-*  
762 *rtTA* mice with *LSL.Luc* mice to generate *MMTV-rtTA:LSL.Luc* mice. These mice were crossed  
763 with *MMTV-PyMT;Hk2<sup>ff</sup>* mice.

764 Balb/cJ mice were purchased from Jackson Laboratory and NOD.Cg-Prkdcscid (NOD-F) mice  
765 from TACONIC.

#### 766 Histochemistry

767 Mammary tumor tissues and PBS-inflated lung lobes were collected, and macroscopic lung  
768 lesions were counted visually. The tissues were fixed in 10% formalin for 48 hr. Tissues were  
769 paraffin embedded and sectioned for hematoxylin and eosin (H&E) staining (5- $\mu$ m sections).  
770 Microscopic lung lesions were counted using a microscope.

771

#### 772 Primary tumor isolation and processing

773 Tumors isolated from MMTV-PyMT mice were isolated for scRNA-seq, western blotting, and  
774 orthotopic transplantation. The mice were sacrificed close to the tumor end point (primary  
775 tumor >2 cm). Primary tumors were dissected and washed several times in PBS with 1 $\times$   
776 pen/strep. The tumors were chopped into 1-mm pieces with a sterile scalpel and placed in  
777 collagenase for 1 hr at 37°C on a shaker. The collagenase mixture consisted of 10% type IV  
778 collagenase and 1% DNase dissolved and sterile filtered in DMEM. After digestion, the cells  
779 were spun for 5 min at 1000 rpm. The supernatant was aspirated, and 2 ml of ACK lysis buffer  
780 was used to resuspend the pellet for 2 min. The mixture was centrifuged again, and the pellet  
781 was washed in DMEM or PBS at least twice before proceeding with the experiment. For scRNA-  
782 seq, the pellet was resuspended in PBS and filtered through a 40- $\mu$ m filter to isolate single cells  
783 for sequencing. The cells were counted with trypan blue staining to determine cell viability  
784 before proceeding with the Drop-seq protocol as previously described<sup>39-41, 60</sup>.

785

#### 786 Single Cell RNA-seq and bioinformatics

787 For scRNA-seq, the PyMT tumors were isolated as described in the section regarding primary  
788 tumor isolation and processing. The pellet was resuspended in PBS and filtered through a 40-  
789  $\mu$ m filter to isolate single cells for sequencing. The cells were counted with trypan blue staining  
790 to determine cell viability before proceeding with the Drop-seq protocol<sup>38</sup>. To isolate single-cell  
791 droplets,  $1.65 \times 10^5$  cells were resuspended in 1.5 ml of 0.1% BSA PBA and loaded on a  
792 microfluidic chip. Cells were lysed in the droplet, and mRNA was bound to a unique molecular  
793 identifier (UMI) on barcoded beads. The individual droplets were broken down and pooled in a  
794 reverse transcriptase mixture. Single-cell transcriptomes attached to microparticles (STAMPS)  
795 were created by reverse transcription. The STAMPS were PCR amplified, and unhybridized DNA

796 was removed with exonuclease I treatment. The UIC Research Resources Center (RRC) used  
797 TapeStation and Qubit to check the cDNA quality and quantity of the amplified products. The  
798 Nextera XT kit was used to make the libraries, which were then sequenced by an Illumina  
799 NextSeq 500. The raw sequence data were filtered and aligned to the mouse genome (mm10)  
800 with the addition of the PyMT gene sequence to help identify positive tumor cells. The digital  
801 expression matrix file containing UMIs were analyzed with the Seurat package version 2.3.4<sup>61</sup> R  
802 version 3.5.3, and clusters were grouped based on similar gene expression.

803

#### 804 Quantitative RT-PCR

805 Total RNA was extracted with TRIzol reagent (Invitrogen) or a Qiagen RNeasy mini kit.  
806 Quantitative PCR was performed with a BIO-RAD iTaq Universal SYBR Green One-Step Kit and  
807 system. Each sample was prepared in triplicate and normalized to B-actin mRNA levels.

808

#### 809 Orthotopic transplantation

810 Cells from *MMTV-PyMT;HK2<sup>ff</sup>* mice were isolated as described above. The pellet was  
811 resuspended in PBS and filtered through a 75- $\mu$ m filter before the cells were plated in 10% FBS,  
812 1% pen/strep, and high-glucose DMEM. The cells were then infected with either adenovirus  
813 expressing GFP or adenovirus expressing GFP-Cre at a MOI of 1000 to delete HK2. Deletion of  
814 HK2 was verified via western blotting. The cells were orthotopically transplanted into the  
815 mammary fat pads of NOG-F mice. Briefly, the cells were trypsinized, resuspended, and  
816 counted with trypan blue staining to determine cell viability and number. Cells ( $1 \times 10^5$ ) were  
817 resuspended in 100  $\mu$ l of a 1:1 mixture of PBS and Matrigel (Corning). They were then  
818 transplanted into the fourth mammary fat pads of NOG-F mice. Similarly, approximately  $5 \times 10^5$   
819 4T1 and 4T1shHK2 cells resuspended in 100  $\mu$ l of a 1:1 mixture of PBS and Matrigel (Corning)  
820 were transplanted into the fourth mammary fat pads of syngeneic Balb/cJ mice. The recipient  
821 mice were monitored until they reached the tumor end point. The lungs were then isolated and  
822 processed for H&E staining to quantify lung metastasis. Finally,  $5 \times 10^4$  cells of 4T1shHK2 with  
823 dox inducible Empty Vector or 6SA-SNAIL cells were resuspended in 100ul of 1:1 in PBS and  
824 Matrigel (Corning) mixture and transplanted into the fourth mammary fat pad of syngeneic

825 Balb/cJ mice. The following day DOX (1ml/ml in water with 5% sucrose) was added to both  
826 groups of mice for 1 week. The recipient mice were monitored until they reached tumor end-  
827 point and lungs were isolated and processed for H&E stain to quantify lung metastasis.

828

829 Transwell migration and invasion assays

830 For the transwell migration assay,  $1 \times 10^5$  cells in 200  $\mu$ l were incubated in 24-plate chamber  
831 wells containing a 8.0- $\mu$ m filter in high-glucose DMEM with 0% serum. The lower chamber  
832 contained 750  $\mu$ l of high-glucose DMEM with 20% serum as a stimulant. After 12 hr, the cells  
833 were washed twice in PBS, and the nonmigrated cells were scraped away with a cotton swab.  
834 The cells were fixed in methanol and stained with crystal violet. Migrated cells in five random  
835 fields were counted with ImageJ. For the transwell invasion assay,  $1 \times 10^5$  cells in 500  $\mu$ l were  
836 incubated in gel-coated 24-plate chamber wells containing a 8.0- $\mu$ m filter in DMEM containing  
837 5 mM glucose and 0% serum. The lower chamber contained 750  $\mu$ l of DMEM containing 5 mM  
838 glucose and 20% serum as a stimulant. After 24 hr, the cells were washed twice in PBS, and the  
839 nonmigrated cells were scraped away with a cotton swab. The cells were fixed with methanol  
840 and stained with crystal violet. Migrated and invaded cells in ten random fields were counted  
841 with ImageJ.

842

843

844

845

| REAGENTS or RESOURCES                        | SOURCE         | IDENTIFIER |
|----------------------------------------------|----------------|------------|
| <b>Antibodies</b>                            |                |            |
| Rabbit monoclonal Hexokinase II (C64G5)      | Cell signaling | 2867       |
| HXK II (C-14) (used for immunoprecipitation) | Santa Cruz     | sc-6521    |
| Mouse monoclonal E-cadherin (4A2)            | Cell signaling | 14472      |
| Rabbit monoclonal Vimentin (D12H3)           | Cell signaling | 5741       |
| Rabbit monoclonal Snail (C15D3)              | Cell           | 3879       |

|                                          |                |         |
|------------------------------------------|----------------|---------|
|                                          | signaling      |         |
| Mouse monoclonal B-actin (AC-15)         | Sigma-Aldrich  | A5441   |
| Rabbit polyclonal Phopsho-GSK3b (Ser9)   | Cell signaling | 9336    |
| Mouse monoclonal Total GSK3b (4G-1E)     | Millipore      | 05-412  |
| p-GSK3a/b antibody                       | Cell signaling | 9331    |
| GSK3a/b                                  | Biosource      | 44-610  |
| AMPK antibody                            | Cell signaling | 2532    |
| p-ACC antibody                           | Cell signaling | 3661    |
| Mcl-1                                    | Santa Cruze    | Sc-819  |
| HA-Tag (262) monoclonal antibody         | Cell signaling | 2362    |
| Myc-Tag (9B11) mouse monoclonal antibody | Cell signaling | 2276    |
| Myc Tag Monoclonal Antibody,HRP          | Invitrogen     | R951-25 |
| PRKAR1a (D5405) Rabbit mAb               | Cell signaling | 5675    |
| Anti-Myc Tag Monoclonal Antibody, HRP    | Invitrogen     | R951-25 |
| Anti-cPKA antibody                       | Cell Signaling | 4782    |
| PP2A C subunit Antibody                  | Cell signaling | 2492    |
| NRF2(D1Z9C)<br>Rabbit mAb                | Cell Signaling | 12721   |
| Akt (pan) (11E7) Rabbit mAb              | Cell signaling | 4685    |
| p-Akt (ser473) (193H12) Rabbit mAb       | Cell signaling | 4085    |
| Mouse monoclonal O-GlcNAc (CTD110.6)     | Biolegend      | 38004   |
| Mouse monoclonal $\alpha$ -Tubulin       | Sigma-Aldrich  | T9026   |

|                                                          |                  |               |
|----------------------------------------------------------|------------------|---------------|
| b-Actin (13E5) Rabbit mAb                                | Cell signaling   | 4970          |
| G6PD                                                     | Bethyl           | A300-404A     |
| 6PGD                                                     | Gene Tex         | GTX101703     |
| Anti-GST (HRP)                                           | Abcam            | ab58626       |
| <b>Recombinant proteins</b>                              |                  |               |
| Recombinant Human PRKAR1A, His tagged                    | Creative Biomart | PRKAR1A-333H  |
| Recombinant Human PRKAR1A Protein, MYC/DDK-tagged        | Creative Biomart | PRKAR1A-2951H |
| Recombinant Human Hexokinase II (HK2), C-Myc/DDK tagged  | OriGene          | TP309482      |
| Recombinant Human Hexokinase 2, His-tagged, active       | Creative Biomart | HK2-41H       |
| Recombinant human GSK3 beta protein (Active), GST tagged | Abcam            | ab60863       |
| cPKA (cAMP-dependent PK, catalytic subunit)              | Promega          | V5161         |
| <b>Chemicals and Enzymes</b>                             |                  |               |
| 6-AN (6-Aminonicotinamide)                               | Sigma-Aldrich    | A68203        |
| DHEA                                                     | Sigma-Aldrich    | D4000         |
| 2DG (2-Deoxy-D-glucose)                                  | Sigma-Aldrich    | D6134         |
| 5-thio-D-glucose                                         | Sigma-Aldrich    | 88635-1G      |
| AICAR                                                    | Tocris           | 2840          |
| 2',5'-Dideoxyadenosine                                   | Sigma-Aldrich    | D7408         |
| cAMP                                                     | ACROS Organics   | AC225805000   |
| ATP                                                      | Millipore-Sigma  | A2383         |
| MgCl <sub>2</sub>                                        | Millipore-Sigma  | M1028         |



|                                                                           |                 |         |           |
|---------------------------------------------------------------------------|-----------------|---------|-----------|
| LY294002                                                                  | Sigma-Aldrich   | L9908   |           |
| Okadaic Acid                                                              | Sigma-Aldrich   | O9381   |           |
| Tautomycetin                                                              | Tocris          | 2305    |           |
| CHX (cycloheximide)                                                       | Sigma-Aldrich   |         | C1988     |
| Doxycycline                                                               | Sigma-Aldrich   |         | D9891     |
| DMSO                                                                      | Fisher          |         | BP231     |
| Puromycin                                                                 | Acros Organics  |         | 227420100 |
| Blasticidin                                                               | Gibco           |         | R21001    |
| Lipofectatime 2000                                                        | Invitrogen      |         | 11668     |
| Matrigel® Growth Factor Reduced (GFR) Basement Membrane Matrix, LDEV-free | Corning         |         | 354230    |
| Tamoxifen                                                                 | Sigma-Aldrich   |         | T5648     |
| H89                                                                       | Tocris          | 5702541 |           |
| LB100                                                                     | APExBIO         | B4846   |           |
| Glucose                                                                   | Sigma           |         | G7021     |
| D-GLUCOSE (U-13C6, 99%)                                                   | Cambridge       | 42-3    | 110187-   |
| D-GLUCOSE (1,2-13C2, 99%)                                                 | Cambridge       | 87-5    | 138079-   |
| Collagenase, Type 4                                                       | Worthington     |         | Ls004188  |
| Deoxyribonuclease I                                                       | Worthington     |         | LS002139  |
| 3, 3',5, 5'-Tetramethylbenzidine Liquid Substrate                         | Millipore-Sigma |         | T4444     |
| FMP-API-1                                                                 | Millipore-Sigma |         | SML0380   |
| <b>Commercial Assays and KITS</b>                                         |                 |         |           |

|                                                                                                               |                 |                                                                                                                       |
|---------------------------------------------------------------------------------------------------------------|-----------------|-----------------------------------------------------------------------------------------------------------------------|
| Corning® BioCoat™ Control Inserts with 8.0 µm PET Membrane in two 24-well Plate                               | Corning         | 354578                                                                                                                |
| Corning® BioCoat™ Growth Factor Reduced Matrigel Invasion Chamber with 8.0 µm PET Membrane in two 24 W Plates | Corning         | 354483                                                                                                                |
| Thincert cell culture inset for 24 well plates, TC, Sterile, Translucent membrane PET, 8µm                    | Greiner bio-one | 662638                                                                                                                |
| <b>Software and Algorithms</b>                                                                                |                 |                                                                                                                       |
| Prism 6.0                                                                                                     |                 | <a href="https://www.graphpad.com/scientific-software/prism/">https://www.graphpad.com/scientific-software/prism/</a> |
| R                                                                                                             |                 | <a href="https://rstudio.com/products/rstudio/download/">https://rstudio.com/products/rstudio/download/</a>           |
|                                                                                                               |                 |                                                                                                                       |

846

847

848

849 **PRIMERS**

**Q-RT-PCR**

R

F

|            |                         |                       |
|------------|-------------------------|-----------------------|
| HK2        | AACCGCCTAGAAATCTCCAGA   | TGATCGCCTGCTTATTCACGG |
| Vimentin   | TTGAGTGGGTGTCAACCAGA    | CCAACCTTTTCTTCCCTGAA  |
| E-cadherin | TACACGCTGGGCAACATGAGC   | CGACCCTGCCTCTGAATCC   |
| SNAIL      | GGCTTCTCACCAGTGTGGGT    | CTCTGAAGATGCACATCCGAA |
| B-actin    | TGTTGGCATAGAGGTCTTTACGG | CTGAGAGGGAAATCGTGCGT  |

**Genotype Primers**

|              |                          |                           |
|--------------|--------------------------|---------------------------|
| HK2 F/F      | CCCCTTCGCTTGCCATTAC      | TGTCTTGGCTCAGATGTGAC      |
| Deleted HK2  |                          |                           |
| F/F          | CCCCTTCGCTTGCCATTAC      | TGTCTTGGCTCAGATGTGAC      |
| UBC-CRE-ERT2 | CTAGGCCACAGAATTGAAAGATCT | GTAGGTGGAAATTCTAGCATCATCC |
| MMTV-PyMT    | CAAATGTTGCTTGTCTGGTG     | GTCAGTCGAGTGCACAGTTT      |

**Plasmid Cloning**

|            |                                      |                                      |
|------------|--------------------------------------|--------------------------------------|
| Flag-SNAIL | CCTGGAGAATTGGCTAGCATGGATTACAAGGATGAC | AACCCCAACCCCGGATCCTCAGCGGGGACATCCTGA |
| PCW vector |                                      |                                      |

850

851

852

853

854

855

**Acknowledgments**

856

N.H. acknowledges the support from NIH grants R01AG016927, R01CA090764, and R01

857

CA206167, the VA merit award BX000733, and the VA research career scientist award

858

IK6BX004602. C.B acknowledges the support from F30CA228191. H.R. acknowledges the

859

support from the center for clinical and translational science. A.R.T. acknowledges the support

860

from F30CA225058. M.V.F. acknowledges the support from NIH grant R35GM131707. We would

861

like to thank Ling Jin for maintaining and genotyping the mice.

862

863

864           References

865

- 866           1.     Hay, N. Reprogramming glucose metabolism in cancer: can it be exploited for cancer  
867           therapy? *Nat Rev Cancer* **16**, 635-649 (2016).
- 868           2.     Robey, R.B. & Hay, N. Mitochondrial hexokinases, novel mediators of the antiapoptotic  
869           effects of growth factors and Akt. *Oncogene* **25**, 4683-4696 (2006).
- 870           3.     Patra, K.C. *et al.* Hexokinase 2 is required for tumor initiation and maintenance and its  
871           systemic deletion is therapeutic in mouse models of cancer. *Cancer Cell* **24**, 213-228  
872           (2013).
- 873           4.     DeWaal, D. *et al.* Hexokinase-2 depletion inhibits glycolysis and induces oxidative  
874           phosphorylation in hepatocellular carcinoma and sensitizes to metformin. *Nat Commun* **9**,  
875           446 (2018).
- 876           5.     Lin, H. *et al.* Discovery of a Novel 2,6-Disubstituted Glucosamine Series of Potent and  
877           Selective Hexokinase 2 Inhibitors. *ACS Med Chem Lett* **7**, 217-222 (2016).
- 878           6.     Magnani, M., Stocchi, V., Serafini, G. & Chiarantini, L. The interaction of  
879           phosphorylated sugars with human hexokinase I. *Biochim Biophys Acta* **954**, 336-342  
880           (1988).
- 881           7.     Sui, D. & Wilson, J.E. Structural determinants for the intracellular localization of the  
882           isozymes of mammalian hexokinase: intracellular localization of fusion constructs  
883           incorporating structural elements from the hexokinase isozymes and the green fluorescent  
884           protein. *Arch Biochem Biophys* **345**, 111-125. (1997).
- 885           8.     Cross, D.A., Alessi, D.R., Cohen, P., Andjelkovich, M. & Hemmings, B.A. Inhibition of  
886           glycogen synthase kinase-3 by insulin mediated by protein kinase B. *Nature* **378**, 785-  
887           789 (1995).
- 888           9.     Doble, B.W. & Woodgett, J.R. GSK-3: tricks of the trade for a multi-tasking kinase. *J*  
889           *Cell Sci* **116**, 1175-1186 (2003).
- 890           10.    Fang, X. *et al.* Phosphorylation and inactivation of glycogen synthase kinase 3 by protein  
891           kinase A. *Proc Natl Acad Sci U S A* **97**, 11960-11965 (2000).
- 892           11.    Stambolic, V. & Woodgett, J.R. Mitogen inactivation of glycogen synthase kinase-3 beta  
893           in intact cells via serine 9 phosphorylation. *Biochem J* **303** ( Pt 3), 701-704 (1994).
- 894           12.    Sutherland, C., Leighton, I. & Cohen, P. Inactivation of glycogen synthase kinase-3 beta  
895           by phosphorylation: new kinase connections in insulin and growth-factor signalling.  
896           *Biochemical Journal* **296** 15-19 (1993).
- 897           13.    Bennechib, M., Gong, C.X., Grundke-Iqbal, I. & Iqbal, K. Role of protein phosphatase-2A  
898           and -1 in the regulation of GSK-3, cdk5 and cdc2 and the phosphorylation of tau in rat  
899           forebrain. *FEBS Lett* **485**, 87-93 (2000).
- 900           14.    Robertson, H., Hayes, J.D. & Sutherland, C. A partnership with the proteasome; the  
901           destructive nature of GSK3. *Biochem Pharmacol* **147**, 77-92 (2018).
- 902           15.    Maurer, U., Charvet, C., Wagman, A.S., Dejardin, E. & Green, D.R. Glycogen synthase  
903           kinase-3 regulates mitochondrial outer membrane permeabilization and apoptosis by  
904           destabilization of MCL-1. *Mol Cell* **21**, 749-760 (2006).
- 905           16.    Hayes, J.D., Chowdhry, S., Dinkova-Kostova, A.T. & Sutherland, C. Dual regulation of  
906           transcription factor Nrf2 by Keap1 and by the combined actions of beta-TrCP and GSK-  
907           3. *Biochem Soc Trans* **43**, 611-620 (2015).

- 908 17. Rada, P. *et al.* Structural and functional characterization of Nrf2 degradation by the  
909 glycogen synthase kinase 3/beta-TrCP axis. *Mol Cell Biol* **32**, 3486-3499 (2012).
- 910 18. Zhou, B.P. *et al.* Dual regulation of Snail by GSK-3beta-mediated phosphorylation in  
911 control of epithelial-mesenchymal transition. *Nat Cell Biol* **6**, 931-940 (2004).
- 912 19. Cormier, K.W. & Woodgett, J.R. Recent advances in understanding the cellular roles of  
913 GSK-3. *F1000Res* **6** (2017).
- 914 20. O'Rear, J.L., Scoocca, J.R., Walker, B.K., Kaiden, A. & Krag, S.S. Chinese hamster ovary  
915 cells with reduced hexokinase activity maintain normal GDP-mannose levels. *J Cell*  
916 *Biochem* **72**, 56-66 (1999).
- 917 21. Ardehali, H. *et al.* Functional organization of mammalian hexokinase II. Retention of  
918 catalytic and regulatory functions in both the NH<sub>2</sub>- and COOH-terminal halves. *J Biol*  
919 *Chem* **271**, 1849-1852 (1996).
- 920 22. McCubrey, J.A. *et al.* GSK-3 as potential target for therapeutic intervention in cancer.  
921 *Oncotarget* **5**, 2881-2911 (2014).
- 922 23. Medina, M. & Wandosell, F. Deconstructing GSK-3: The Fine Regulation of Its Activity.  
923 *Int J Alzheimers Dis* **2011**, 479249 (2011).
- 924 24. Taylor, S.S. *et al.* Dynamics of signaling by PKA. *Biochim Biophys Acta* **1754**, 25-37  
925 (2005).
- 926 25. Kim, C., Xuong, N.H. & Taylor, S.S. Crystal structure of a complex between the catalytic  
927 and regulatory (RIalpha) subunits of PKA. *Science* **307**, 690-696 (2005).
- 928 26. Hundsrucker, C. *et al.* Glycogen synthase kinase 3beta interaction protein functions as an  
929 A-kinase anchoring protein. *J Biol Chem* **285**, 5507-5521 (2010).
- 930 27. Omar, M.H. & Scott, J.D. AKAP Signaling Islands: Venues for Precision Pharmacology.  
931 *Trends Pharmacol Sci* **41**, 933-946 (2020).
- 932 28. Christian, F. *et al.* Small molecule AKAP-protein kinase A (PKA) interaction disruptors  
933 that activate PKA interfere with compartmentalized cAMP signaling in cardiac myocytes.  
934 *J Biol Chem* **286**, 9079-9096 (2011).
- 935 29. Wick, A.N., Drury, D.R., Nakada, H.I. & Wolfe, J.B. Localization of the primary  
936 metabolic block produced by 2-deoxyglucose. *J Biol Chem* **224**, 963-969 (1957).
- 937 30. Kahana, S.E., Lowry, O.H., Schulz, D.W., Passonneau, J.V. & Crawford, E.J. The  
938 kinetics of phosphoglucoisomerase. *J Biol Chem* **235**, 2178-2184 (1960).
- 939 31. Gaitonde, M.K., Murray, E. & Cunningham, V.J. Effect of 6-phosphogluconate on  
940 phosphoglucose isomerase in rat brain in vitro and in vivo. *J Neurochem* **52**, 1348-1352  
941 (1989).
- 942 32. Rada, P. *et al.* SCF/{beta}-TrCP promotes glycogen synthase kinase 3-dependent  
943 degradation of the Nrf2 transcription factor in a Keap1-independent manner. *Mol Cell*  
944 *Biol* **31**, 1121-1133 (2011).
- 945 33. Tanji, C. *et al.* A-kinase anchoring protein AKAP220 binds to glycogen synthase kinase-  
946 3beta (GSK-3beta) and mediates protein kinase A-dependent inhibition of GSK-3beta. *J*  
947 *Biol Chem* **277**, 36955-36961 (2002).
- 948 34. Whiting, J.L. *et al.* Protein Kinase A Opposes the Phosphorylation-dependent  
949 Recruitment of Glycogen Synthase Kinase 3beta to A-kinase Anchoring Protein 220. *J*  
950 *Biol Chem* **290**, 19445-19457 (2015).
- 951 35. Patra, K.C. *et al.* Hexokinase 2 is required for tumor initiation and maintenance and its  
952 systemic deletion is therapeutic in mouse models of cancer. *Cancer Cell* **24**, 213-228  
953 (2013).

- 954 36. Palmieri, D. *et al.* Analyses of resected human brain metastases of breast cancer reveal  
955 the association between up-regulation of hexokinase 2 and poor prognosis. *Mol Cancer*  
956 *Res* **7**, 1438-1445 (2009).
- 957 37. Lin, E.Y. *et al.* Progression to malignancy in the polyoma middle T oncoprotein mouse  
958 breast cancer model provides a reliable model for human diseases. *Am J Pathol* **163**,  
959 2113-2126 (2003).
- 960 38. Macosko, E.Z. *et al.* Highly Parallel Genome-wide Expression Profiling of Individual  
961 Cells Using Nanoliter Droplets. *Cell* **161**, 1202-1214 (2015).
- 962 39. Ariss, M.M., Islam, A., Critcher, M., Zappia, M.P. & Frolov, M.V. Single cell RNA-  
963 sequencing identifies a metabolic aspect of apoptosis in Rbf mutant. *Nat Commun* **9**,  
964 5024 (2018).
- 965 40. Chen, X. *et al.* Cell autonomous versus systemic Akt isoform deletions uncovered new  
966 roles for  
967 Akt1 and Akt2 in breast cancer. *bioRxiv preprint* doi: <https://doi.org/10.1101/2020.01.08.898767>  
968 (2020).
- 969 41. Chen, X. *et al.* Cell-Autonomous versus Systemic Akt Isoform Deletions Uncovered New  
970 Roles for Akt1 and Akt2 in Breast Cancer. *Mol Cell* (2020).
- 971 42. De Craene, B. *et al.* The transcription factor snail induces tumor cell invasion through  
972 modulation of the epithelial cell differentiation program. *Cancer Res* **65**, 6237-6244  
973 (2005).
- 974 43. Come, C. *et al.* Snail and slug play distinct roles during breast carcinoma progression.  
975 *Clin Cancer Res* **12**, 5395-5402 (2006).
- 976 44. Martinez-Estrada, O.M. *et al.* The transcription factors Slug and Snail act as repressors of  
977 Claudin-1 expression in epithelial cells. *Biochem J* **394**, 449-457 (2006).
- 978 45. Ni, T. *et al.* Snail1-dependent p53 repression regulates expansion and activity of tumour-  
979 initiating cells in breast cancer. *Nat Cell Biol* **18**, 1221-1232 (2016).
- 980 46. Tran, H.D. *et al.* Transient SNAIL1 expression is necessary for metastatic competence in  
981 breast cancer. *Cancer Res* **74**, 6330-6340 (2014).
- 982 47. Aslakson, C.J. & Miller, F.R. Selective events in the metastatic process defined by  
983 analysis of the sequential dissemination of subpopulations of a mouse mammary tumor.  
984 *Cancer Res* **52**, 1399-1405 (1992).
- 985 48. Sodi, V.L. *et al.* Nutrient sensor O-GlcNAc transferase controls cancer lipid metabolism  
986 via SREBP-1 regulation. *Oncogene* **37**, 924-934 (2018).
- 987 49. Park, S.Y. *et al.* Snail1 is stabilized by O-GlcNAc modification in hyperglycaemic  
988 condition. *EMBO J* **29**, 3787-3796 (2010).
- 989 50. Nogueira, V., Patra, K.C. & Hay, N. Selective eradication of cancer displaying  
990 hyperactive Akt by exploiting the metabolic consequences of Akt activation. *Elife* **7**  
991 (2018).
- 992 51. Ma, Y. & Taylor, S. A 15-residue bifunctional element in D-AKAP1 is required for both  
993 endoplasmic reticulum and mitochondrial targeting. *J Biol Chem* **277**, 27328-27336  
994 (2002).
- 995 52. Wilson, J.E. Hexokinases. *Rev Physiol Biochem Pharmacol* **126**, 65-198 (1995).
- 996 53. Gu, Y. *et al.* GlcNAcylation plays an essential role in breast cancer metastasis. *Cancer*  
997 *Res* **70**, 6344-6351 (2010).

- 998 54. Bhaskar, P.T. *et al.* mTORC1 hyperactivity inhibits serum deprivation-induced apoptosis  
999 via increased hexokinase II and GLUT1 expression, sustained Mcl-1 expression, and  
1000 glycogen synthase kinase 3beta inhibition. *Mol Cell Biol* **29**, 5136-5147 (2009).
- 1001 55. Majewski, N., Nogueira, V., Robey, R.B. & Hay, N. Akt inhibits apoptosis downstream  
1002 of BID cleavage via a glucose-dependent mechanism involving mitochondrial  
1003 hexokinases. *Mol Cell Biol* **24**, 730-740 (2004).
- 1004 56. Zhu, A., Romero, R. & Petty, H.R. An enzymatic fluorimetric assay for glucose-6-  
1005 phosphate: application in an in vitro Warburg-like effect. *Anal Biochem* **388**, 97-101  
1006 (2009).
- 1007 57. Young, L.E.A. *et al.* Accurate and sensitive quantitation of glucose and glucose  
1008 phosphates derived from storage carbohydrates by mass spectrometry. *Carbohydr Polym*  
1009 **230**, 115651 (2020).
- 1010 58. Kind, T. *et al.* FiehnLib: mass spectral and retention index libraries for metabolomics  
1011 based on quadrupole and time-of-flight gas chromatography/mass spectrometry. *Anal*  
1012 *Chem* **81**, 10038-10048 (2009).
- 1013 59. Fernandez, C.A., Des Rosiers, C., Previs, S.F., David, F. & Brunengraber, H. Correction  
1014 of <sup>13</sup>C mass isotopomer distributions for natural stable isotope abundance. *J Mass*  
1015 *Spectrom* **31**, 255-262 (1996).
- 1016 60. Chen, X. *et al.* Cell-Autonomous versus Systemic Akt Isoform Deletions Uncovered New  
1017 Roles for Akt1 and Akt2 in Breast Cancer. *Mol Cell* **80**, 87-101 e105 (2020).
- 1018 61. Butler, A., Hoffman, P., Smibert, P., Papalex, E. & Satija, R. Integrating single-cell  
1019 transcriptomic data across different conditions, technologies, and species. *Nat Biotechnol*  
1020 **36**, 411-420 (2018).
- 1021
- 1022
- 1023
- 1024
- 1025

1026

1027

**Figure Legends:**

1028

**Figure 1: Replacement of glucose with 2-DG inhibits the phosphorylation of GSK3 and increases GSK3 activity in a HK2-dependent manner.**

1029

1030

**a.** Rat1a cells or MEFs were incubated in glucose free medium in the absence (-) or presence of 10mM glucose (Glc), 2-DG or 5-TG. Immunoblots showing GSK3 $\beta$  phosphorylation, at the indicated time points after incubation.

1031

1032

1033

**b.** Schematic depicting the structures of glucose (Glc), 2-DG, and 5-TG and their utilization by HK inside cells. Similar to Glc, 2-DG can be phosphorylated by HK2 but cannot be further metabolized except in the first step of the pentose phosphate pathway (PPP). 5-TG cannot be phosphorylated by HK2

1034

1035

1036

1037

**c.** Cells were incubated in the presence of glucose (G), absence of glucose (-) or presence of 2-DG (D) for 2 hr. An immunoblot image shows the phosphorylation of GSK3 $\alpha$  and GSK3 $\beta$ .

1038

1039

**d.** Rat1a cells were incubated in glucose-free medium in the presence of 10 mM 2-DG for the indicated durations. Cells were then harvested for immunoblotting to determine GSK3 $\beta$  phosphorylation and MCL1 levels.

1040

1041

1042

**e.** M15-4 CHO cells expressing either wild-type (WT) HK2, individual kinase-dead HK2 mutants (DA, SA) or empty vector (V) were incubated in glucose-free medium in the presence of 10 mM glucose (G) or 2-DG (D). After 2 hr, cells were harvested and analyzed for immunoblotting.

1043

1044

1045

1046

**f.** The level of the Mcl-1 protein after expression of WT or kinase-dead SA mutant HK2 in M15-4 CHO cells.

1047

1048

**g.** Protein stability of MCL-1 in M15-4 CHO cells and M15-4 CHO cells expressing WT HK2 as measured after exposure to cycloheximide (CHX). Plot showing MCL1 protein half-life after quantification relative to b-actin in 3 independent experiments.

1049

1050

1051

1052



1053 **Figure 2: HK2 affects GSK3 $\beta$  phosphorylation in a PKA-dependent manner and interacts with**  
1054 **PRKAR1a and GSK3 $\beta$  in a 2-DG-dependent manner.**

1055 **a.** GSK3 $\beta$  phosphorylation following overexpression of HK2 in M15-4 cells in the presence of the  
1056 adenylate cyclase inhibitor 2'5'-dideoxyadenosine 200uM for 6 hr.

1057 **b.** GSK3 $\beta$  phosphorylation following overexpression of HK2 in M15-4 cells in the presence of the  
1058 PKA inhibitor H89. Cells were pretreated with either DMSO or H89 (10uM) for 2hr and then  
1059 exposed to 10mM glucose (Glc) or 2 DG for another 2hr in the presence of either DMSO or  
1060 H89. (left panel: representative immunoblot; right panel: quantification of pGSK3 $\beta$ /GSK3 $\beta$ .  
1061 Results are the mean  $\pm$  SEM of 3 independent experiments in duplicates).

1062 **c.** After transfection of control myc-tagged vector (V) or myc-tagged PRKAR1a (R1a) or control  
1063 myc-vector plasmid into HEK293 cells stably expressing HA-tagged HK2 (HEK293-HK2-HA), cells  
1064 were incubated in glucose-free medium in the presence of 10 mM glucose (Glc) or 2-DG. After 2  
1065 hr, cells were lysed for immunoprecipitation with anti-myc antibody, followed by  
1066 immunoblotting using anti-HA and anti-myc-HRP antibody. Total lysates were subjected to  
1067 immunoblotting using anti-HA antibody.

1068 **d.** Control or HK2-HA stably expressing cells were transfected with myc-GSK3 $\beta$ . Cells were then  
1069 incubated in glucose-free medium in the presence of 10 mM glucose (Glc) or 2-DG. After 2 hr,  
1070 cells were lysed for immunoprecipitation with anti-myc antibody, followed by immunoblotting  
1071 using anti-HA and anti-myc-HRP antibodies. Total lysates were subjected to immunoblotting  
1072 using anti-p-GSK3 $\beta$ , anti-myc-HRP, and anti-HA antibodies.

1073 **e.** After transfection of myc-GSK3 $\beta$  into HEK293-HK2-HA cells, cells were incubated in glucose-  
1074 free medium in the presence of 10 mM glucose (Glc) or 2-DG. After 2 hr, cells were lysed for  
1075 immunoprecipitation with anti-HA antibody, followed by immunoblotting using anti-myc-HRP  
1076 antibody and anti-PRKAR1a antibody. First lane shows control untransfected cells.

1077 **f.** HEK293 cells were incubated in glucose-free medium in the presence of 10 mM glucose (Glc)  
1078 or 2-DG. After 2hr, cells were lysed for immunoprecipitation. Endogenous HK2 was  
1079 immunoprecipitated with anti-HK2 and subjected to immunoblotting with anti-HK2 and anti-  
1080 GSK3 $\alpha$ / $\beta$ .

1081 g. The experiment was performed as described in D, except that after immunoprecipitation  
1082 with anti-myc, immunoblotting was performed with anti-PP2A.

1083

1084 **Figure 3. HK2 directly binds GSK3b and R1a in vitro to form complexes that are disrupted by**  
1085 **G6P.**

1086 a. Nickel-coated 96-well plates were incubated overnight at 4°C with His-PRKAR1a (50 nM) and  
1087 then incubated with Myc-HK2 (0.25– 64 nM) in blocking buffer or with blocking buffer without  
1088 HK2. HK2 binding was detected with anti-Myc-HRP conjugated antibody, and an HRP-catalyzed  
1089 reaction with a chromogenic substrate solution. Right panel: Nickel-coated plates were  
1090 incubated with His- PRKAR1a (50 nM) overnight and then with Myc-HK2 (32 nM) for 2h. Thirty  
1091 minutes before the end of the later incubation, increasing concentrations of G6P (0 – 100uM)  
1092 were added to the wells and detection was carried out as above.

1093 b. Glutathione-coated 96-well plates were incubated overnight at 4°C with GST-GSK3b (50 nM)  
1094 and then incubated with Myc-HK2 (0.25– 64 nM) in blocking buffer or with blocking buffer  
1095 without HK2. HK2 binding was detected as described above. Right panel: Glutathione -coated  
1096 plates were incubated with GST-GSK3b (50 nM) overnight and then with Myc-HK2 (32 nM) for  
1097 2h. Thirty minutes before the end of the later incubation, increasing concentrations of G6P (0 –  
1098 100uM) were added to the wells and detection was carried out as above.

1099 c. Nickel-coated 96-well plates were incubated overnight at 4°C with His-PRKAR1a (50 nM) or  
1100 with blocking buffer in absence of PRKAR1a, and then incubated with Myc-HK2 (32 nM) in  
1101 blocking buffer or with blocking buffer without HK2 for 2h. GST-GSK3b or blocking buffer  
1102 without GSK3b was then added for 2h. GSK3b binding was detected with anti-GST-HRP  
1103 conjugated antibody, and an HRP-catalyzed reaction with a chromogenic substrate solution.  
1104 Right panel: Nickel -coated plates were successively incubated with His-PRKAR1a (50 nM)  
1105 overnight, HK2-Myc (32nM) for 2h and then GST-GSK3b (32 nM) for 2h. Thirty minutes before  
1106 the end of the later incubation, increasing concentrations of G6P (0 – 1000uM) were added to  
1107 the wells and detection was carried out as above. Results are the mean  $\pm$  SEM of 3 independent  
1108 experiments.

1109 e. Nickel-coated plates were incubated overnight at 4°C with His-HK2 (50 nM) and then  
1110 successively incubated with Myc-PRKAR1 $\alpha$  (32nM), PKAc (20nM) and GST-GSK3 $\beta$  (32nM). For  
1111 the negative control experiments, His-HK2 or Myc-PRKAR1 $\alpha$  were omitted. Once all proteins are  
1112 bound, antibodies against HK2, PRKAR1 $\alpha$ , PKAc or GSK3 $\beta$  are added for overnight incubation  
1113 and detection is carried out after incubation with HRP-conjugated anti-rabbit or mouse IgG as  
1114 described in Methods.

1115 f. Nickel-coated plates were incubated overnight at 4°C with His-HK2 (50 nM) and then  
1116 successively incubated with Myc-PRKAR1 $\alpha$  (32nM), PKAc (20nM) and GST-GSK3 $\beta$  (32nM).  
1117 Kinase buffer in presence or absence of cAMP is added to appropriate wells and P-GSK3 $\beta$   
1118 antibody is added overnight, and then detected by incubation with HRP-conjugated anti-rabbit  
1119 IgG. Bound total GSK3 $\beta$  is detected with anti-GST-HRP conjugated antibody. Both detections  
1120 were revealed by HRP-catalyzed reaction with a chromogenic substrate solution. For G6P  
1121 inhibition, G6P was added 30 minutes before the end of the incubation with GST-GSK3 $\beta$ .

1122

1123 **Figure 4: Evidence that intracellular G6P accumulation inhibits GSK3 phosphorylation.**

1124 a. Schematic showing the effect of DHEA, 6-AN, and the knockdown of 6PGDH on the PPP and  
1125 glycolysis.

1126 b. Hela cells were treated with either DMSO, 6-AN or DHEA. At the indicated time points, cells  
1127 were harvested for immunoblotting using anti-p-GSK3 $\beta$  and anti-GSK3 $\alpha/\beta$ .

1128 c. Intracellular levels of G6P in control (DMSO treated), 200 $\mu$ M 6-AN treated, and 200 $\mu$ M DHEA  
1129 treated cells at different time points after treatment. Results are the mean  $\pm$  SEM of 3  
1130 independent experiments in triplicate. \*p<0.05

1131 d. Upper panel: Simplified schematic of steps in glycolysis and the pentose phosphate pathway  
1132 (PPP), showing  $^{13}\text{C}$  labelling patterns resulting from [1,2- $^{13}\text{C}_2$ ]-glucose substrate and the  
1133 conversion to M+1 and M+2 lactate. Red filled circles indicate  $^{13}\text{C}$  atoms. Abbreviations: G6P,  
1134 glucose-6-phosphate; 6PGL, 6-phosphogluconolactone; 6PG, 6-phosphogluconate; Ru5P,  
1135 ribulose-5-phosphate; F6P, fructose-6-phosphate; G3P, glyceraldehyde-3-phosphate; PEP,  
1136 phosphoenolpyruvate; PYR, pyruvate. Bottom panels: [1, 2- $^{13}\text{C}_2$ ]-glucose metabolic labelling in

1137 A549 cells showing the effect of 6-AN or the DOX-inducible knockdown of 6PDGH on the PPP  
1138 and glycolysis (cells were treated with either 6-AN for 16h or with DOX for 4 days). Results show  
1139 relative abundance of intracellular  $1x^{13}C$  lactate (M+1) and  $2x^{13}C$  lactate (M+2) after 25 mM [1,  
1140  $2^{-13}C_2$ ]-glucose labeling for 4 h. Results are the mean  $\pm$  SEM of 3 independent experiments.  
1141 \* $p < 0.05$ , \*\*\* $p < 0.01$ .

1142 e. A549 cells stably expressing each shRNA in the tet-on system were treated with doxycycline  
1143 (DOX, 0.2ug/ml) for six days, cells were harvested and analyzed by immunoblotting. A549 cells  
1144 expressing inducible 6PGD shRNA (Tet-6PGDsh) were also treated with 6-AN for 16h in the  
1145 absence of DOX.

1146 f. Cells were treated and isotopically labelled as in d, and 6PG level was measured after GPI and  
1147 6PGD knockdown or after treatment with 6-AN. Relative abundance of intracellular  $2x^{13}C$  G6P  
1148 (M+2) and  $2x^{13}C$  6PG (M+2) after 25 mM [1,  $2^{-13}C_2$ ]-glucose labeling for 4 h is shown. Results  
1149 are the mean  $\pm$  SEM of 3 independent experiments

1150 g. Cells were treated and isotopically labelled as in d, and G6P level was measured after GPI and  
1151 6PGD knockdown or after treatment with 6-AN.

1152 h. A549 cells expressing inducible 6PGD sh RNA (Tet-6PGDsh) were exposed to DOX and pGSK3  
1153 and NRF2 levels were followed for 4 days after DOX addition (Numbers indicate level relative to  
1154 tubulin).

1155

1156 **Figure 5: Systemic and cell autonomous deletion of HK2 inhibits metastasis to the lung in**  
1157 **MMTV-PyMT mice.**

1158 a. Schematic illustration depicting the experimental approach for systemic deletion of HK2  
1159 in *MMTV-PyMT* mouse model. Once a primary tumor was palpable, tamoxifen (TAM) was  
1160 injected for 7 consecutive days in *MMTV-PyMT; HK2<sup>ff</sup>; UBC-Cre<sup>ERT2</sup>* and *MMTV-PyMT; HK2<sup>ff</sup>*  
1161 mice. At endpoint mice were euthanized and lung metastasis was quantified.

1162 b. Tumor end point analysis in *MMTV-PyMT; HK2<sup>ff</sup>; UBC-Cre<sup>ERT2</sup>* and *MMTV-PyMT; HK2<sup>ff</sup>*  
1163 mice with TAM injection at tumor onset. Results are the mean  $\pm$  SEM. ( $p < 0.0001$ ).

1164 c. Incidence of metastatic lesions in the lungs. When tumors reached end-point, the mice  
1165 were euthanized, and metastatic lesions in the lungs were quantified. Results are the mean  
1166  $\pm$  SEM. \* $p < 0.001$ .

1167 d. Cell-autonomous deletion of HK2 impairs lung metastasis. Isolated *MMTV-PyMT;HK2<sup>ff</sup>*  
1168 mammary tumor cells were treated with GFP-Cre adenovirus to delete HK2 or GFP  
1169 adenovirus as a control. After 72 hr, the cells were transplanted into the mammary fat pads  
1170 of recipient immunodeficient NOG mice. At the end point, mice were euthanized, and lung  
1171 metastatic lesions were quantified. The results are the mean  $\pm$  SEM, \* $p = 0.0013$ .

1172 e. Left: Schematic showing experimental design: *MMTV-*  
1173 *PyMT;HK2<sup>ff</sup>;LSL.Luc;MMTV.rtTATet(O)Cre* and control *MMTV-*  
1174 *PyMT;LSL.Luc;MMTV.rtTATet(O)Cre* mice were subjected to DOX diet after tumor onset and  
1175 metastasis was quantified at end point. Right: Quantification of metastasis to the lung. The  
1176 results are the mean  $\pm$  SEM. \*\* $p=0.0038$ .

1177

1178 **Figure 6: The effect of HK2 deletion on specific SNAIL target gene expression in epithelial and**  
1179 **mesenchymal cell clusters and SNAIL protein levels in the primary tumors.**

1180 a. Single cell RNA sequencing and clustering of primary tumor cells derived from tumors at end-  
1181 point of *MMTV-PyMT;HK2<sup>ff</sup>* (n=7) and *MMTV-PyMT;HK2<sup>ff</sup>;UBC-Cre<sup>ERT2</sup>* (n=8) mice after TAM  
1182 exposure. t-Distributed Stochastic Neighbor Embedding (tSNE) is shown. The color-coded  
1183 clusters are grouped together by similar gene expression. Twenty-five clusters including nine  
1184 primary tumor PyMT-expressing clusters were identified.

1185 b. Dot plot showing the expression of SNAIL targets important for EMT and metastasis (Vim,  
1186 Mmp2, Sparc, Tfgbr2, Tagln) in Cluster 15 from WT and KO (*MMTV-PyMT;HK2<sup>ff</sup>* and *MMTV-*  
1187 *PyMT;HK2<sup>ff</sup>;UBC-Cre<sup>ERT2</sup>*) tumors after TAM exposure at tumor onset). High RNA expression is  
1188 indicated by a dark red color.

1189 c. Dot plot showing the expression epithelial markers such as E-cadherin (Cdh1), Claudin-1  
1190 (Cldn1), and Desmoplakin (DSP) in Cluster 14 from WT and KO (*MMTV-PyMT;HK2<sup>ff</sup>* and *MMTV-*  
1191 *PyMT;HK2<sup>ff</sup>;UBC-Cre<sup>ERT2</sup>*) tumors after TAM exposure at tumor onset. A high RNA expression is  
1192 indicated by a dark red color.

1193 **d.** Immunoblot image of HK2 and SNAIL protein levels in tissue samples collected from normal  
1194 mammary glands and primary mammary gland tumors.

1195 **e.** Upper: Immunoblot image of HK2 and SNAIL protein levels in tissue samples collected from  
1196 primary mammary gland tumors at end-point after exposure to TAM at tumor onset, in *MMTV-*  
1197 *PyMT;HK2<sup>ff</sup>* and *MMTV-PyMT;HK2<sup>ff</sup>;UBC-Cre<sup>ERT2</sup>* mice. Bottom: Quantification of HK2 and  
1198 SNAIL protein levels, *MMTV-PyMT;HK2<sup>ff</sup>* (n=7), *MMTV-PyMT;HK2<sup>ff</sup>;UBC-Cre<sup>ERT2</sup>* (n=10). Results  
1199 are the mean  $\pm$  SEM. \* $p \leq 0.05$ .

1200 **f.** Immunoblot image of HK2, pGSK3b, GSK3b, E-cadherin, and SNAIL protein levels in primary  
1201 mammary tumors at end-point derived from *MMTV-PyMT;LSL.Luc;MMTV.rtTATet(O)Cre* control  
1202 mice (n=3) or *MMTV-PyMT;HK2<sup>ff</sup>;LSL.Luc;MMTV.rtTATet(O)Cre* mice (n=3) subjected to DOX  
1203 diet after tumor onset.

1204 **g.** Representative immunoblot image of HK2, E-cadherin, vimentin, and SNAIL protein levels in  
1205 protein extracts from cells isolated from tumors in *MMTV-PyMT;HK2<sup>ff</sup>* mice after infection with  
1206 adenovirus expressing either GFP or GFP-Cre (n $\geq$ 3).

1207

1208 **Figure 7. HK2 silencing in 4T1 cells inhibits metastasis to the lung and impairs EMT gene**  
1209 **expression, and SNAIL protein stability and nuclear localization in a GSK3-dependent manner.**

1210 **a.** Immunoblot image showing HK2 levels in two isogenic breast cancer cell lines: 67NR (a  
1211 non-metastatic line) and 4T1 (a highly metastatic line).

1212 **b.** Left: Representative images showing H&E staining of lung sections after orthotopic  
1213 transplantation of 4T1 or 4T1shHK2 cells into Balb/cj mice. Right: Quantification of lung  
1214 metastatic lesions (4T1 transplantation, n=10; 4T1 shHK2 transplantation, n=9) at end point.  
1215 Results are the mean  $\pm$  SEM. \* $p < 0.001$

1216 **c.** A representative immunoblot image showing the effect of HK2 silencing in 4T1 cells and  
1217 overexpression of HK2 in 67NR cells on SNAIL, E-cadherin, and vimentin protein levels and  
1218 GSK3 $\beta$  phosphorylation (n=3).

1219 **d.** Quantification of protein levels after HK2 silencing in 4T1 cells. Results are the mean  $\pm$  SEM  
1220 of 3 independent experiments. \* $p < 0.05$ .

- 1221 e. Quantitative RT-PCR analysis measuring relative mRNA levels in 4T1 and 4T1shHK2 cells.  
1222 Results are the mean  $\pm$  SEM (n=5). \*p< 0.03.
- 1223 f. Protein stability of SNAIL in 4T1 and 4T1shHK2 cells as measured after exposure to  
1224 cycloheximide (CHX). Upper: Representative immunoblot image. Bottom: Plot showing SNAIL  
1225 protein half-life after quantification relative to b-actin in 3 independent experiments. The  
1226 half-life results are the mean  $\pm$  SEM. p<0.01
- 1227 g. Protein stability of transiently expressed GFP tagged SNAIL in 4T1 and 4T1shHK2 cells as  
1228 measured after exposure to cycloheximide (CHX). Upper: Representative immunoblot image.  
1229 Bottom: Plot showing GFP-SNAIL protein half-life after quantification relative to b-actin in 3  
1230 independent experiments. The half-life results are the mean  $\pm$  SEM. p<0.05
- 1231 h. Immunoblot image showing the level of transiently expressed GFP-tagged 6SA-SNAIL  
1232 mutant in 4T1shHK2 after exposure to cycloheximide over a 5-hr time course.
- 1233 i. GFP-SNAIL and GFP-6SA-SNAIL were transiently expressed in 4T1 and 4T1shHK2 cells.  
1234 After fixation of the cells, the localization of SNAIL (green) and nuclei (blue; Hoechst  
1235 33342)  
1236 was examined under a fluorescence microscope and quantified (bottom). The bar graph  
1237 represents the relative GFP-SNAIL localization in the cytoplasm versus in the nucleus in 4T1  
1238 and 4T1shHK2 cells. Results are the mean  $\pm$  SEM, n=3. \*p< 0.05.
- 1239 j. Transient expression of 6SA SNAIL in 4T1shHK2 cells restores metastasis to the lung.  
1240 4T1shHK2 cells expressing DOX-inducible empty vector (EV) and 4T1shHK2 cells expressing  
1241 DOX-inducible 6SA SNAIL were orthotopically implanted in Balb/cj mice (4T1shHK2 EV, n=4 and  
1242 4T1shHK2 10 6SA SNAIL n=5) , and exposed to DOX for one week. At end point lung metastatic  
1243 lesions were quantified. The results are the mean  $\pm$  SEM. \*p<0.05

1244

1245 **Figure 8. HK2 deficiency inhibits the incorporation of metabolically labeled glucose into**  
1246 **UDP-N-acetylglucosamine and reduces total and SNAIL O-GlcNAc modification.**

1247

- 1248 a. Left: Immunoblot images showing total O-GlcNAc protein modification in MMTV-PyMT  
1249 mammary gland tumors after systemic deletion of HK2 (n=4). Right: Quantification of total

1250 O-GlcNAc modifications in control primary tumors and primary tumors after systemic HK2  
1251 deletion (n=9). Results are the mean  $\pm$  SEM. \*p< 0.05.

1252 **b.** Immunoblot images of total O-GlcNAc protein modification in 4T1 cells after HK2  
1253 silencing and 67NR cells after HK2 overexpression.

1254 **c.** Tracing of UDP-GlcNAc isotopomers after culturing 4T1 and 4T1shHK2 cells with 5mM of  
1255 U<sup>13</sup>C<sub>6</sub>-glucose for 5min. Tracing was performed by ion chromatography (IC-MS). Data  
1256 shown as fold changes relative to the control 4T1shNT cells for each isotopomer for UDP-  
1257 GlcNAc with natural abundance correction and represented as means SEMs \*p < 0.05 from  
1258 triplicate experiments using an unpaired t-test (n=3). The schematic shows the  
1259 contribution U<sup>13</sup>C<sub>6</sub>-glucose-6-P to the UDP-GlcNAc isotopomers.

1260 **d.** Immunoprecipitation with anti-O-GlcNAc and immunoblotting with anti-SNAIL after  
1261 transient transfection of 4T1 and 4T1shHK2 cells with GFP-SNAIL.

1262 **e.** Schematic depicting how HK2 affects SNAIL protein stability and activity.

1263



1264 **Extended Data Figure Legends**

1265

1266

**Extended Data Figure 1:**

1267

**a.** Hexokinase activity in M15-4 CHO cells expressing empty vector (EV), WT HK2 or HK2 mutants. Results are the mean  $\pm$  SEM of 3 independent experiments in triplicate. \* $p < 0.05$ , all 2-sided t-test vs. EV.

1268

1269

1270

**b.** M15-4 CHO cells expressing either wild type (WT), kinase-dead HK2 mutant (DA), mitochondrial binding deficient mutant (dMT) or empty vector (V) were incubated in glucose free medium in the presence of 10mM glucose (G) or 2-DG (D). After 2hr, cells were harvested and analyzed by immunoblotting.

1271

1272

1273

1274

1275

**Extended Data Figure 2:**

1276

**Hexokinase maintains GSK3 $\beta$  phosphorylation independent of its activity, but its activity is required to suppress GSK3 $\beta$  phosphorylation by 2-DG.**

1277

1278

**a.** The effect of WT HK2 and HK2 mutants overexpression on GSK3 $\beta$  phosphorylation in Rat1a cells.

1279

1280

**b.** The effect of 2-DG on GSK3 $\beta$  phosphorylation mediated by either WT HK2 or HK2 mutants in HEK293 cells.

1281

1282

1283

**Extended Data Figure 3:**

1284

**The effect of HK2 on GSK3 $\beta$  phosphorylation is independent of Akt activity.**

1285

**a.** WT MEFs were incubated in glucose free medium in the presence of 10mM glucose (G) or 2-DG (D) followed by immunoblotting to determine GSK3 $\beta$  and Akt phosphorylation.

1286

1287

**b.** Akt1/2 DKO MEFs treated with LY294002 (LY) were incubated in glucose free medium in the presence of 10mM glucose (G) or 2-DG (D) followed by immunoblotting to determine GSK3 $\beta$  and Akt phosphorylation.

1288

1289

1290

**c.** MEFs expressing mAkt or vector control (Vec) were deprived of FBS and incubated in glucose free medium in the presence of 10mM glucose (G) or 2-DG (D) followed by immunoblotting to determine GSK3 $\beta$  and Akt phosphorylation.

1291

1292

1293

1294

**Extended Data Figure 4:**

1295

**Yeast two-hybrid screen for HK2 interacting proteins** (Performed by Invitrogen life technologies, Japan). Full length HK2 was cloned into the pDEST32 vector as a plasmid bait. Empty pDEST32 or pDEST32 expressing HK2 were transformed into MaV203 yeast competent cells. Large scale screening was performed under 10 mM 3AT concentration. After 4 days incubation, comparatively large 90 colonies were selected and cultured in 100 ul of SD-LTH medium with 10mM 3AT for one day using a 96-well plate, and then spotted on SD-LT plate, SD-LTH 10 mM 3AT plate, and nylon membrane on YPD plate for beta-gal assay. Prey plasmids, purified from possible positive clone, were introduced into E.coli and were estimated fragment size by colony PCR. Plasmids then were purified from the E. coli and transformed along with the bait or empty plasmid back into yeast and tested for all four phenotypes (sensitivity to 3AT, growth on medium without uracil, sensitivity to 5-FOA and detection of  $\beta$ -galactosidase activity). The insert of potential interactor was sequenced and then BLAST search was performed.

1296

1297

1298

1299

1300

1301

1302

1303

1304

1305

1306

1307

- 1308 a. Position of spotting clones.  
1309 b. Possible positive clones (grown on 10mM 3AT plates); A1, A5, and E2 (F9,F12, and H6 were  
1310 false positive.  
1311 c. Inserts in A1, A5 and E2 were amplified by PCR and cloned into plasmids. Insert size after  
1312 cloning is shown.  
1313 d. Plasmids were re-validated for interaction with the HK2 bait and one plasmid E2-2 was  
1314 found as a real interactor.  
1315 e. The insert sequence of E2-2. Red labeled amino acids.

1316  
1317  
1318 **Extended Data Figure 5:**

1319 **HK2 interacts with GSK3 $\beta$  in a 2DG-dependent manner.**

1320 a. After co-transfection of HK2-HA or HA-vector with Myc-GSK3 $\beta$  wild type (WT) or Myc-GSK3 $\beta$   
1321 nonphosphorylatable mutant (S9A) into HEK293 cells, the cells were incubated in glucose free  
1322 medium in the presence of 10mM glucose (Glc) or 2-DG. After 2hr, cells were lysed for  
1323 immunoprecipitation with anti-HA antibody followed by immunoblotting using anti-Myc-HRP,  
1324 anti-HA and anti-P-GSK3 $\beta$  antibodies. Total lysates were subjected to immunoblotting using  
1325 anti-P-GSK3 $\beta$ , and anti-Myc-HRP antibodies.

1326 b. After transfection of control Myc-vector or Myc-GSK3 $\beta$  plasmid into HEK293-HK2-HA  
1327 expressing cells, the cells were incubated in glucose free medium in the presence of 10mM  
1328 glucose (Glc) or 2-DG. After 2hr, cells were lysed for immunoprecipitation with anti-Myc  
1329 antibody followed by immunoblotting using anti-HA and anti-Myc-HRP, antibodies. Total lysates  
1330 were subjected to immunoblotting using anti-P-GSK3 $\beta$ , anti-Myc-HRP, and anti-HA antibodies.

1331 c. After transfection of Myc-GSK3 $\beta$  into M15-4 CHO cells expressing either WT or mutants HK2,  
1332 cells were incubated in glucose free medium in the presence of 10mM glucose (Glc) or 2-DG.  
1333 After 2hr, cells were lysed for immunoprecipitation with anti-HA antibody followed by  
1334 immunoblotting using anti-Myc-HRP and anti-HA and antibodies. Total lysates were subjected  
1335 to immunoblotting using anti-Myc-HRP and anti-HA antibodies.

1336  
1337 **Extended Data Figure 6:**

1338 **The effect of protein phosphatases on GSK3 $\beta$  phosphorylation.**

1339 a. HeLa cells were incubated in glucose free medium in the presence of 10mM glucose (G) or 2-  
1340 DG (D). DMSO (C), OA (20nM, 100nM), or TC (100nM, 500nM) were also treated with glucose or  
1341 2DG. After 2hr, cells were harvested and analyzed for immunoblotting using anti-P-GSK3 $\beta$  and  
1342 anti-GSK3 $\alpha/\beta$  (S-short exposure, M-medium exposure, L-long exposure).

1343 b. Experiment was done as in a except that cells were treated with LB100 quantification of  
1344 pGSK3b/GSK3a/b ratio is shown. Results are the mean  $\pm$  SEM of 3 independent experiments in  
1345 duplicates.

1346  
1347 **Extended Data Figure 7:**

1348 **The effect of FMP-API-1 on HK2-PRKAR1a binding.**

1349 Nickel-coated 96-well plates were incubated overnight at 4°C with His-PRKAR1 $\alpha$  (50 nM) and  
1350 then incubated with Myc-HK2 (32 nM) for 2h. Thirty minutes before the end of the later  
1351 incubation, increasing concentrations of FMP-API-1 (0 – 1000uM) are added to the wells. HK2

1352 binding was detected with anti-Myc-HRP conjugated antibody, and an HRP-catalyzed reaction  
1353 with a chromogenic substrate solution.

1354  
1355  
1356 **Extended Data Figure 8:**

1357 **Extracellular lactate production rates in A549 cells.**

1358 The amount of extracellular lactate production in 24 h was normalized to viable cell number;  
1359 cells were treated with or without 0.2ug/ml DOX for 6 days.

1360 Results are the mean  $\pm$  SEM of 3 independent experiments. \*\*P<0.005, \*\*\*P<0.0005

1361  
1362  
1363  
1364  
1365 **Extended Data Figure 9:**

1366 Representative immunoblot image showing P-GSK3 $\beta$ , Mcl-1 and NRF2 levels after the  
1367 knockdown of HK2 in A549 cells.

1368  
1369  
1370 **Extended Data Figure 10:**

1371 **A model depicting HK2 as a scaffold for GSK3 and PRKAR1a-PKA.** When cells have high  
1372 glucose flux, HK2 brings PKA and GSK3 into close proximity. In the presence of cAMP, PKA is  
1373 released from PRKAR1a to phosphorylate GSK3. When glucose flux is attenuated and G6P  
1374 accumulates, an allosteric change is conferred to HK2 releasing GSK3 and PRKAR1a and  
1375 increasing the availability of phosphorylated GSK3 to PP2A. It is possible that the amino-  
1376 terminus half and the carboxy-terminus half of HK2 each binds GSK3 and PRKAR1a.

1377  
1378  
1379 **Extended Data Figure 11:**

1380 **tSNE plot of pooled wild-type and HK2 deletion primary tumor samples.** t-Distributed  
1381 Stochastic Neighbor Embedding (tSNE) plot of pooled *MMTV-PyMT; HK2<sup>ff</sup>* and *MMTV-PyMT;*  
1382 *HK2<sup>ff</sup>; UBC-Cre<sup>ERT2</sup>* primary mammary gland tumor samples (n=7 and n=8 respectively). There  
1383 was no significant difference in the percentage of cells grouped into the clusters between HK2-  
1384 deleted primary tumors (KO, red) and control primary tumors (WT, blue). Primary PyMT  
1385 positive tumor cells are circled.

1386  
1387  
1388 **Extended Data Figure 12:**

1389 **HK2 silencing in 4T1 cells decreases transwell migration and invasion, while overexpression of**  
1390 **HK2 in 67NR cells increases transwell migration.**

1391 **a.** Immunoblot showing HK2 levels in 4T1 cells before and after silencing of HK2 and HK2 levels  
1392 67NR cells before and after overexpression of HK2.

1393 **b.** Transwell migration comparing 4T1 shHK2 and 67NR WTHK2 cells to their parental cell lines.  
1394 For transwell migration analysis, the cells were incubated in the upper transwell chambers for  
1395 12 hr with no serum while 20% serum was added to the lower chambers as a stimulant.

1396 Migrated cells in five random fields were counted after crystal violet staining, and three  
1397 independent experiments were statistically analyzed. Quantified data represented as the mean  
1398  $\pm$  SEM, \* $p < 0.002$  from three independent experiments with each group plated in triplicate.

1399 **c.** Transwell migration analysis comparing 67NR cells to cells expression Wt HK2 or HK2DA  
1400 mutant.

1401 **d.** Transwell invasion of 4T1shHK2 compared to their parental cell line. Briefly, the cells were  
1402 incubated in a gel-coated transwell chambers for 24 hr with no serum, and 20% serum was  
1403 added to the lower chambers as a stimulant. The same numbers of cells were plated on control  
1404 transwell chambers for migration. The percent areas of invaded and migrated cells stained with  
1405 crystal violet in ten random fields were counted, and the percentage of invaded cells was  
1406 calculated. Three independent experiments were performed. The data represent the mean  $\pm$   
1407 SEM, \* $p < 0.05$ .

1408  
1409  
1410 **Extended Data Figure 13:**

1411 **The effect 2-DG and 6AN treatment on SNAIL protein levels, GSK3 phosphorylation, and HK2-**  
1412 **GSK3 binding .**

1413 **a.** 4T1 cells were treated with 10 mM 2-DG or glucose as a control for 2 hr and then subjected  
1414 to immunoblotting. Data were normalized to the amount of total GSK3 $\beta$ , and fold changes  
1415 shown are relative to the control glucose-treated 4T1 cells. Quantified western blot data from  
1416 2-DG treatment are represented as the means  $\pm$  SEMs. \* $p < 0.005$  from triplicate experiments  
1417 using an unpaired t-test (n=4).

1418 **b.** 4T1 cells were treated with 1 mM 6-AN for 12 hr and then subjected to immunoblotting to  
1419 determine SNAIL and P-GSK3 $\beta$  levels. Quantified western blot data after 6-AN treatment are  
1420 represented as the means  $\pm$  SEMs.  $p < 0.03$  from triplicate experiments using an unpaired t-test  
1421 (n=4). Data were normalized to the amount of total GSK3 $\beta$ , and the fold changes shown are  
1422 relative to the control DMSO-treated 4T1 cells.

1423 **c.** 4T1 cells were incubated in glucose free medium in the presence of 10mM glucose (Glc) or 2-  
1424 DG. After 2hr, cells were lysed for immunoprecipitation. Endogenous HK2 was  
1425 immunoprecipitated with anti-HK2 and subjected to immunoblotting with anti-HK2 and anti-  
1426 GSK3 $\beta$  antibodies.

1427  
1428  
1429  
1430  
1431  
1432

1433

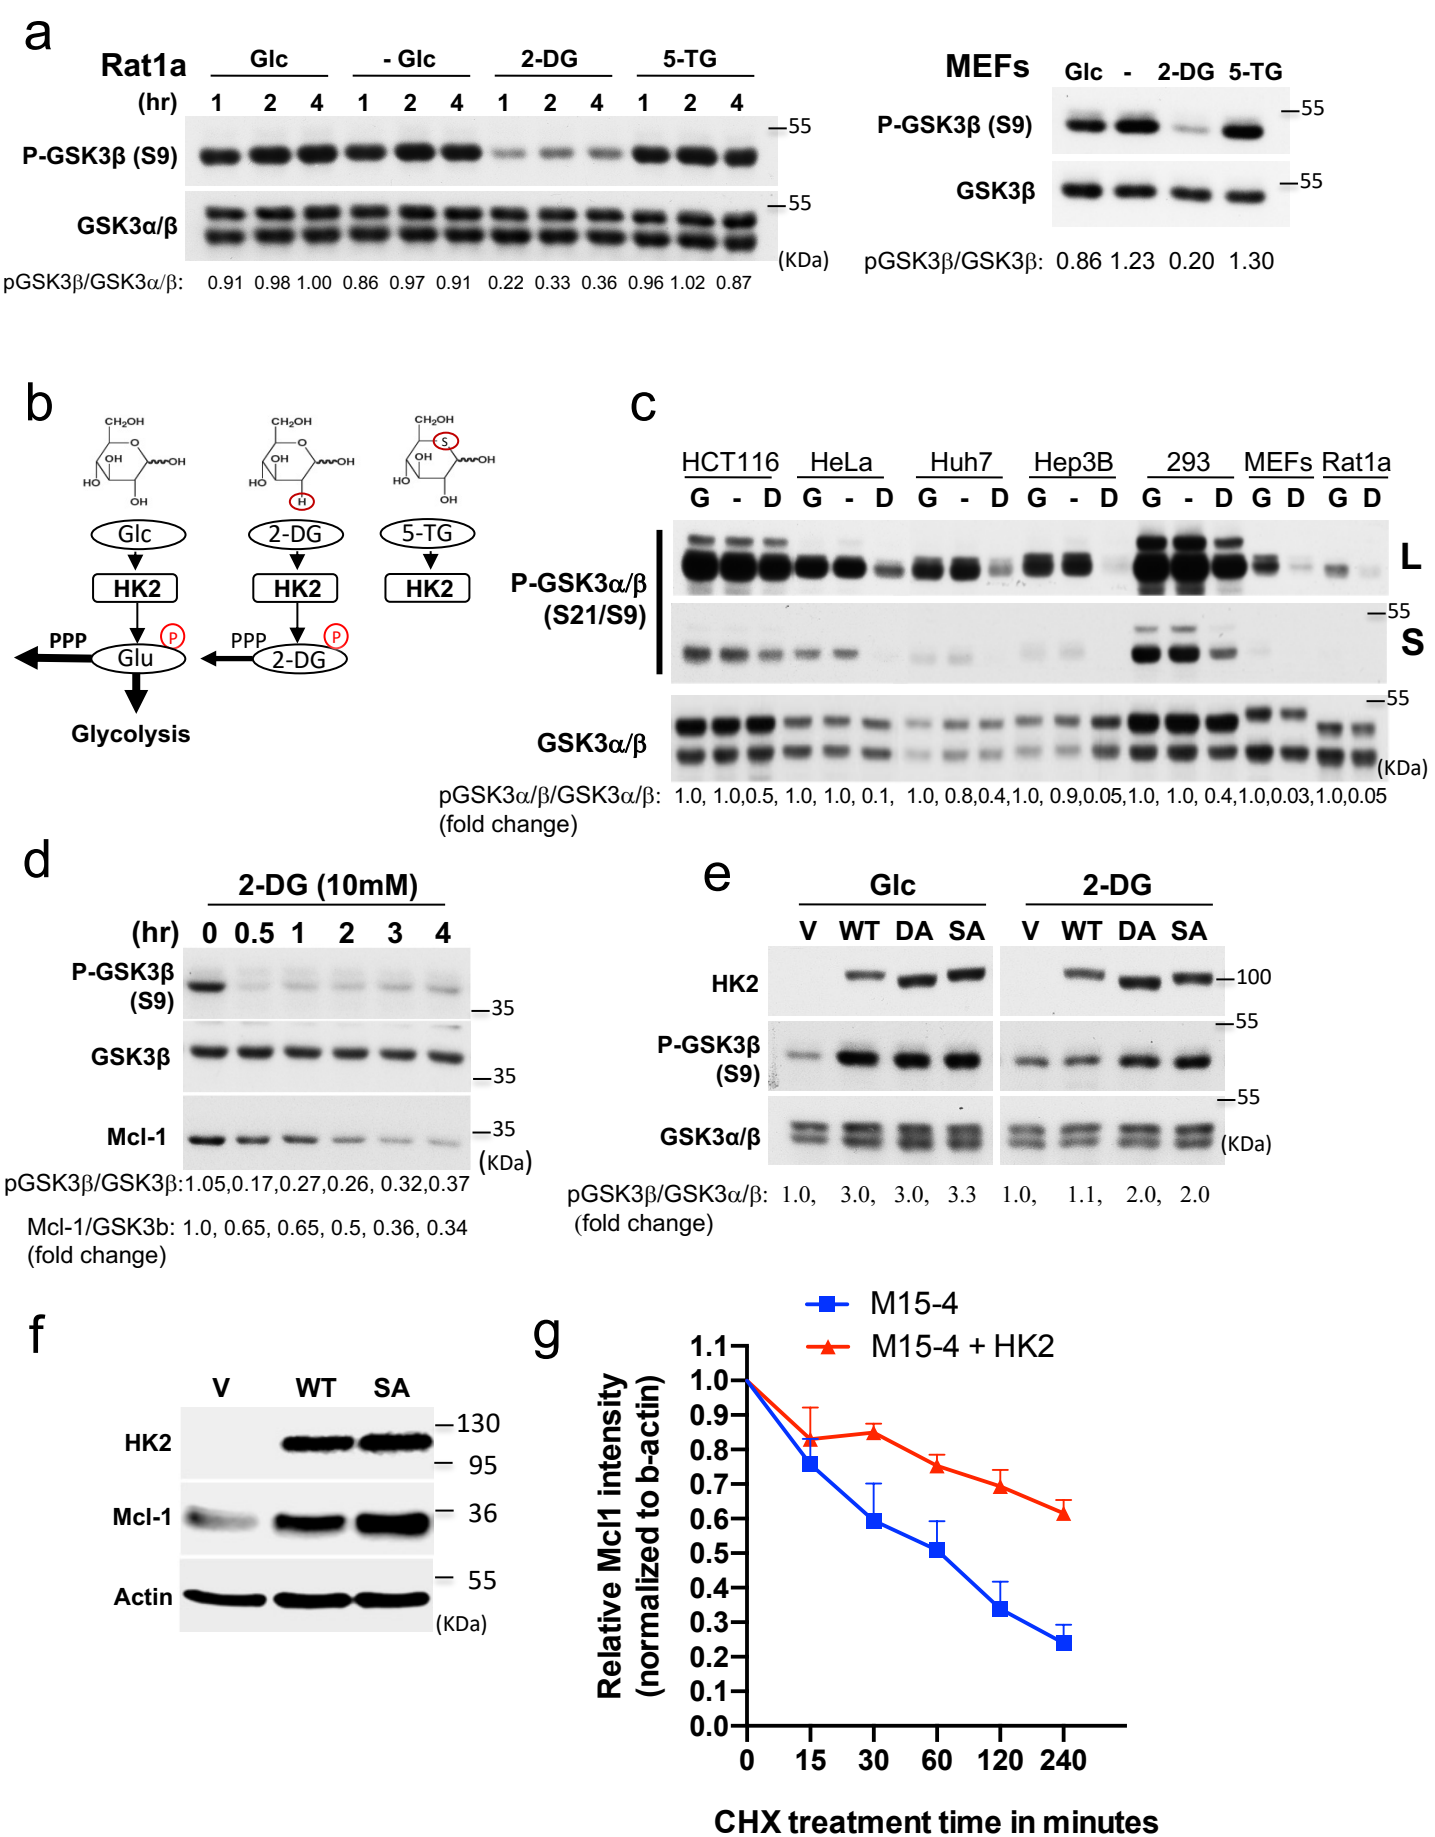

Figure 1

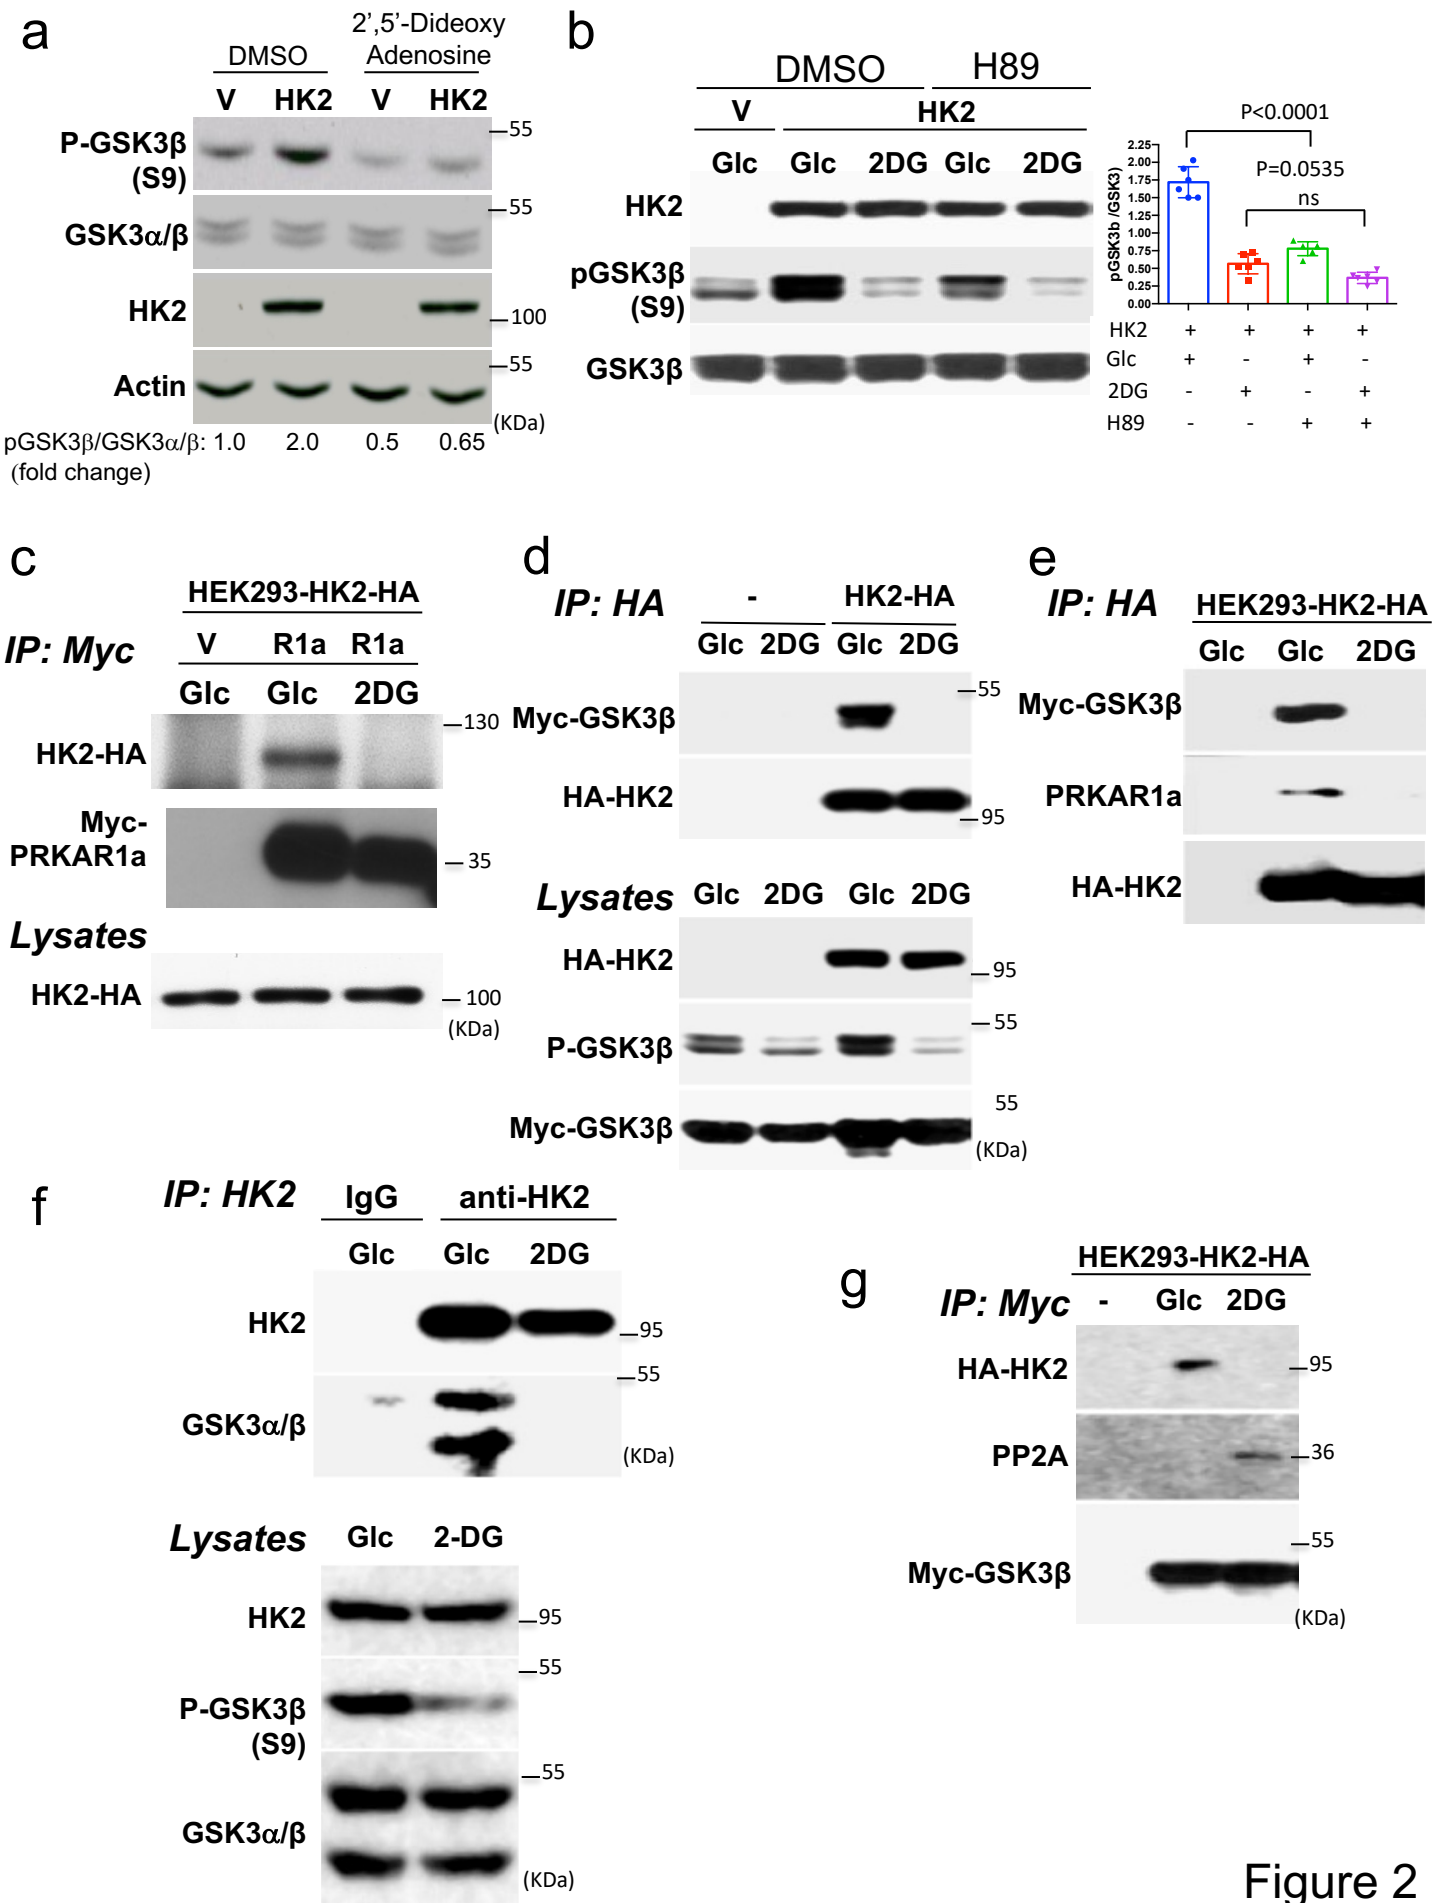

Figure 2

**a**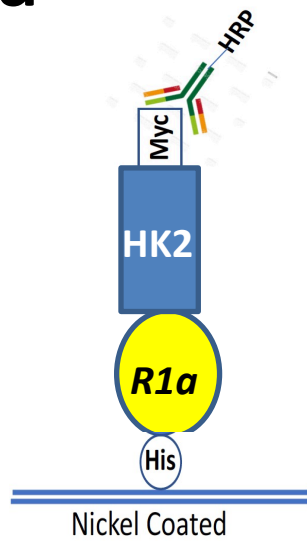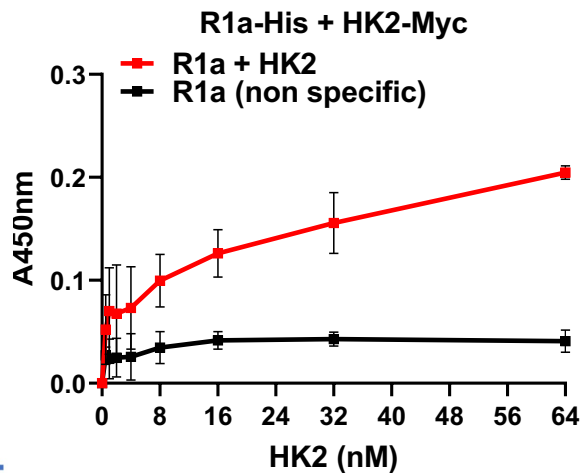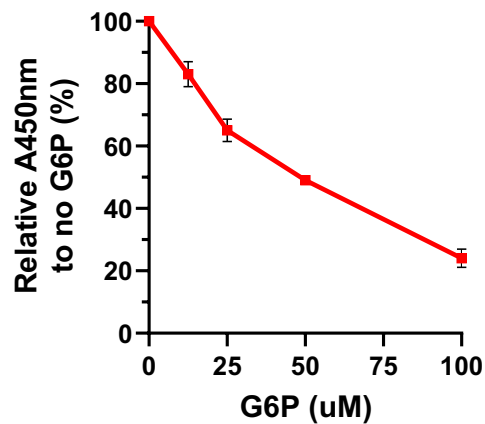**b**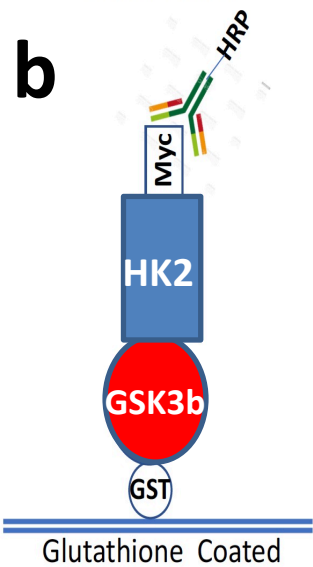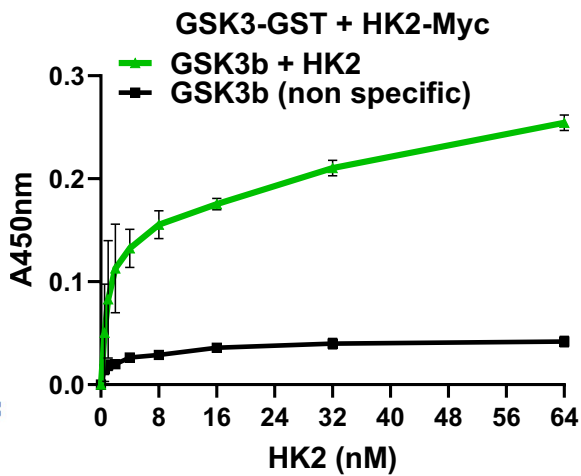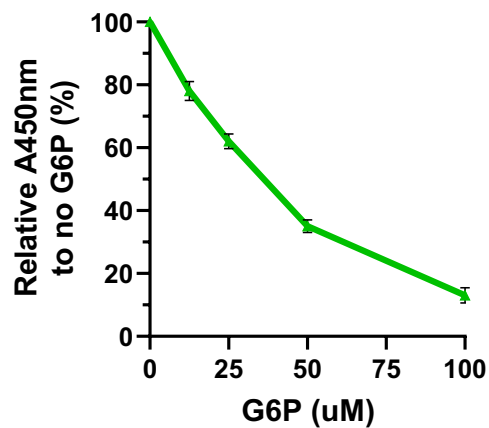**c**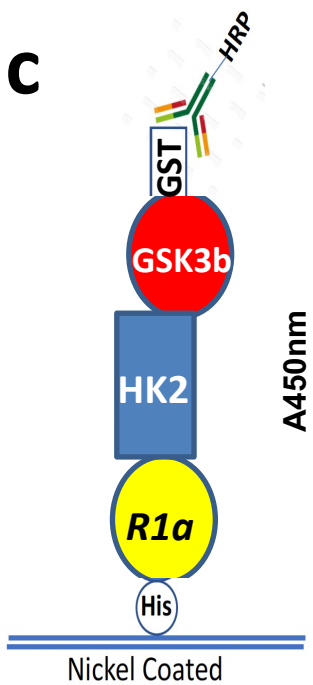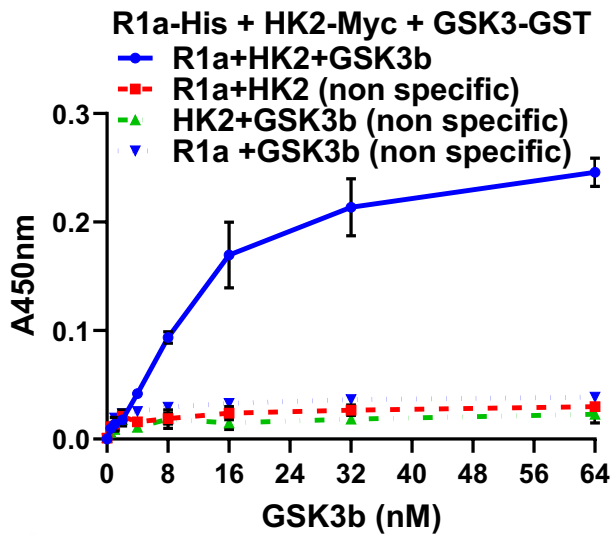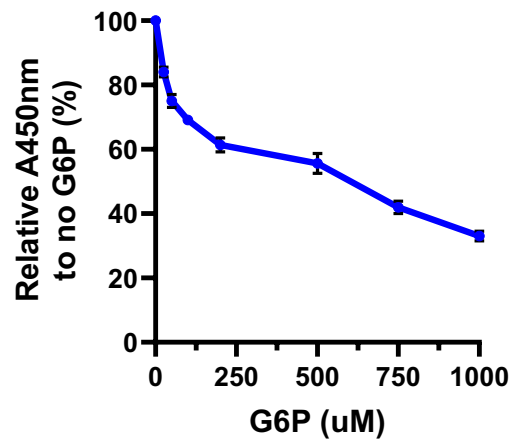

Figure 3

**d**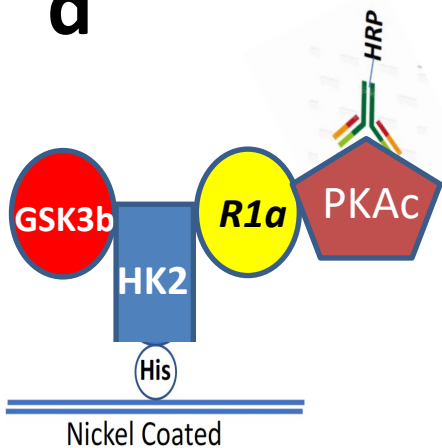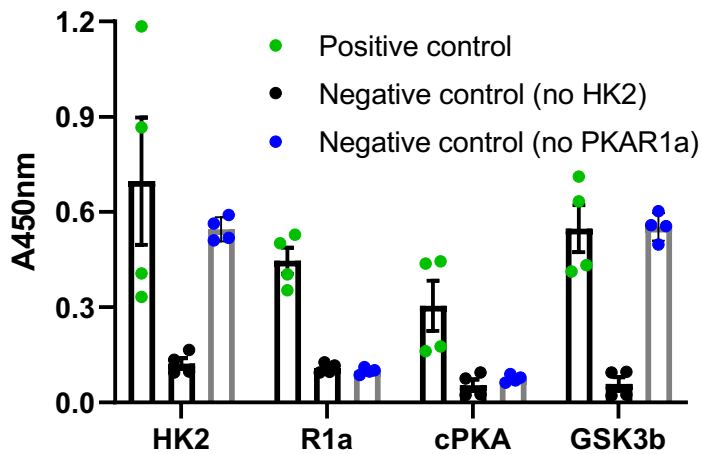**e**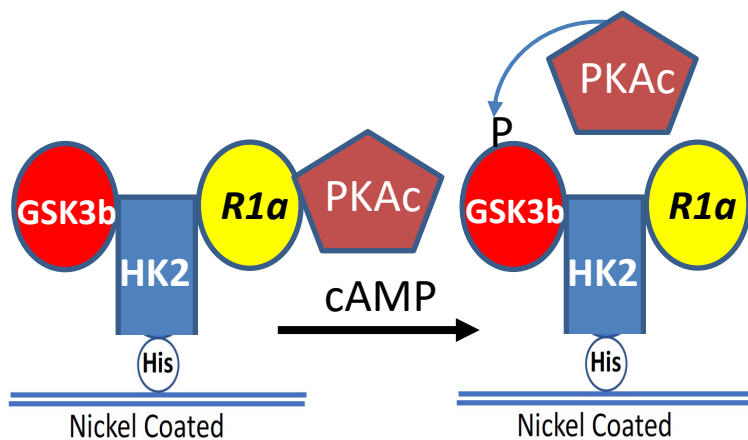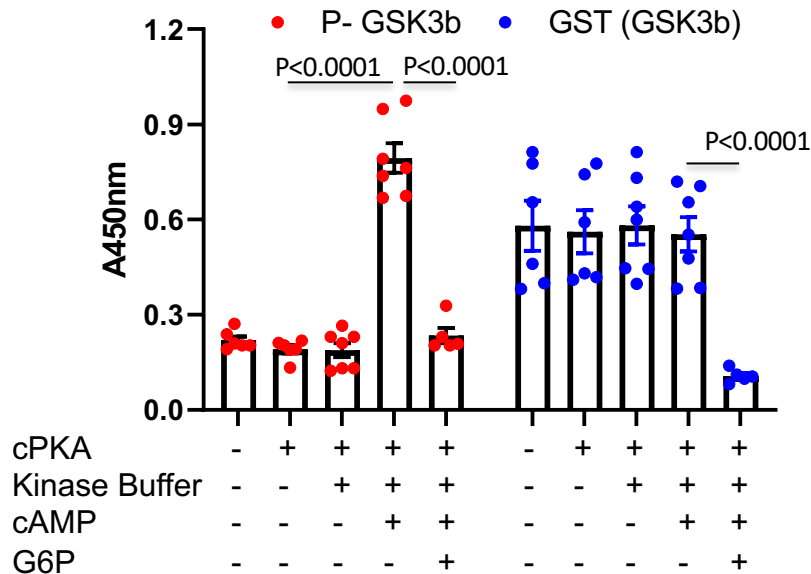

Figure 3



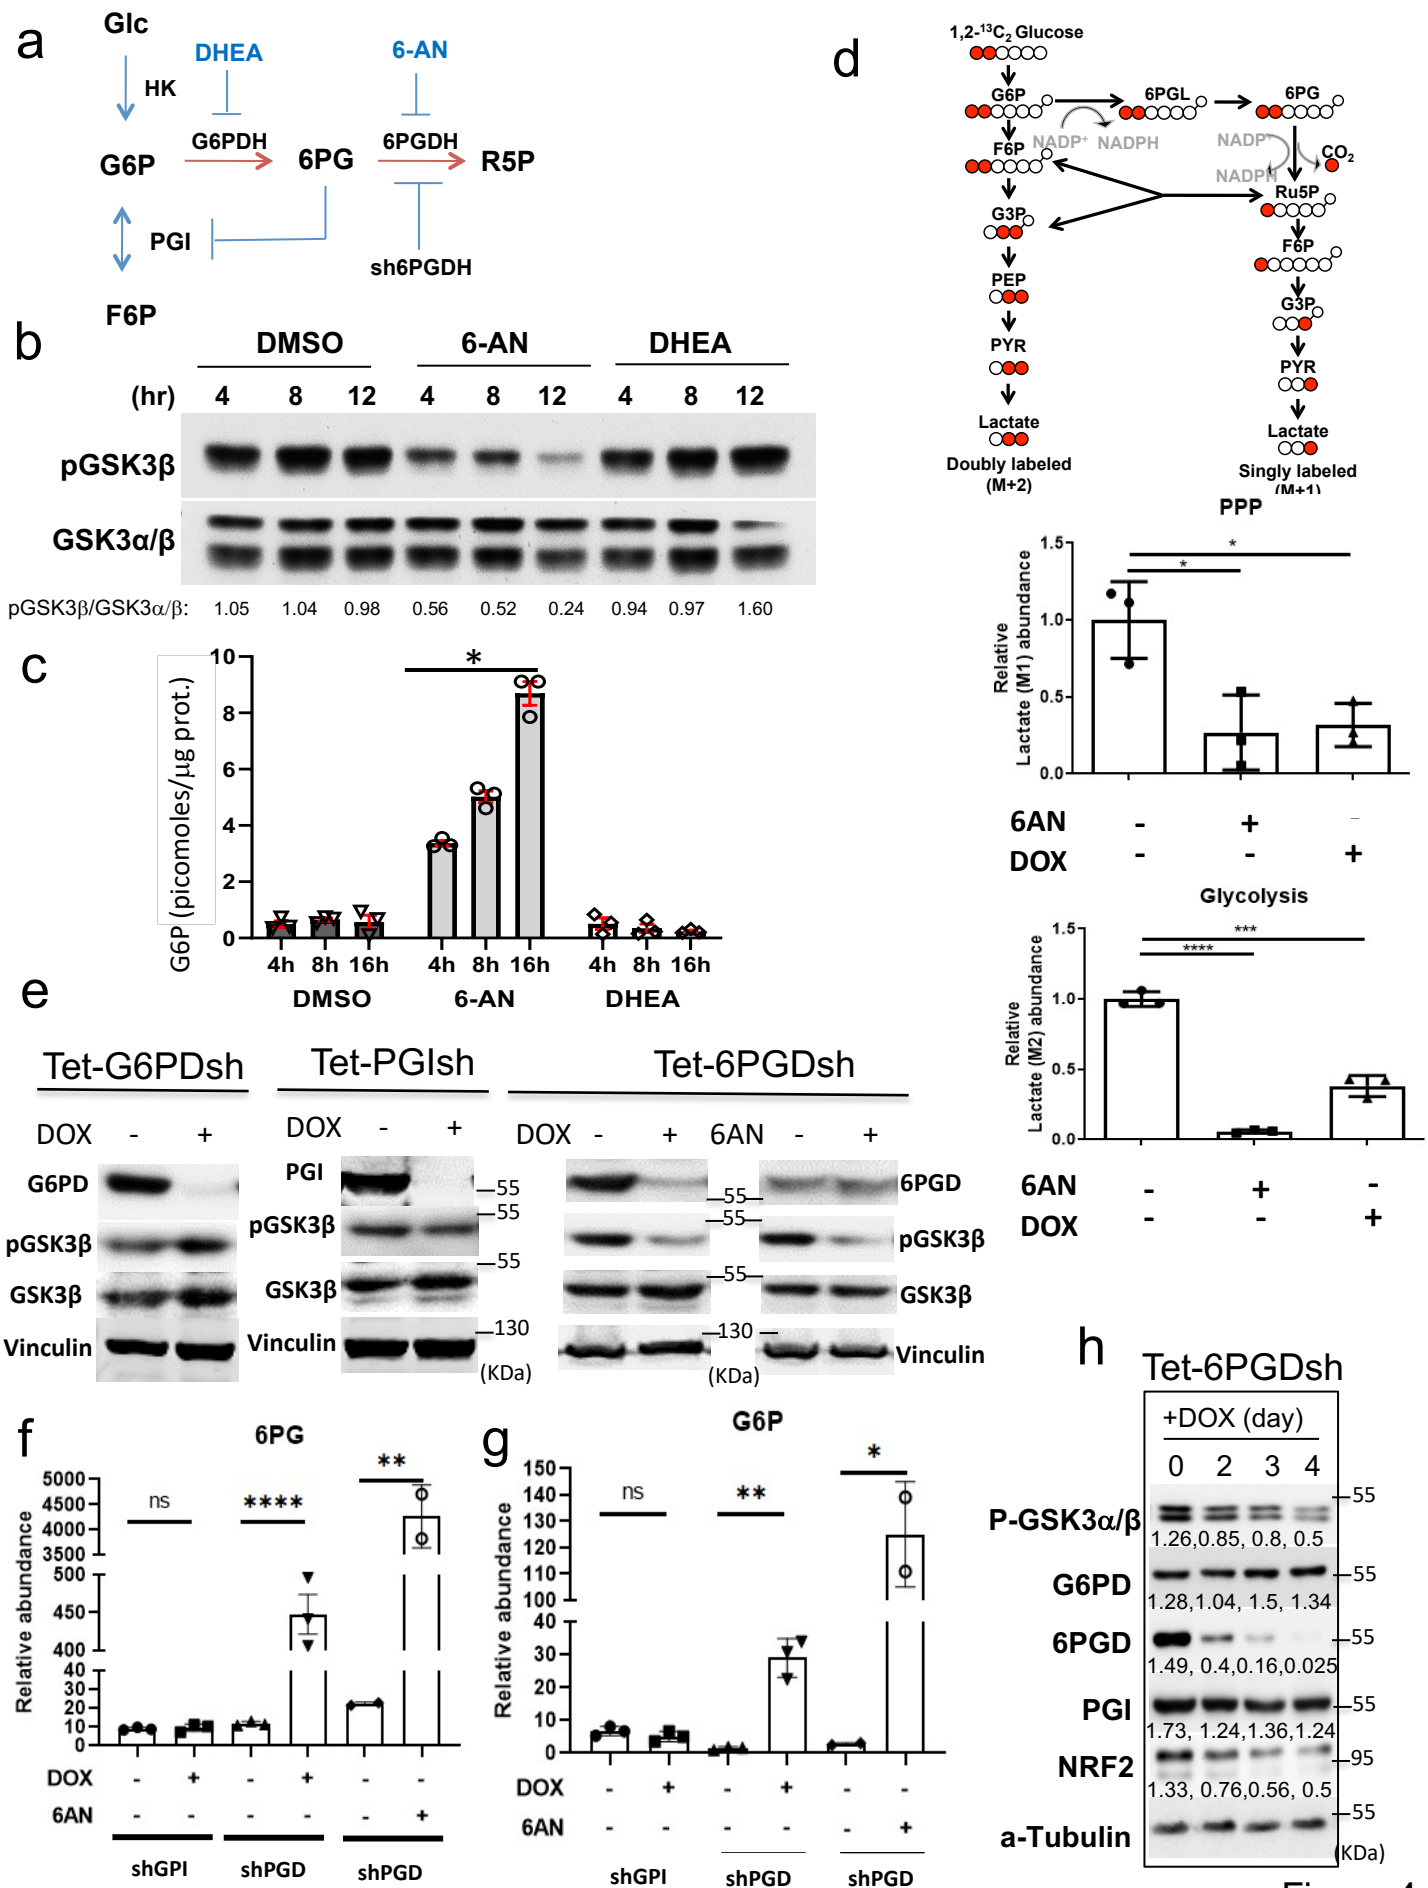

Figure 4

**a**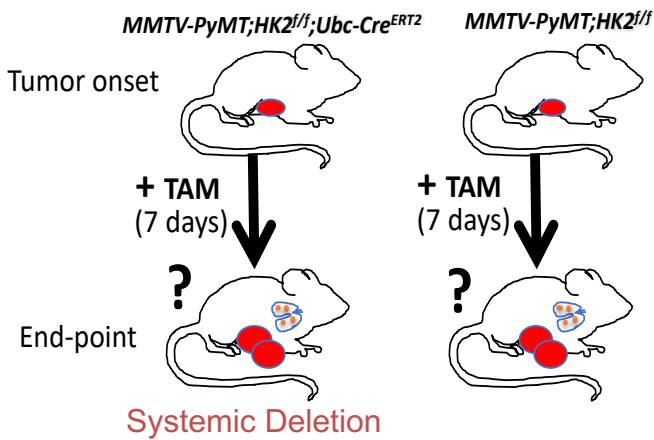**b**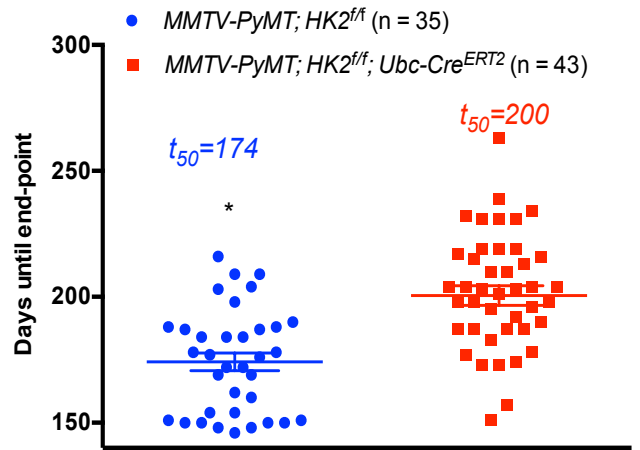**c**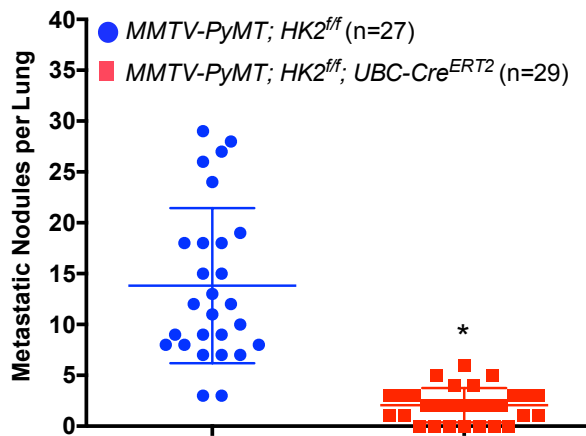**d**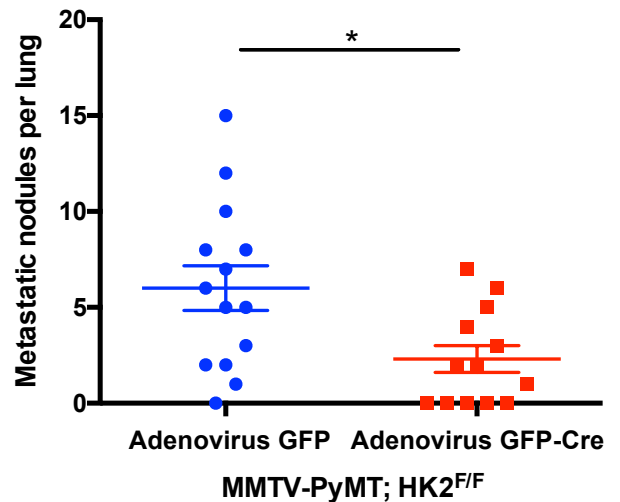**e**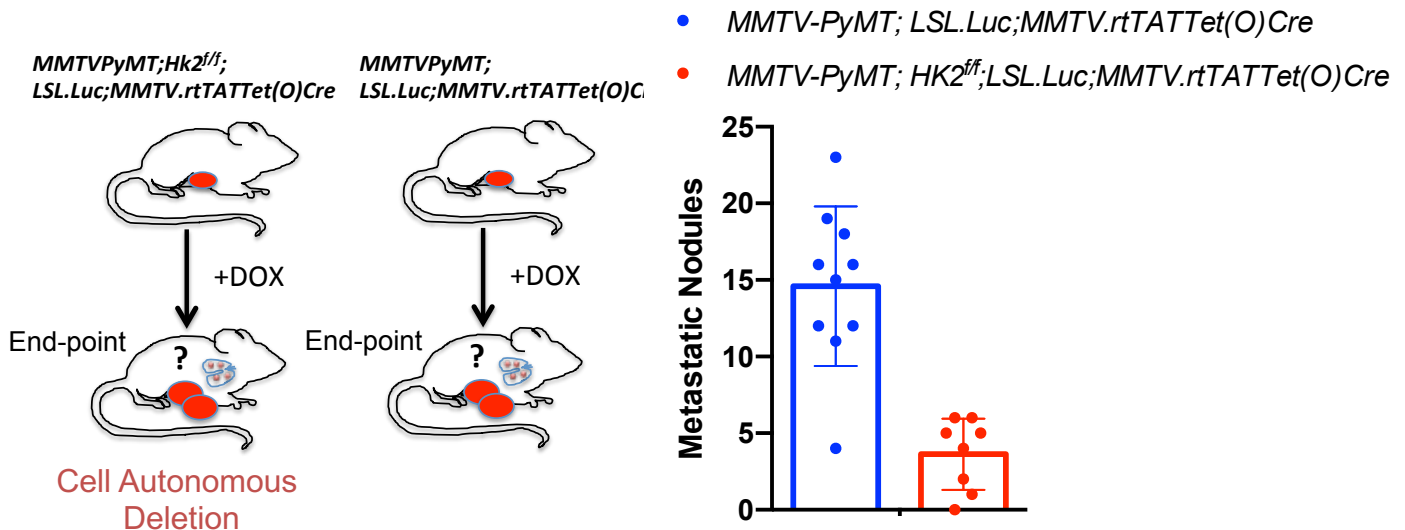**Figure 5**

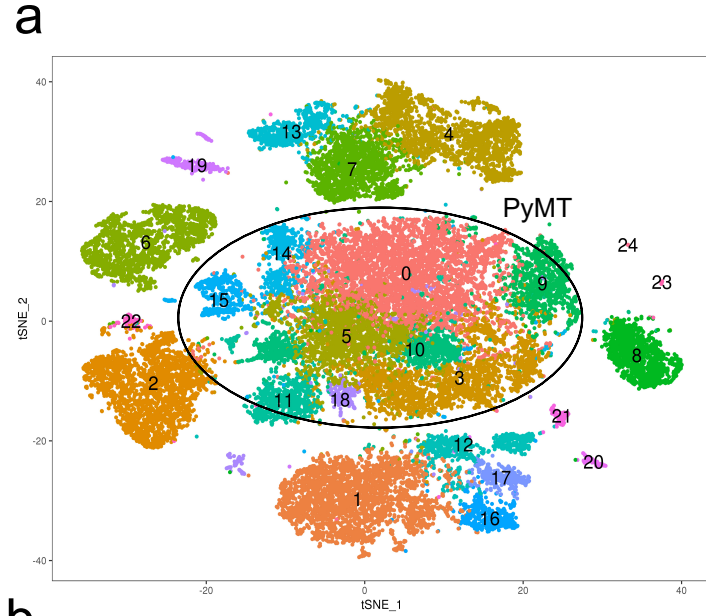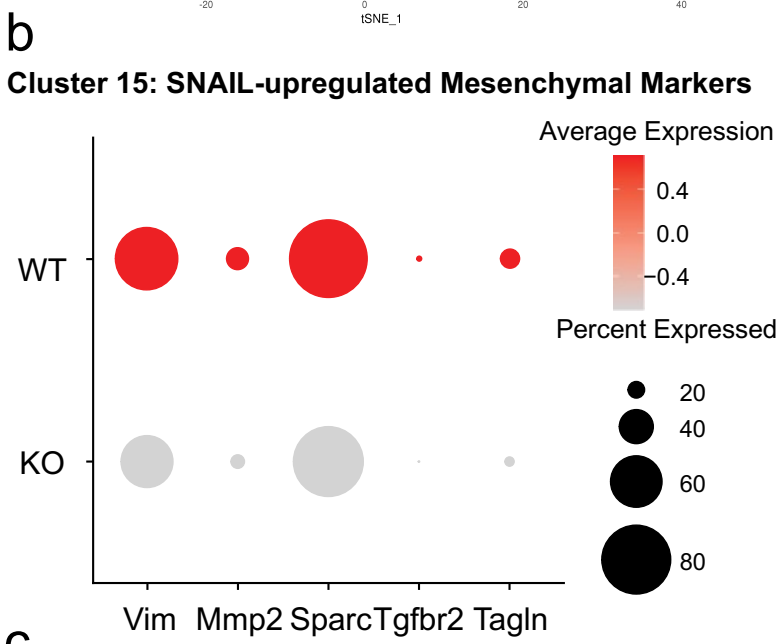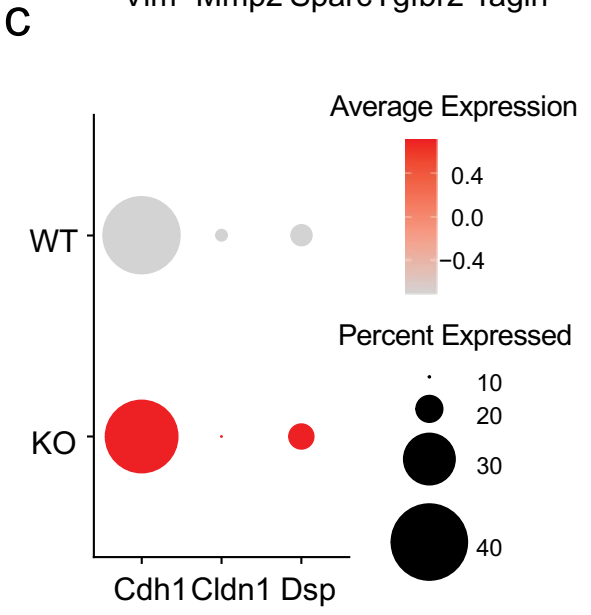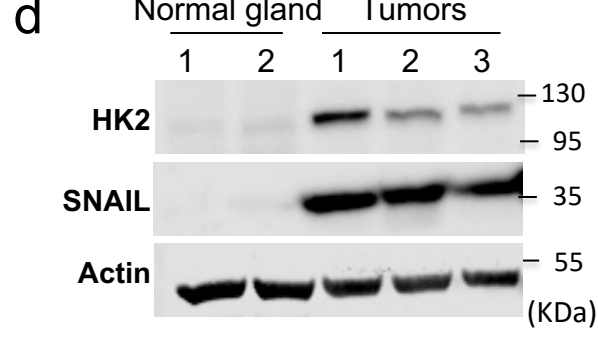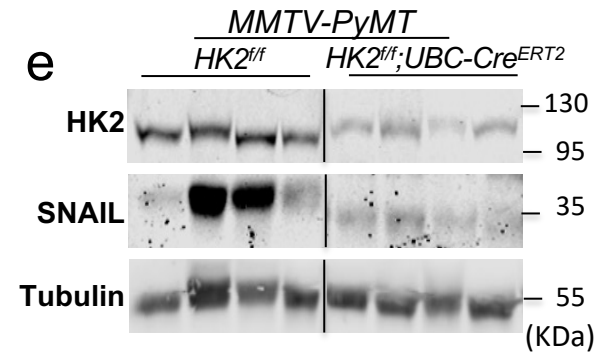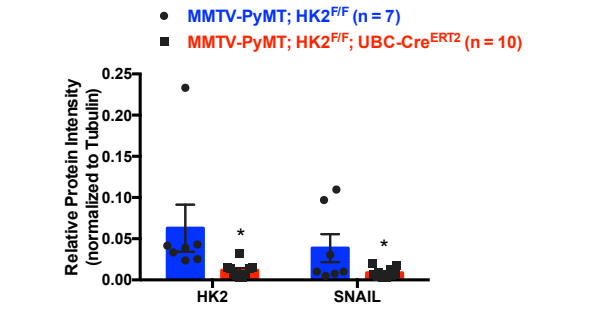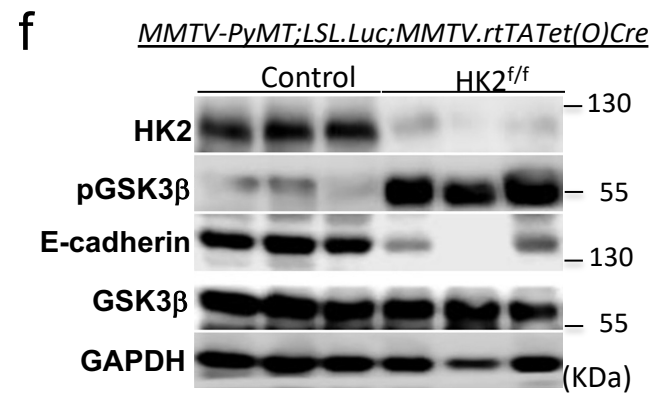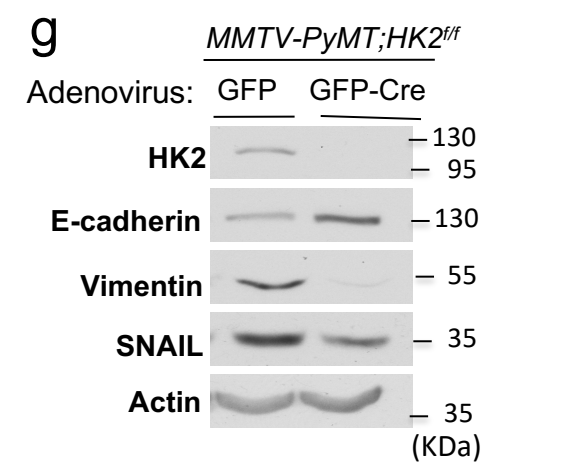

Figure 6

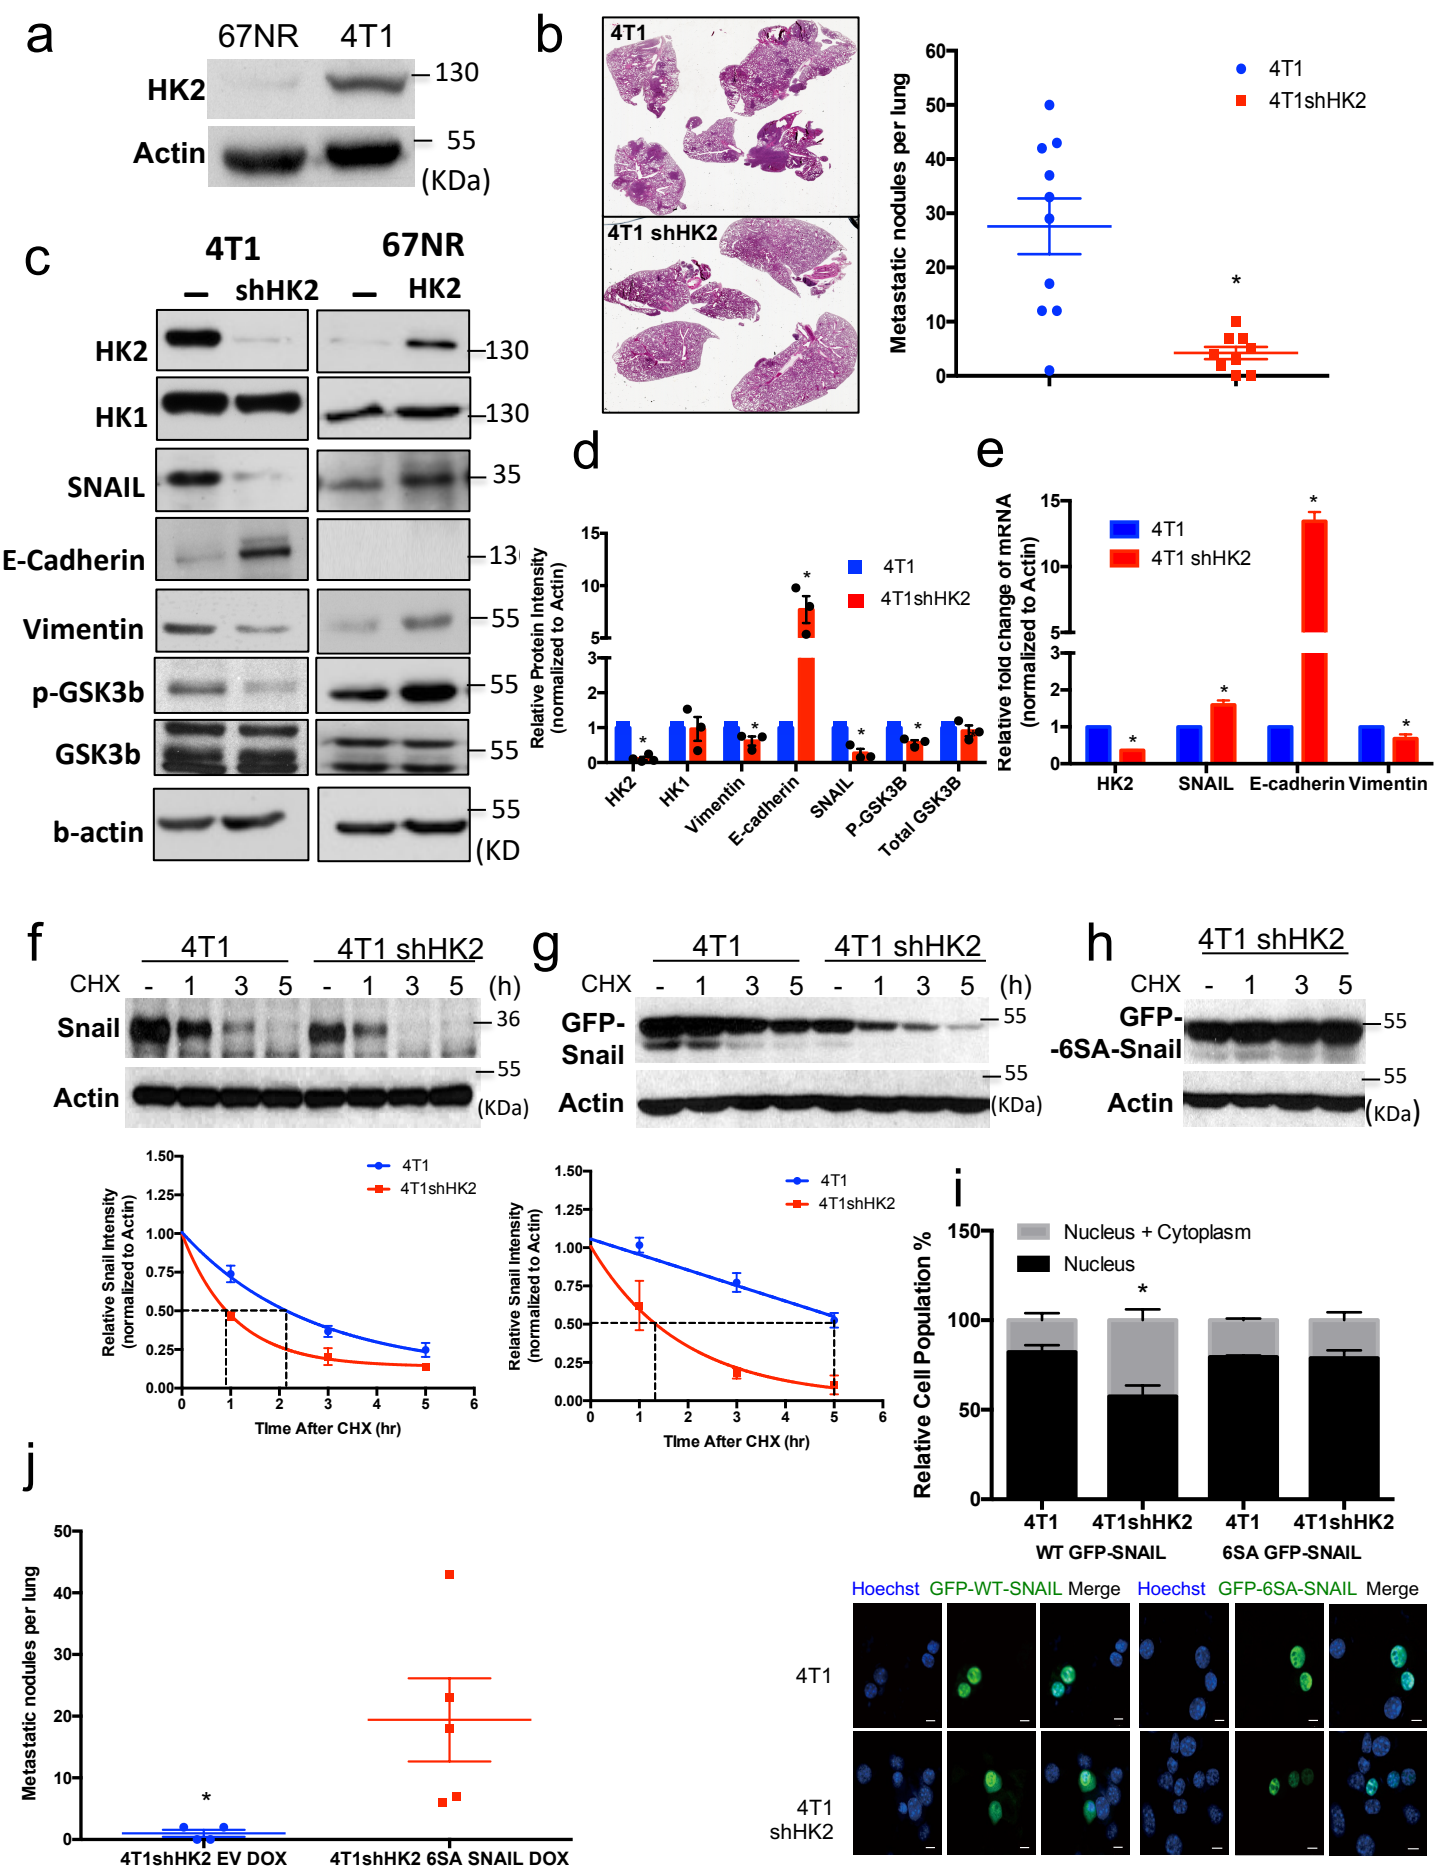

Figure 7

(X400) Scale bar: 10um

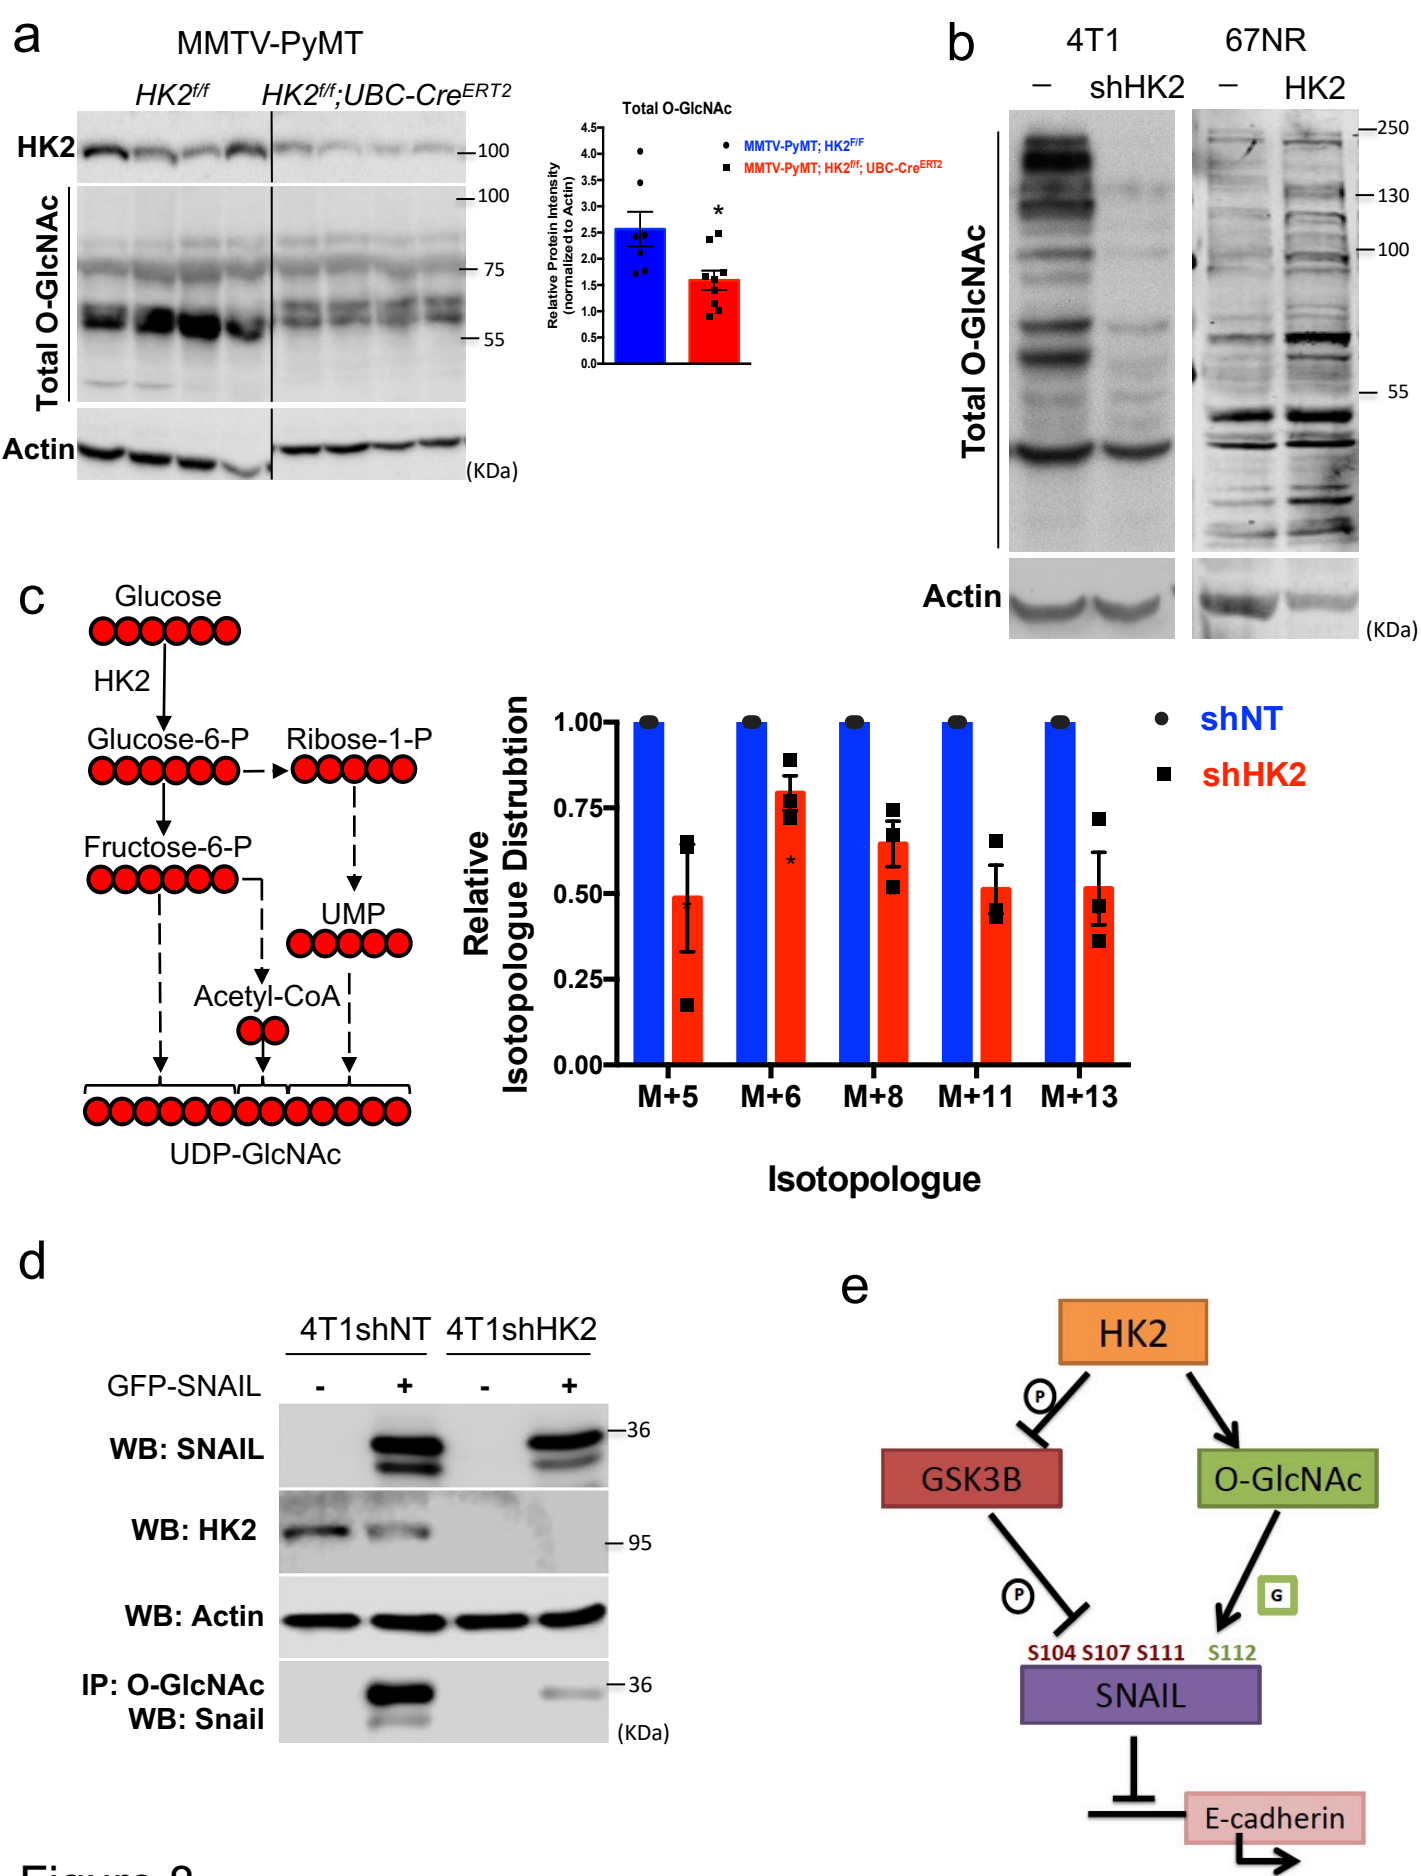

Figure 8

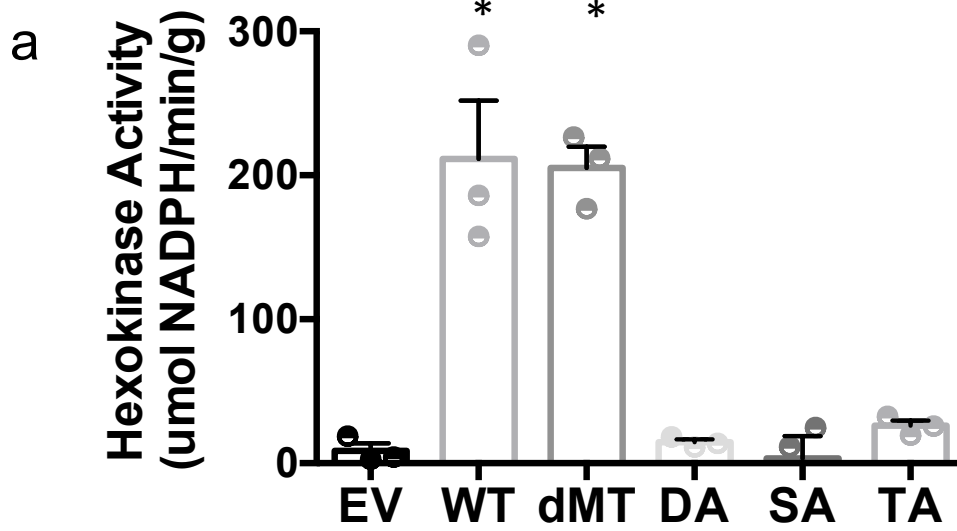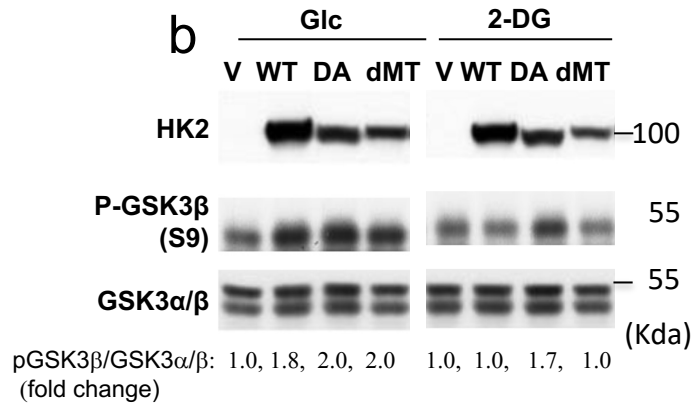

**Extended Data Figure 1**

## Rat1a

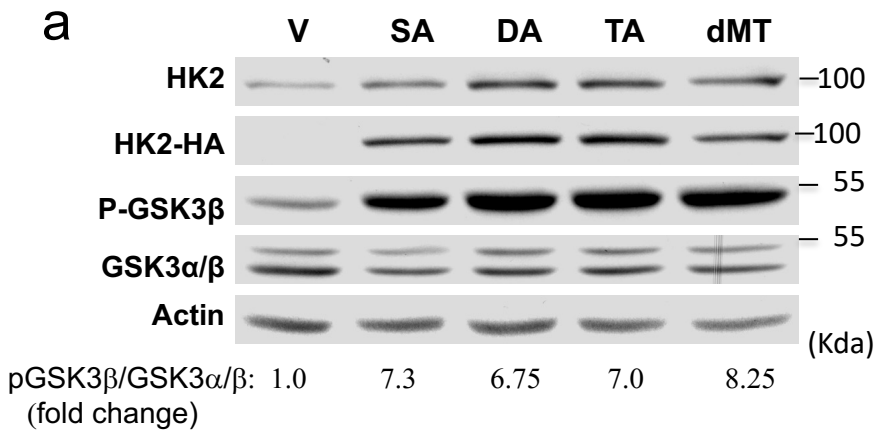

## HEK-293

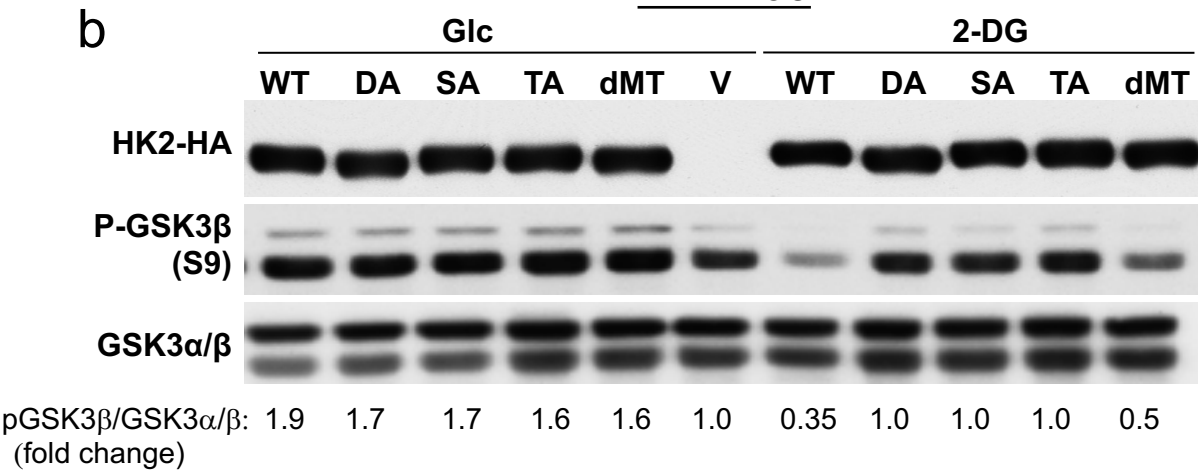

**Extended Data Figure 2**

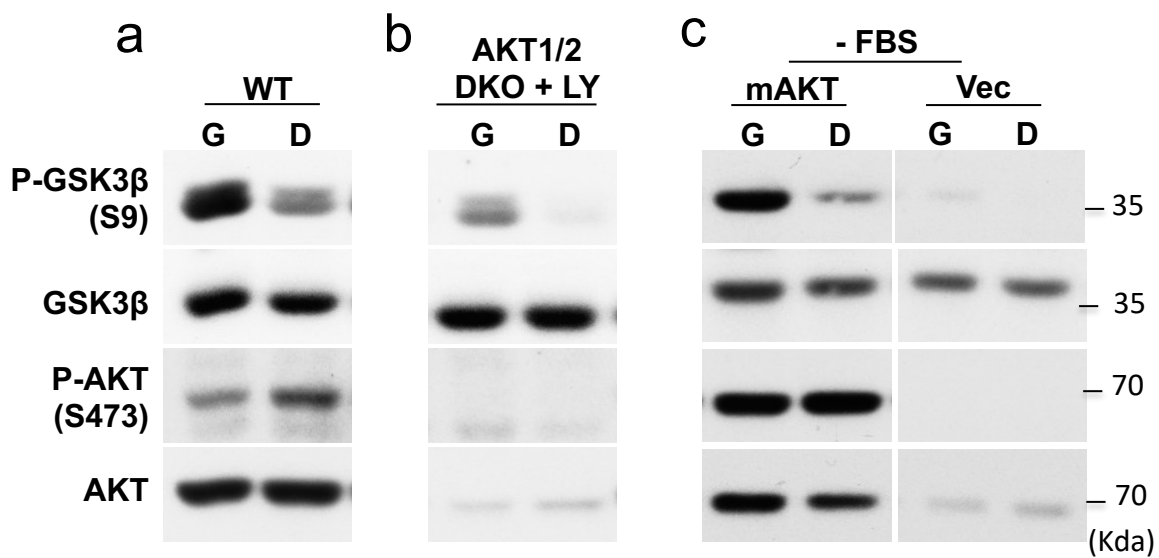

Extended Data Figure 3



**a**

|   |    |    |    |    |    |    |                  |           |           |           |           |           |
|---|----|----|----|----|----|----|------------------|-----------|-----------|-----------|-----------|-----------|
|   | 1  | 2  | 3  | 4  | 5  | 6  | 7                | 8         | 9         | 10        | 11        | 12        |
| A | A1 | A2 | A3 | A4 | A5 | A6 | A7               | A8        | A9        | A10       | A11       | A12       |
| B | B1 | B2 | B3 | B4 | B5 | B6 | B7               | B8        | B9        | B10       | B11       | B12       |
| C | C1 | C2 | C3 | C4 | C5 | C6 | C7               | C8        | C9        | C10       | C11       | C12       |
| D | D1 | D2 | D3 | D4 | D5 | D6 | D7               | D8        | D9        | D10       | D11       | D12       |
| E | E1 | E2 | E3 | E4 | E5 | E6 | E7               | E8        | E9        | E10       | E11       | E12       |
| F | F1 | F2 | F3 | F4 | F5 | F6 | F7               | F8        | F9        | F10       | F11       | F12       |
| G | G1 | G2 | G3 | G4 | G5 | G6 | G7               | G8        | G9        | G10       | G11       | G12       |
| H | H1 | H2 | H3 | H4 | H5 | H6 | negative control | control A | control B | control C | control D | control E |

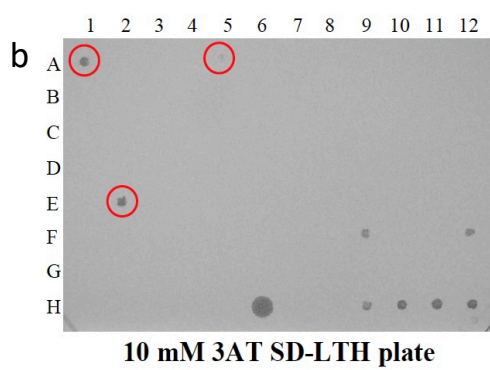

**The position of spotting colony**

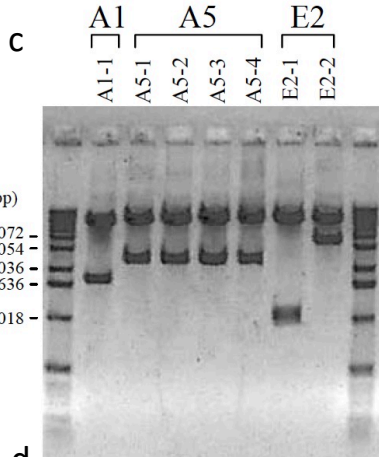

**d**

| Clone | SD-LT  | SD-LTH<br>10mM3AT | $\beta$ -gal<br>assay | SD-LT-<br>Ura | SD-LT+<br>5FOA | Interaction strength<br>in ProQuest System |
|-------|--------|-------------------|-----------------------|---------------|----------------|--------------------------------------------|
| A1-1  | growth | -                 | white                 | -             | growth         | no interactor                              |
| A5-1  | growth | -                 | white                 | -             | growth         | no interactor                              |
| E2-1  | growth | -                 | white                 | -             | growth         | no interactor                              |
| E2-2  | growth | growth            | blue(weak)            | growth(weak)  | weak growth    | Possible weak interactor                   |

**e** The insert sequence of E2-2

```

1 GGC GGG GCT GGG AGC AAA GCG CTG AGG GAG CTC GGT ACG CCG CCG
1 G G A G S K A L R E L G T P P

46 CCT CGC ACC CGC AGC CTC GCG CCC GCC GCC CGT CCC CAG AGA
16 P R T R S L A P A A A R P Q R

91 ACC ATG GAG TCT GGC AGT ACC GCC GCC AGT GAG GAG GCA CGC AGC
31 T M E S G S T A A S E E A R S

137 CTT CGA GAA TGT GAG CTC TAC GTC CAG AAG CAT AAC ATT CAA GCG
46 L R E C E L Y V Q K H N I Q A

183 CTG CTC AAA GAT TCT ATT GTG CAG TTG TGC ACT GCT CGA CCT GAG
61 L L K D S I V Q L C T A R P E

229 AGA CCC ATG GCA TTC CTC AGG GAA TAC TTT GAG AGG TTG GAG AAG
76 R P M A F L R E Y F E R L E K

275 GAG GAG GCA AAA CAG ATT CAG AAT CTG CAG AAA GCA GGC ACT CGT
91 E E A K Q I Q N L Q K A G T R

321 ACA GAC TCA AGG GAG GAT GAG ATT TCT CCT CCT CCA CCC AAC CCA
106 T D S R E D E I S P P P P N P

367 GTG GTT AAA GGT AGG AGG CGA CGA GGT GCT ATC AGC GCT GAG GTC
121 V V K G R R R R G A I S A E V

413 TAC ACG GAG GAA GAT GCG GCA TCC TAT GTT AGA AAG GTT ATA CCA
136 Y T E E D A A S Y V R K V I P

459 AAA GAT TAC AAG ACA ATG GCC GCT TTA GCC 480
151 K D Y K T M A A L A

```

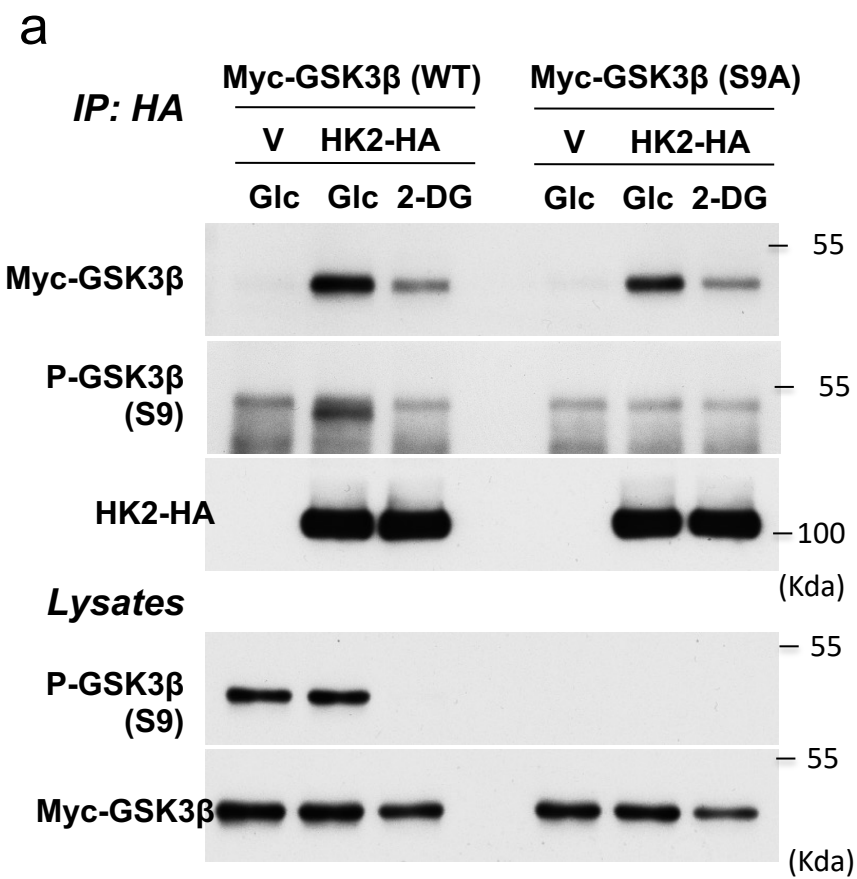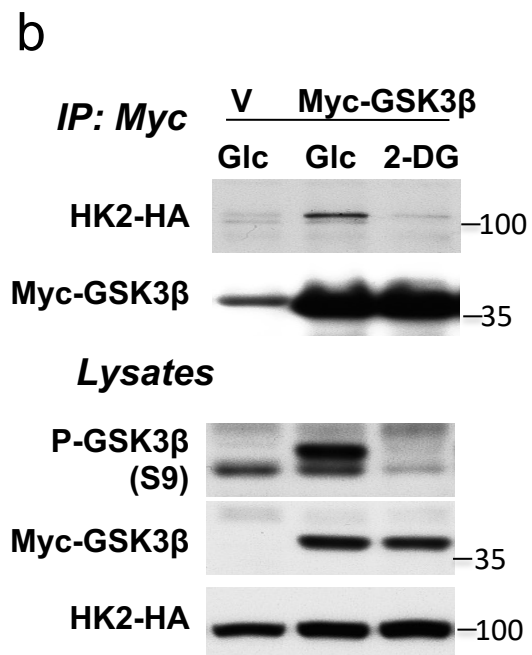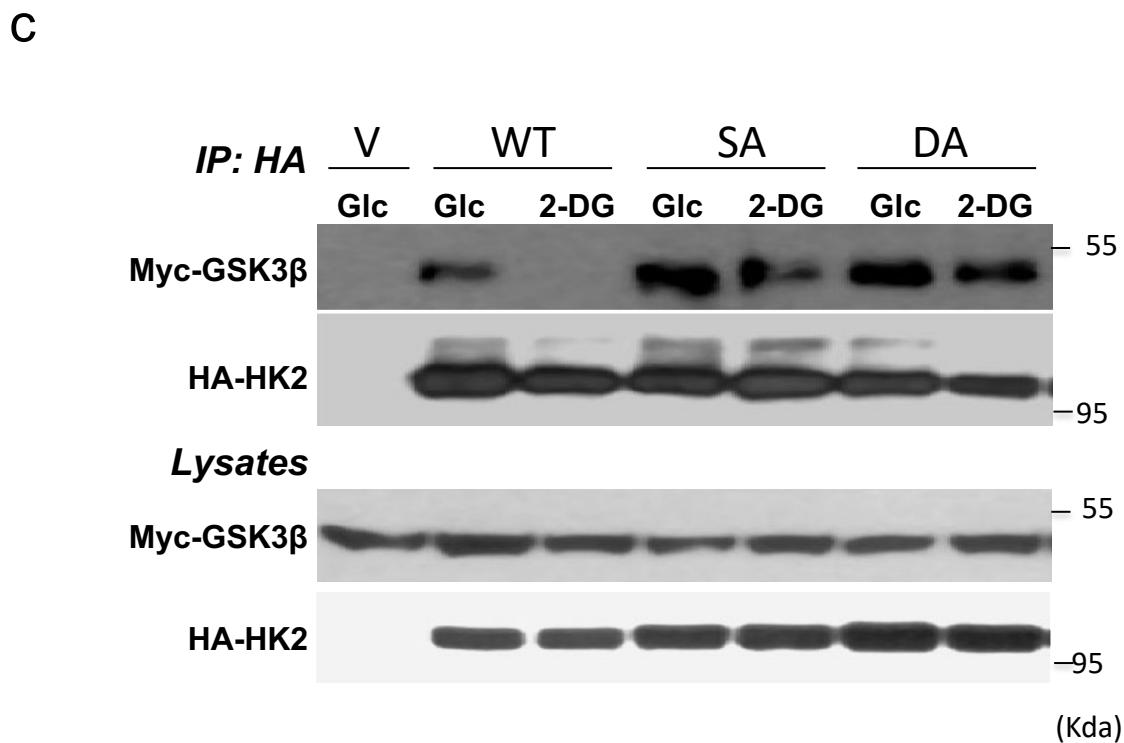

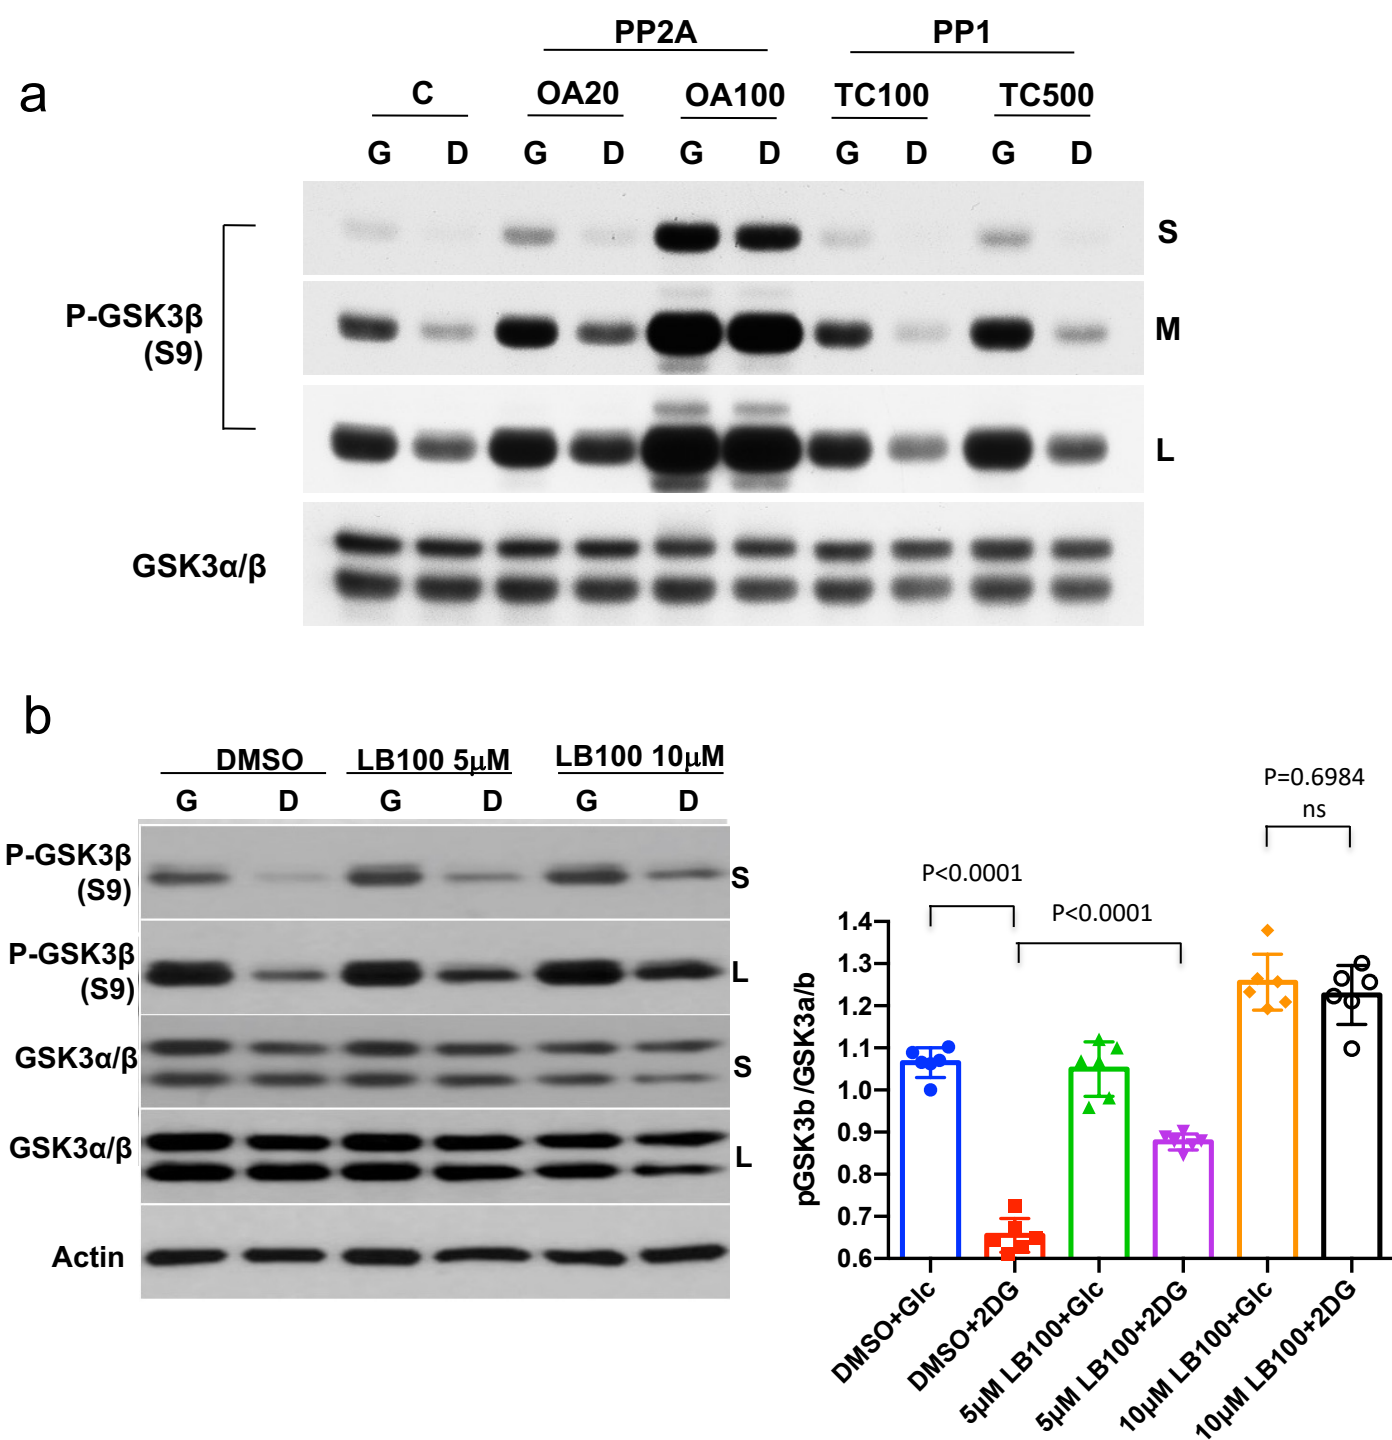

Extended Data Figure 6

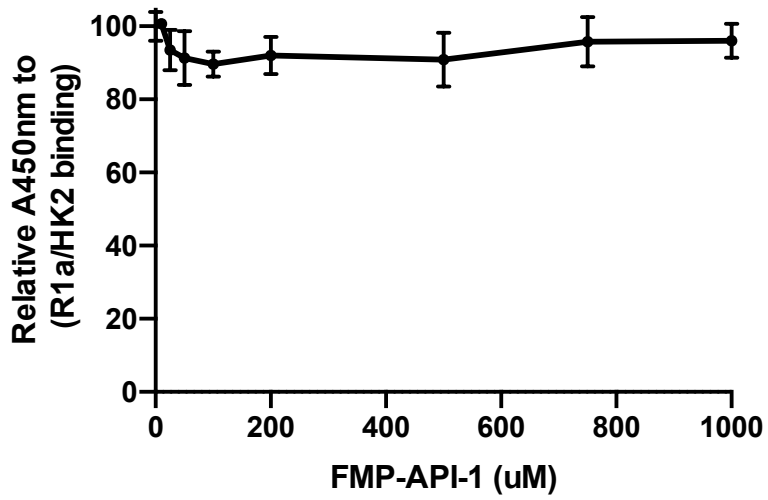

Extended Data Figure 7

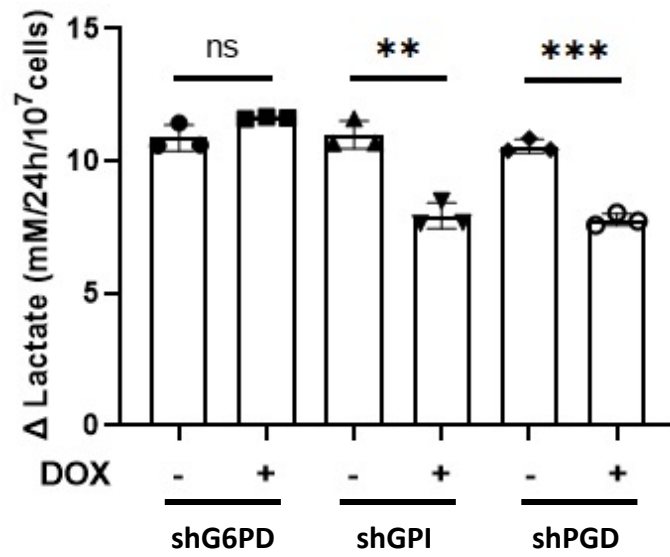

Extended Data Figure 8

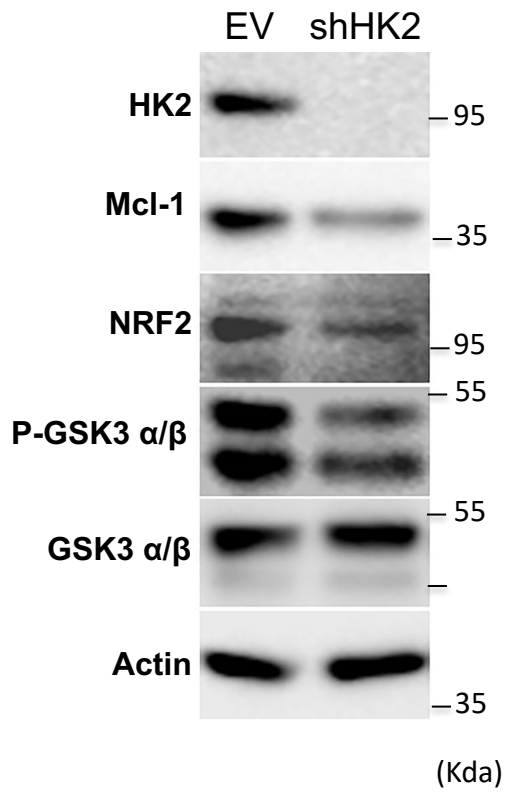

**Extended Data Figure 9**

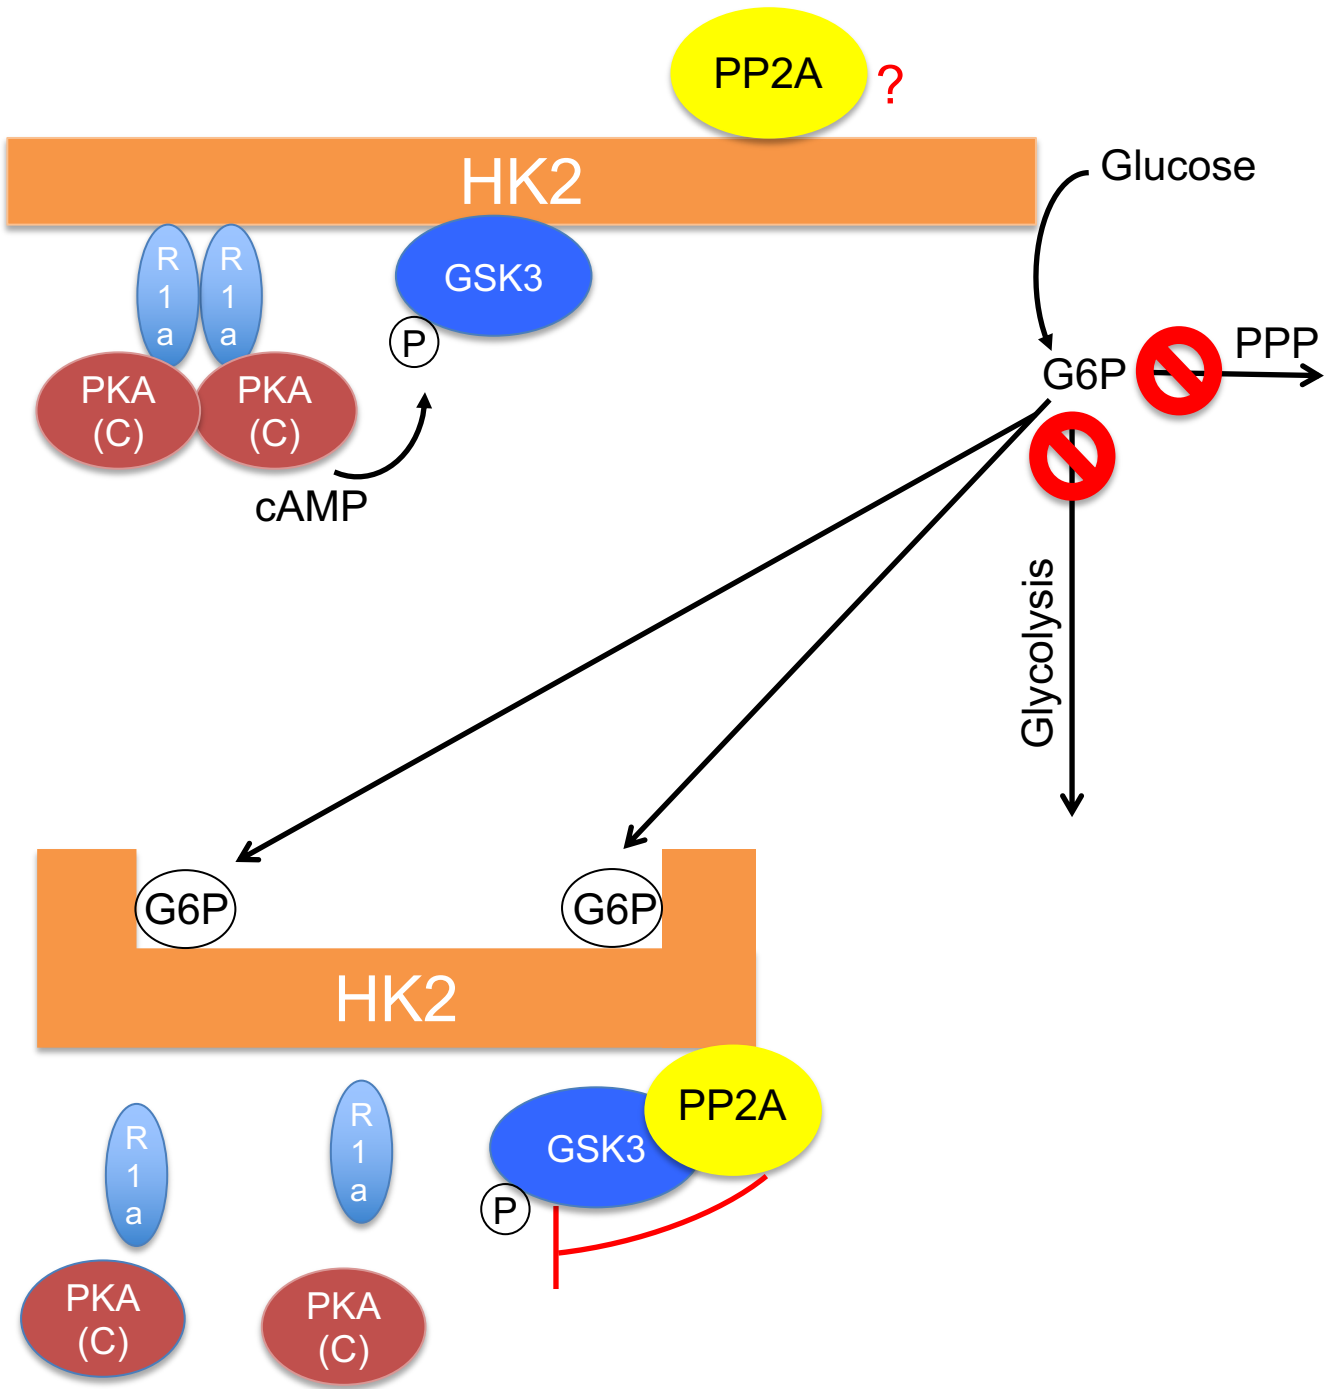

Extended Data Figure 10

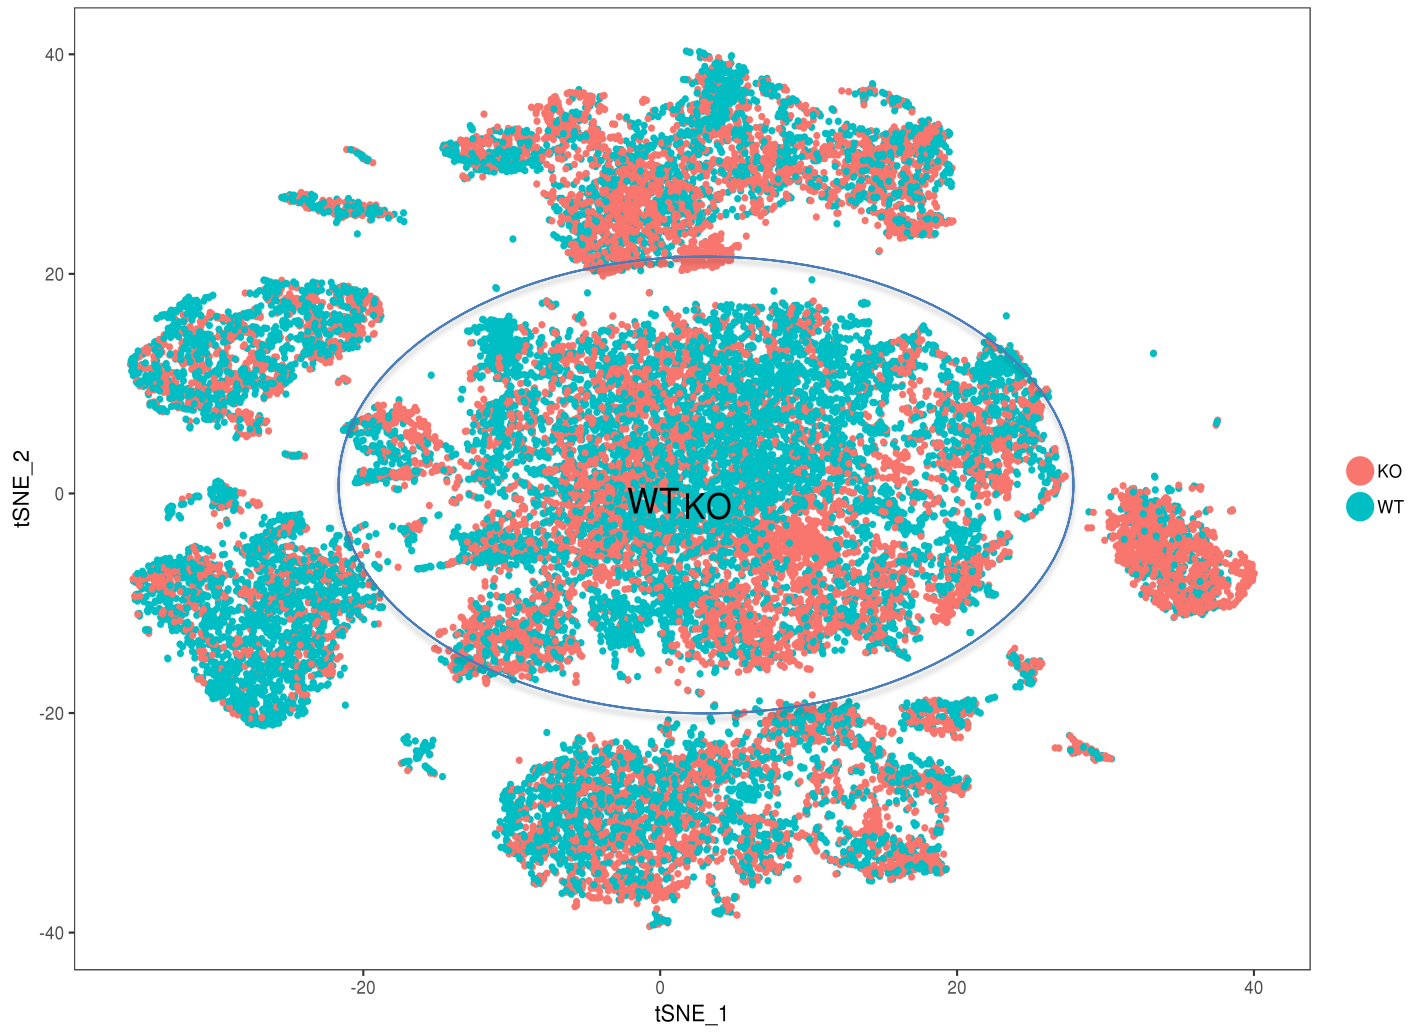

**Extended Data Figure 11**



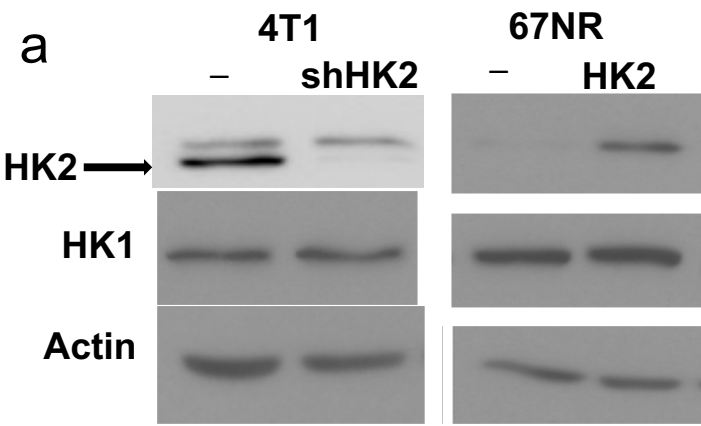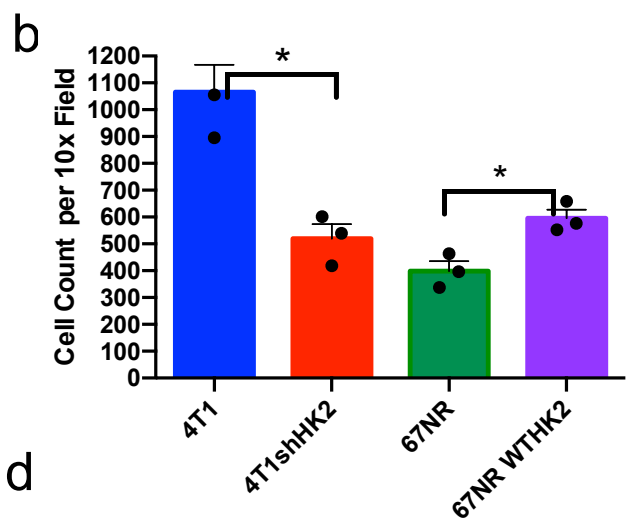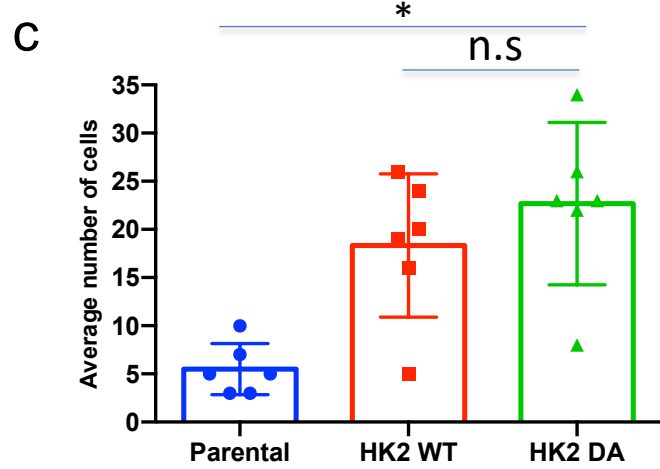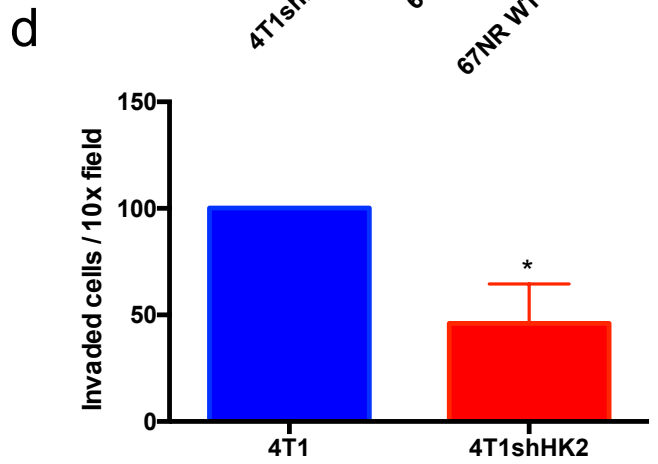

Extended Data Figure 12

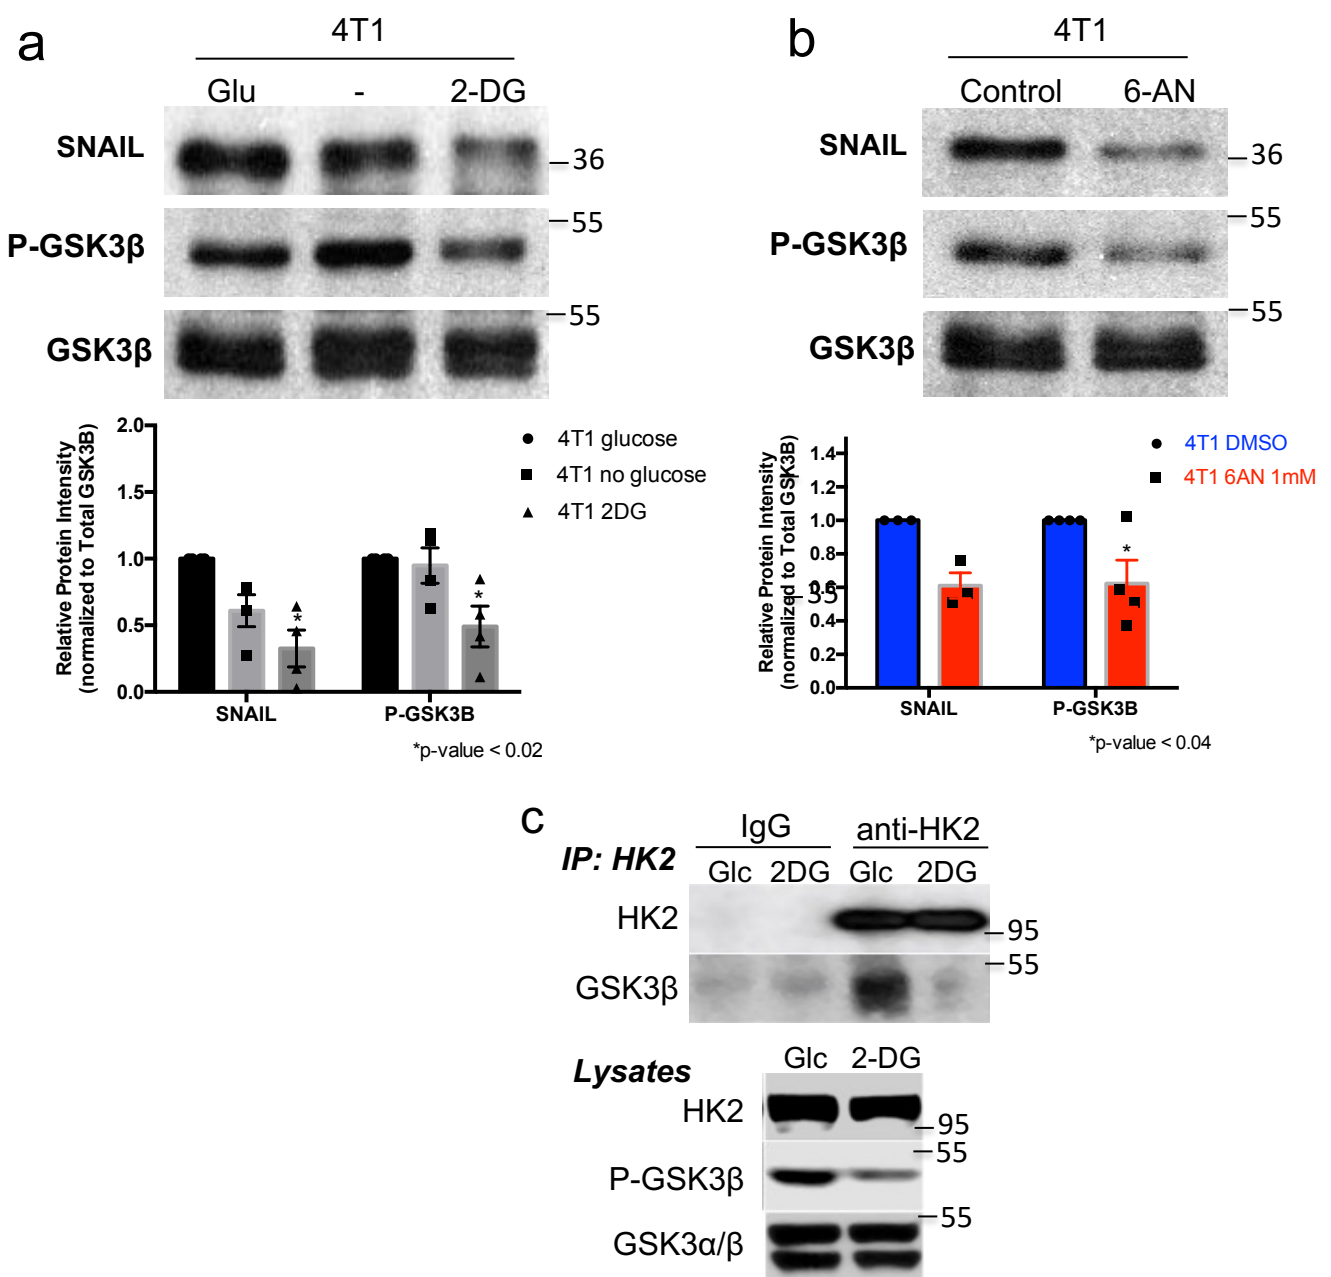

Extended Data Figure 13
